# Supplementary material for: The transcriptionally active regions in the genome of Bacillus subtilis
Source: PubMed Central journal article supplement (PMC2784878; doi:10.1111/j.1365-2958.2009.06830.x), 2009-08-26

## Figure S2

The following pages show the level of expression along the genome of *Bacillus subtilis* when growing on rich (LB) and minimal (M9) medium. The signal from genomic DNA hybridized to the same tiling chip (Rasmussen *et al.*, 2009) is also shown. Each page contains two similar plots each presenting ~44 Kb of the genome. The two blue bands show the expression in LB and M9 respectively on the positive strand, the two magenta bands show the minus strand. The darker the color the higher the expression in the given position. On top of the bands the expression level is plotted as a scaled version (0-10) of the log<sub>2</sub> to the fold change (signal/background signal). In the middle of each plot the gDNA signal is shown for both strands, here the color scale is yellow-green-black, where black is low and yellow is high. Along the genome, in all 6 bands in the same positions, white regions indicate regions where the recent re-sequencing of the genome (AL009126.3) have shown either inserts or regions with very low similarity to the last version (see Rasmussen *et al.*, 2009). Annotated genes are shown as black arrows in the top and the bottom of each plot (annotation from AL009126.3), indicating genes on the positive and negative strand respectively. New genes are shown as red arrows below (+ strand) and above (- strand) each band. Both predicted and experimentally verified terminators and sigma-factor binding sites are shown on top of the gDNA bands. Dark red triangles: Experimentally verified terminators, red triangles: Predicted terminators, stars: Experimentally verified sigma-factor binding sites, green dots: Predicted sigma-factor binding sites.

### 0 – 44 Kb

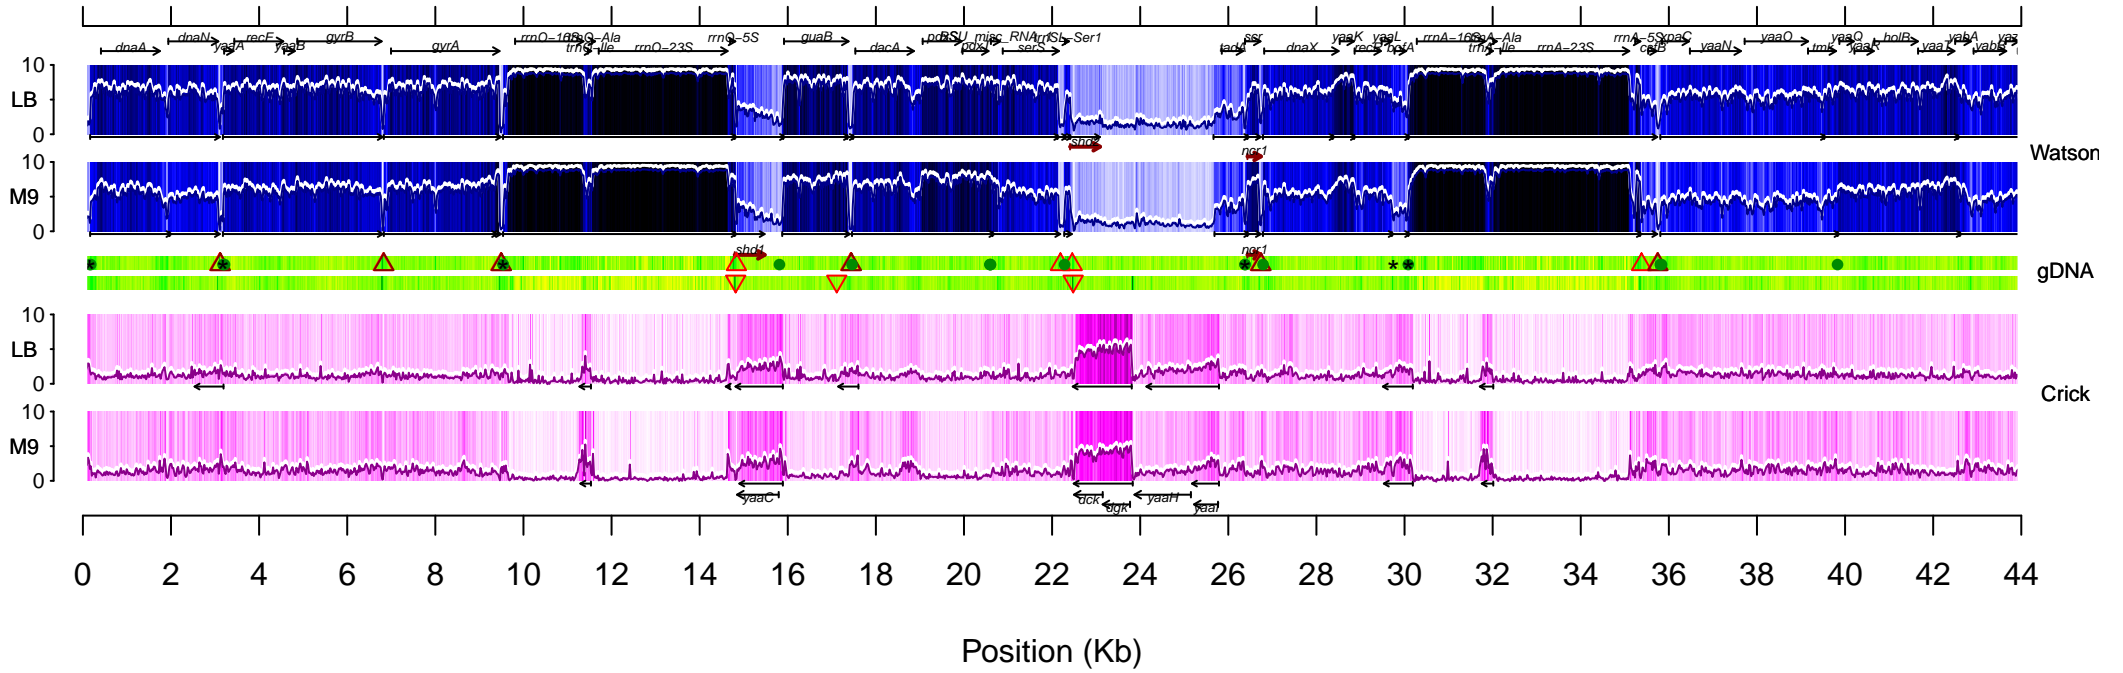

### 44 – 88 Kb

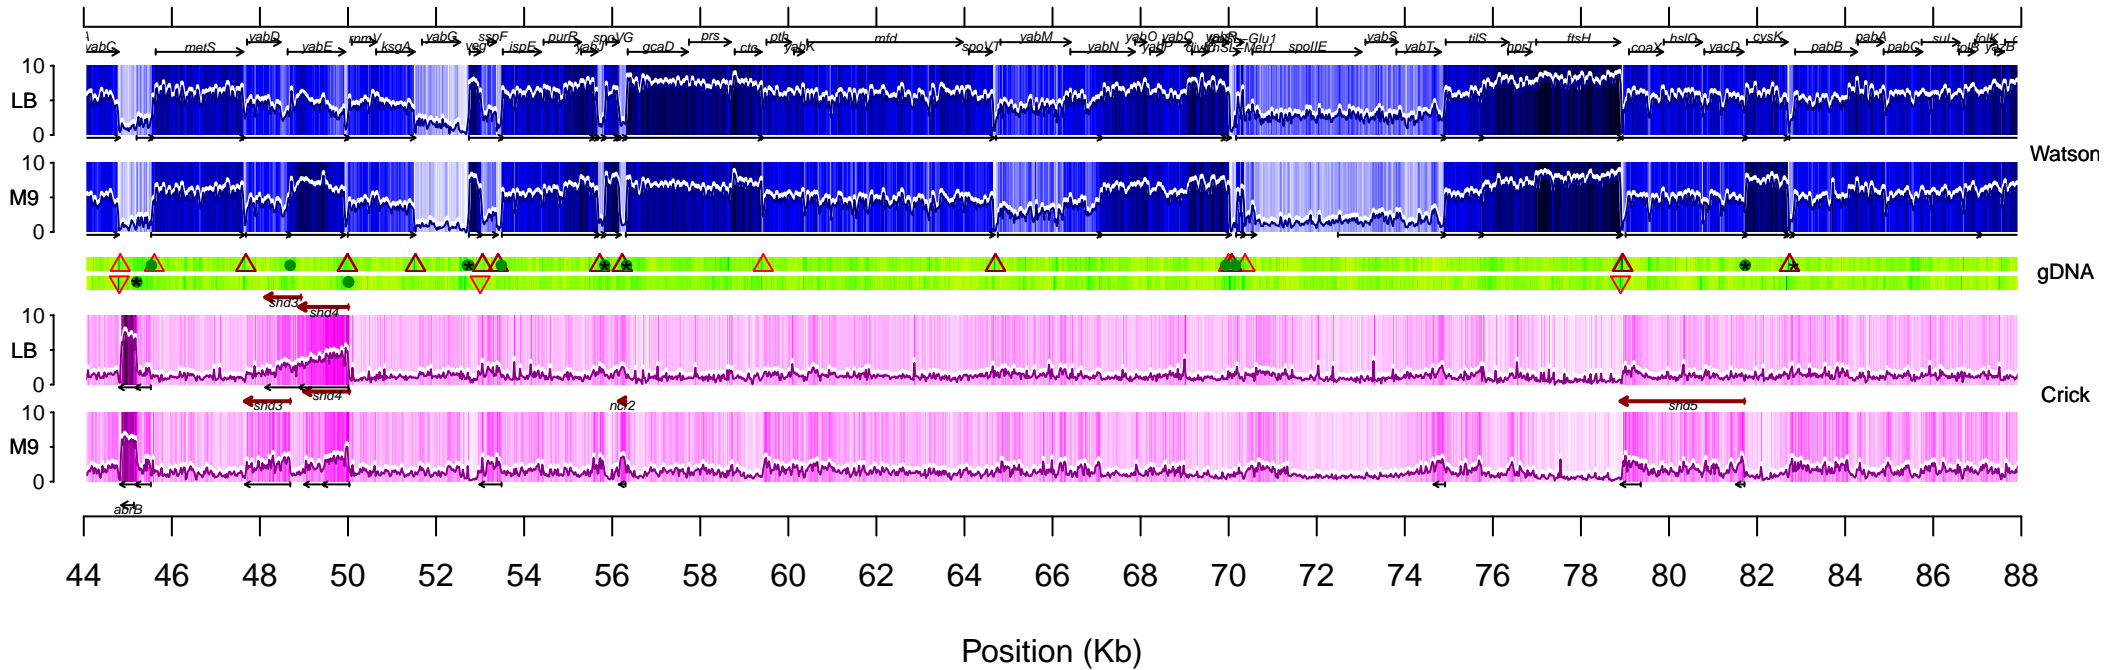

## 88 - 132 Kb

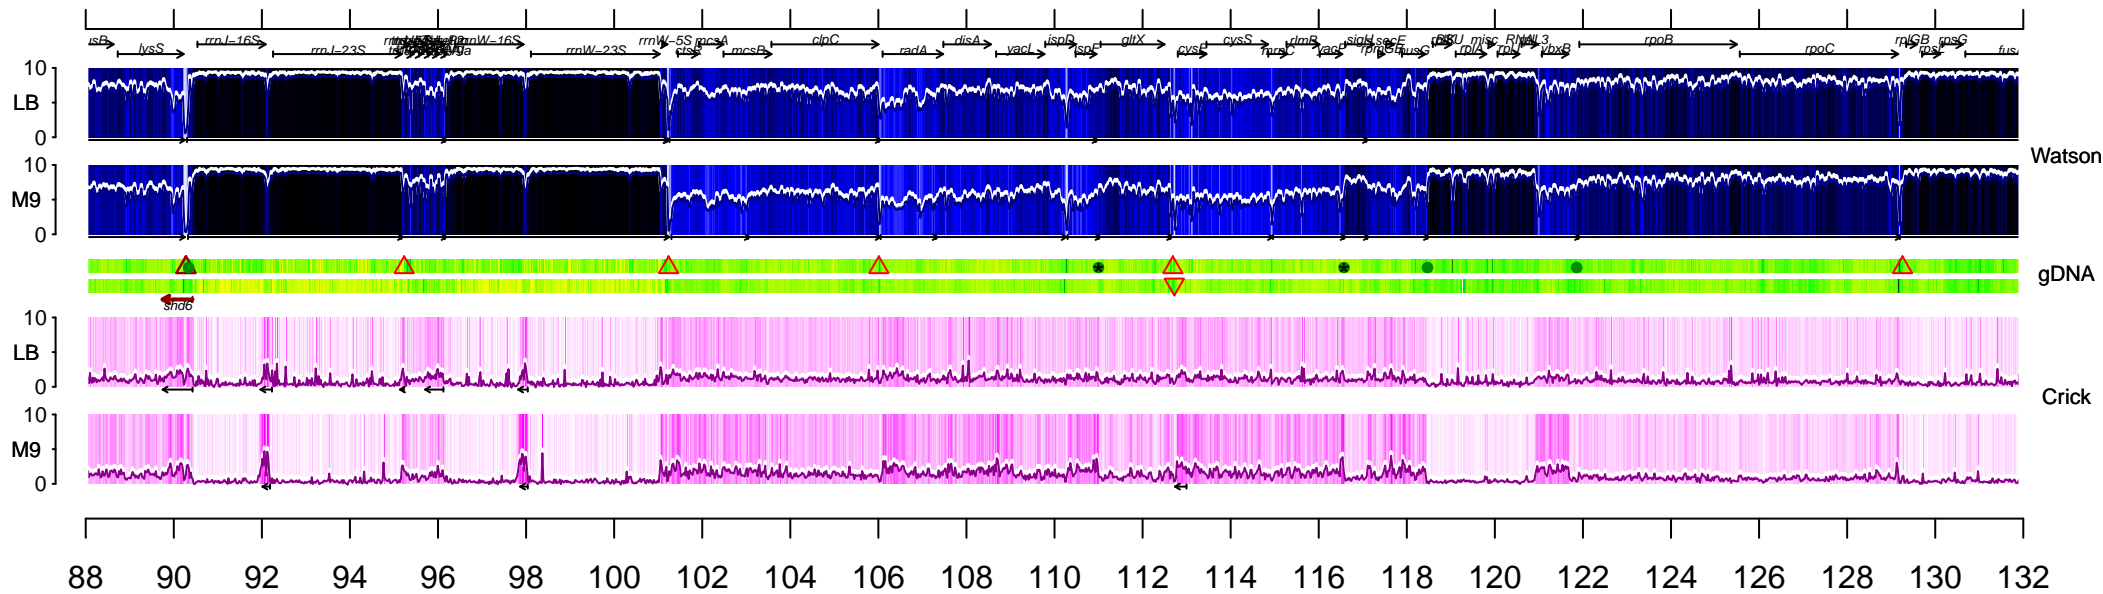

Position (Kb)

## 132 - 176 Kb

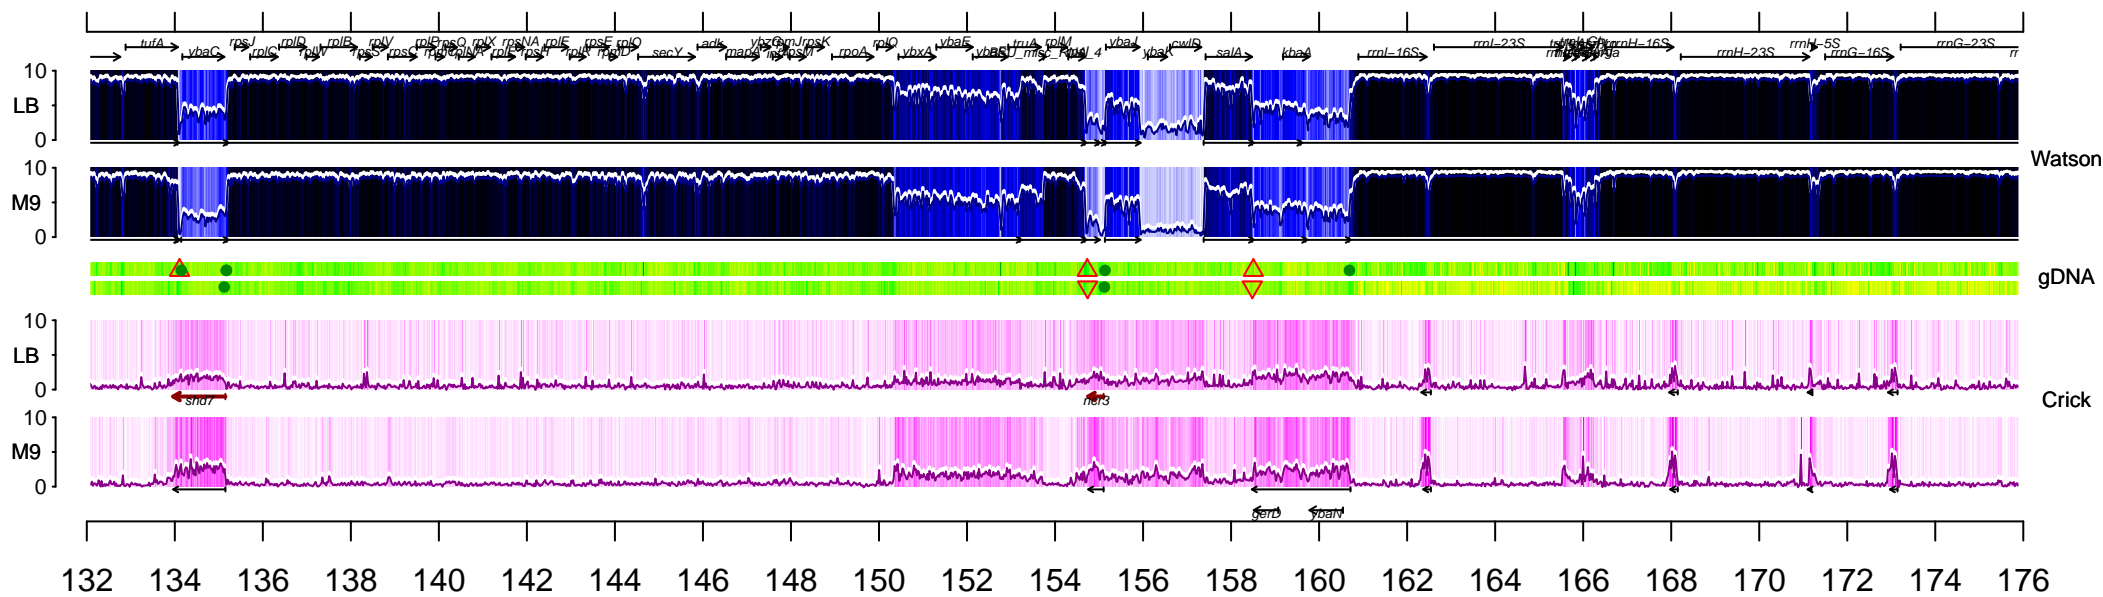

Position (Kb)

### 176 – 220 Kb

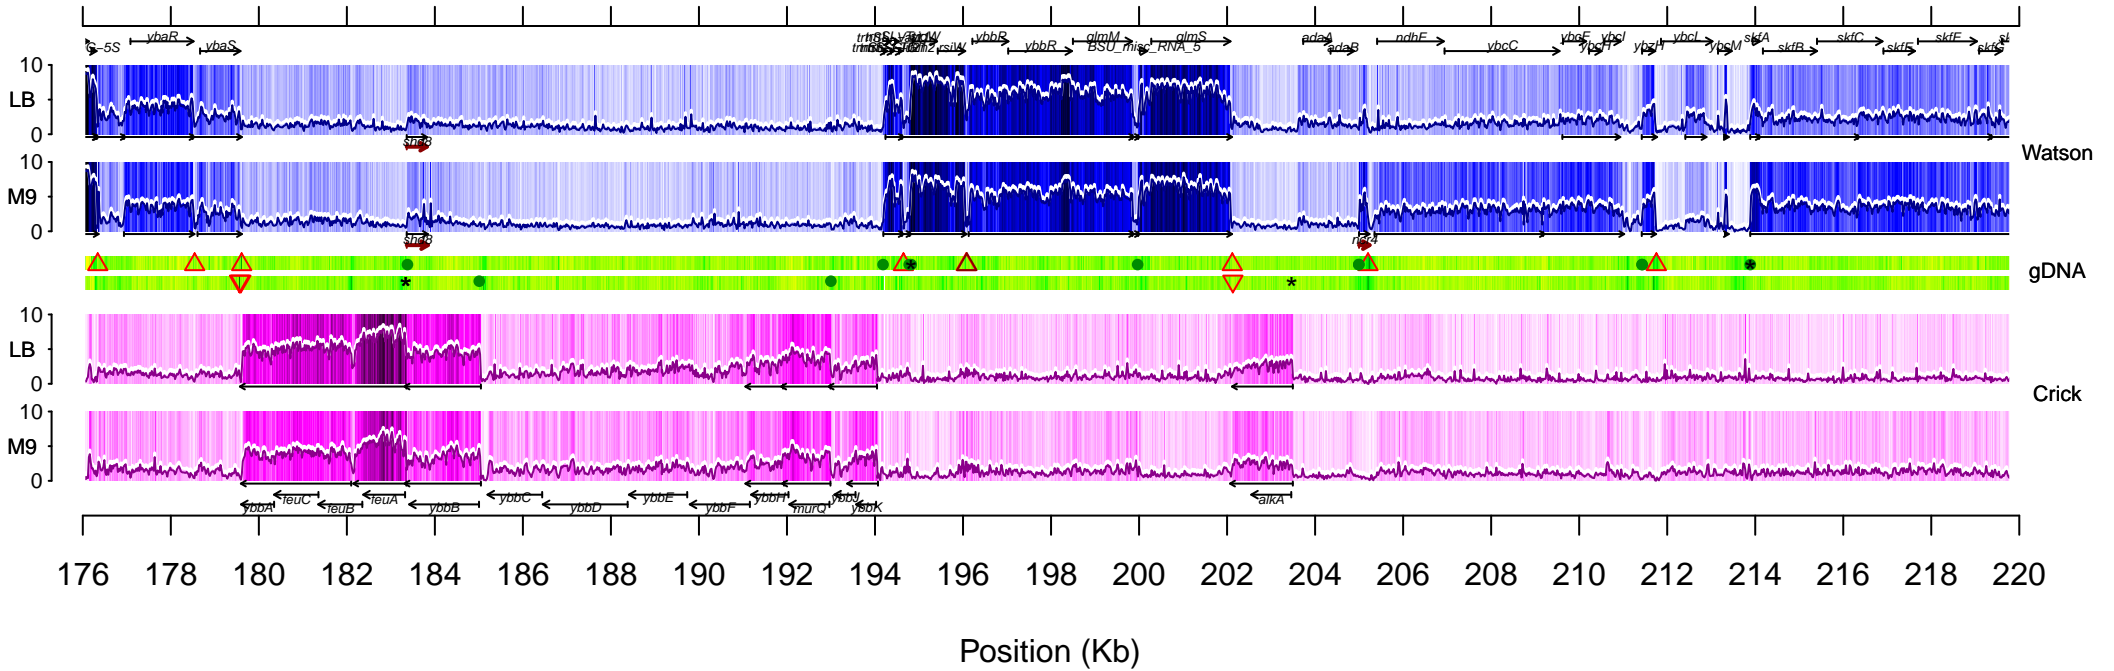

### 220 – 264 Kb

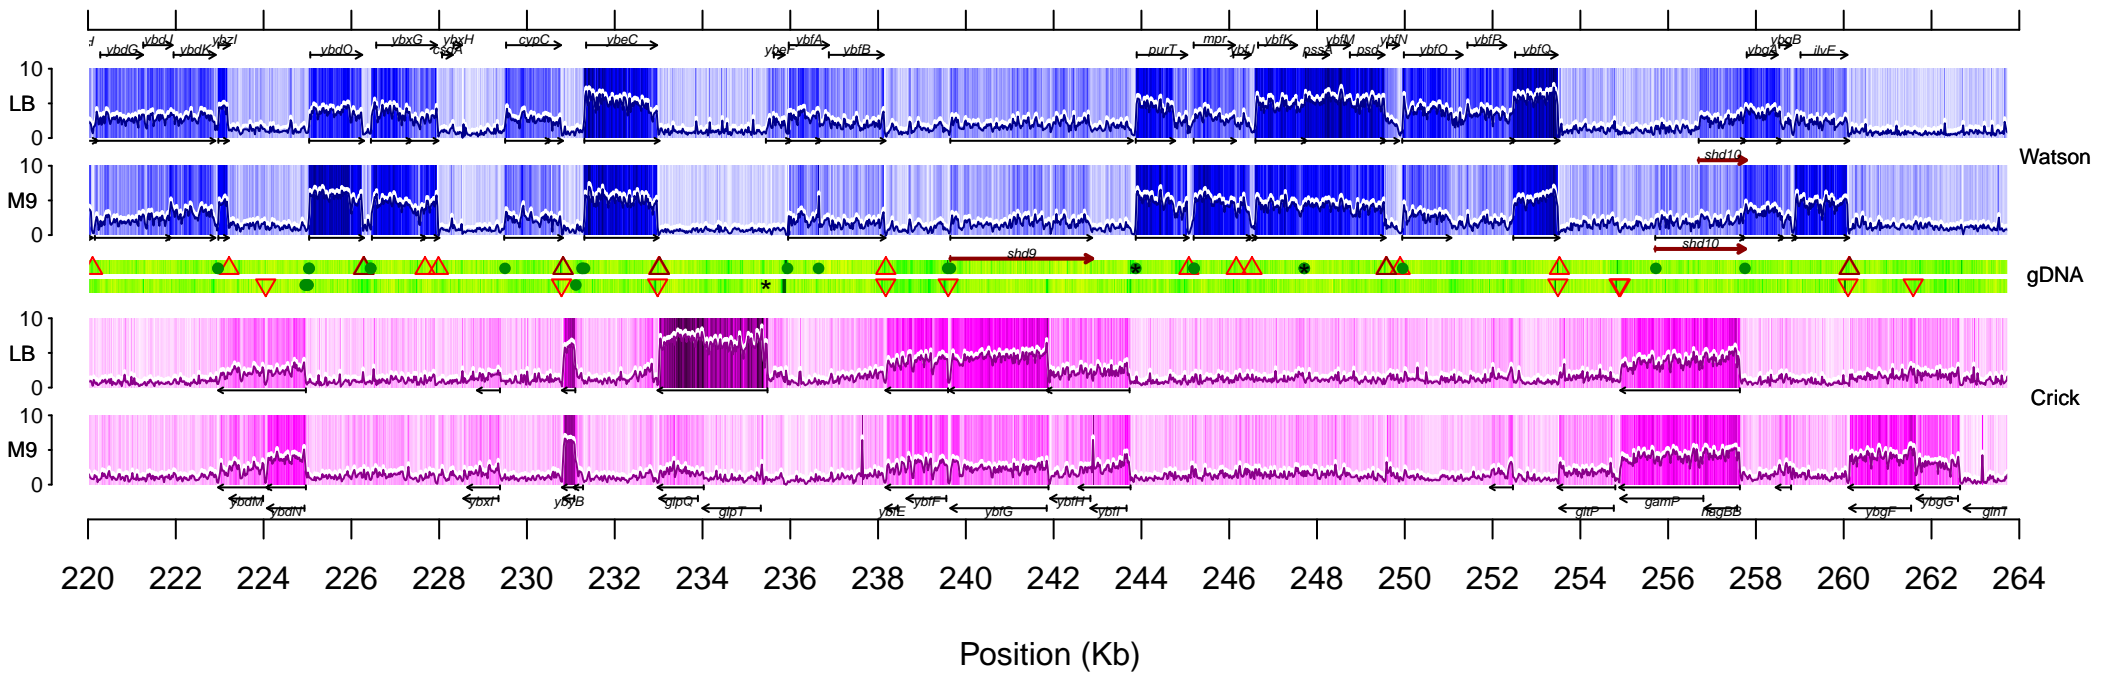

### 264 – 308 Kb

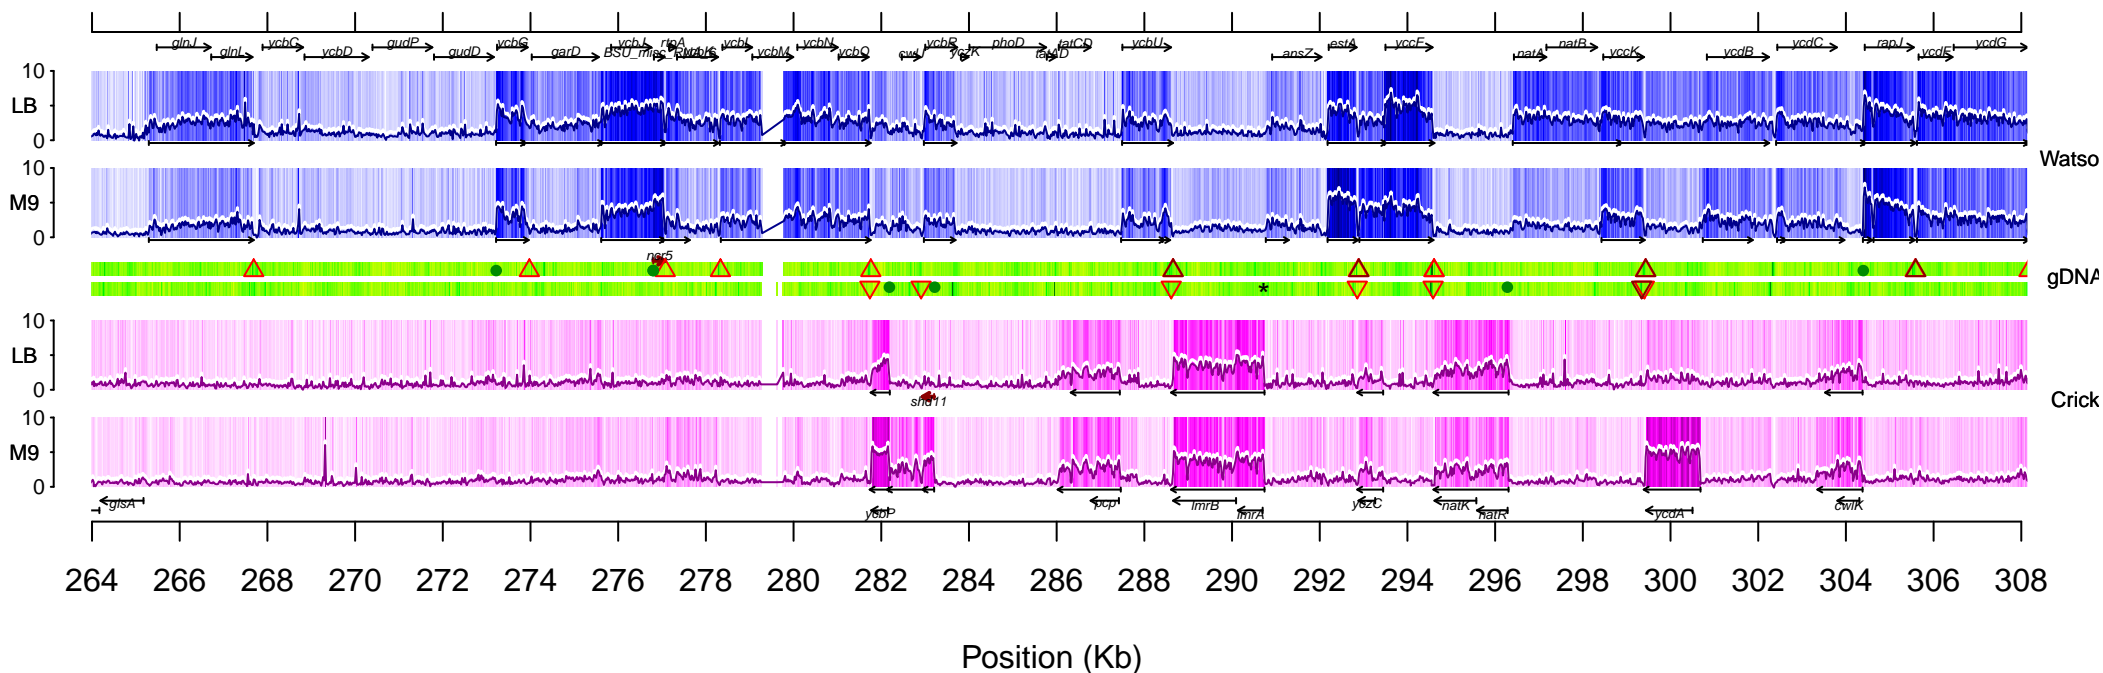

### 308 – 352 Kb

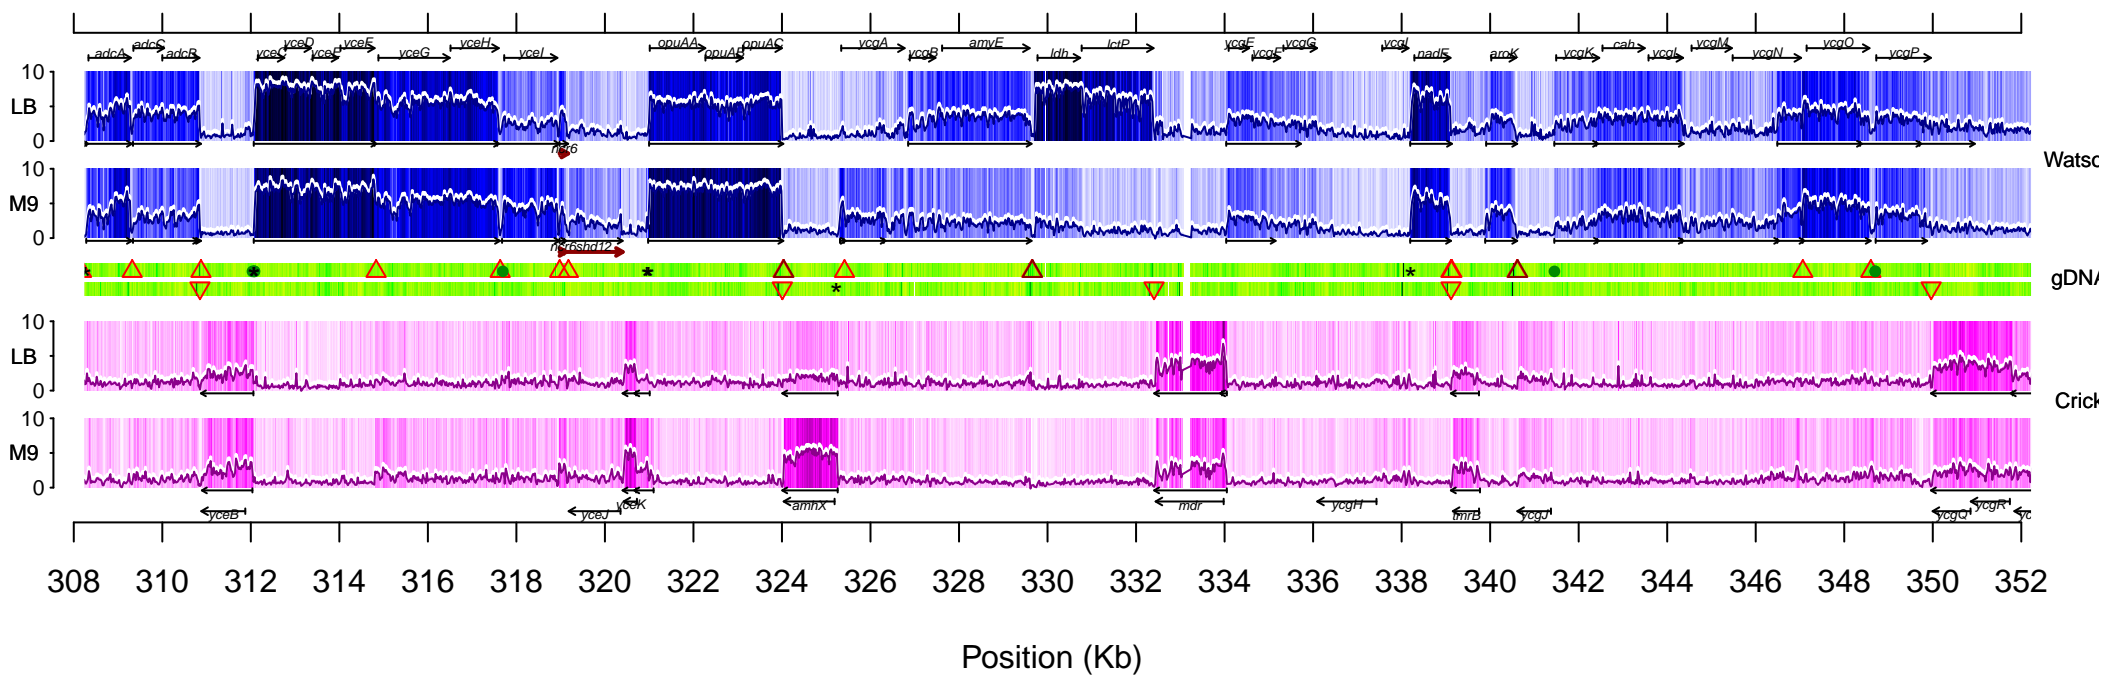

### 352 – 396 Kb

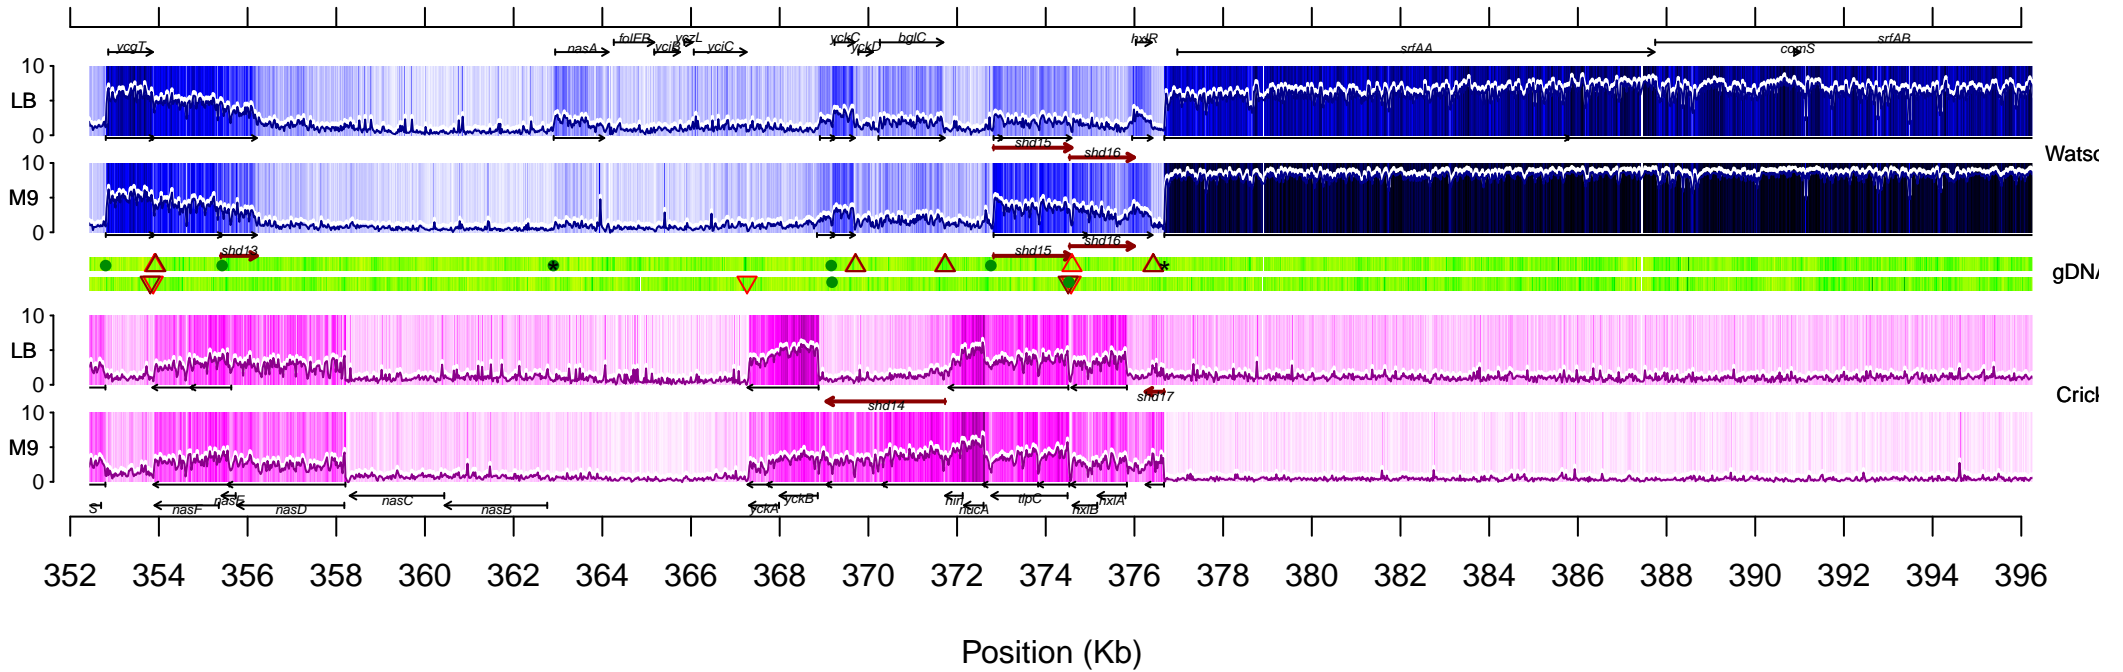

### 396 – 440 Kb

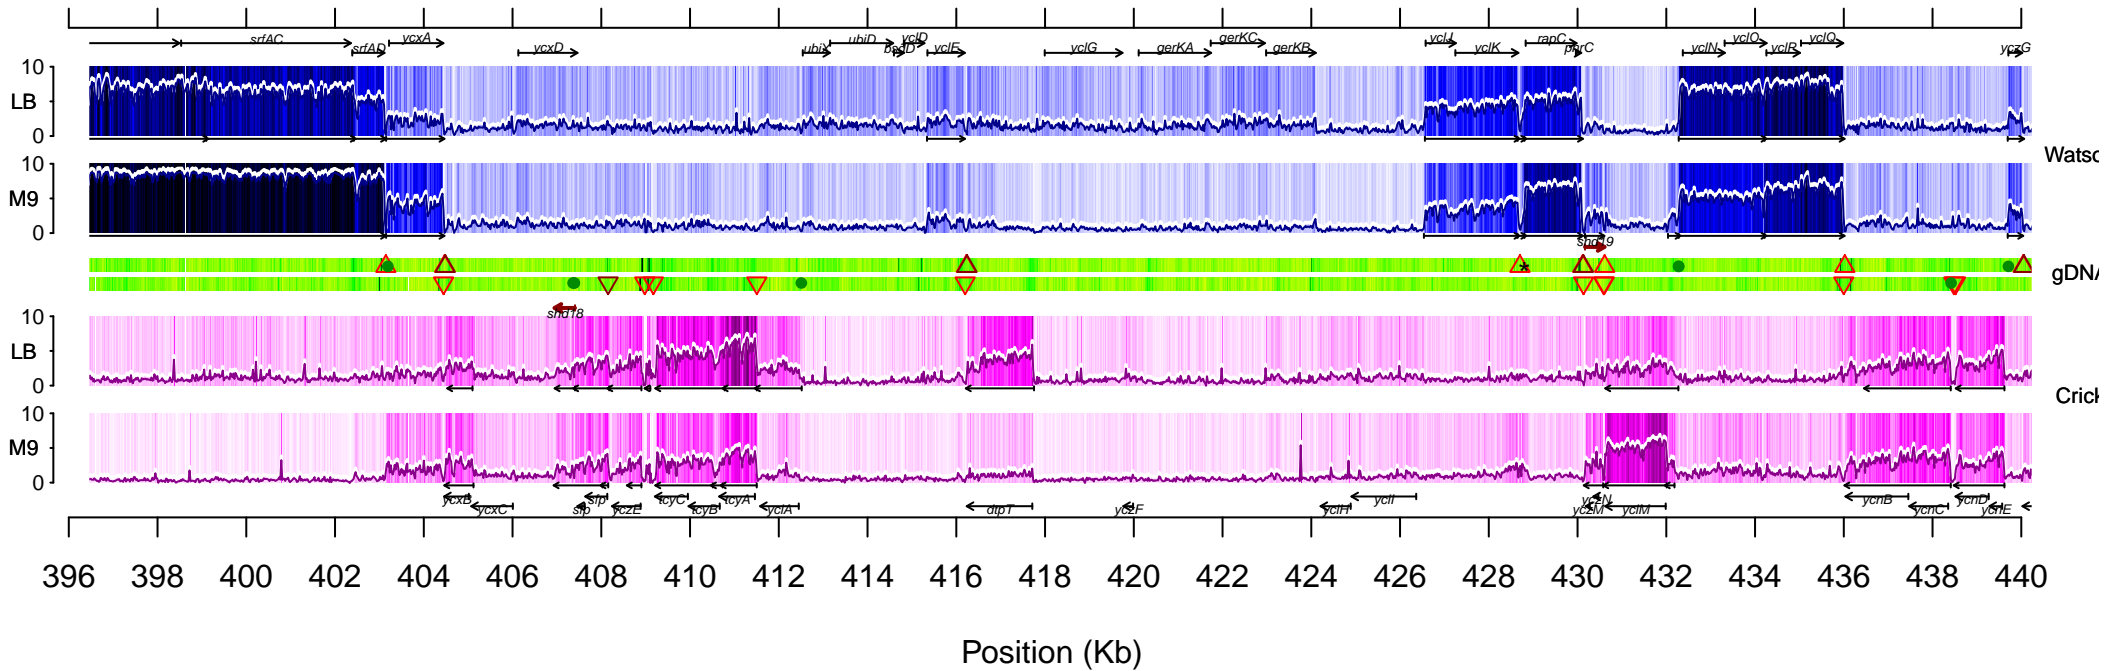

### 440 – 485 Kb

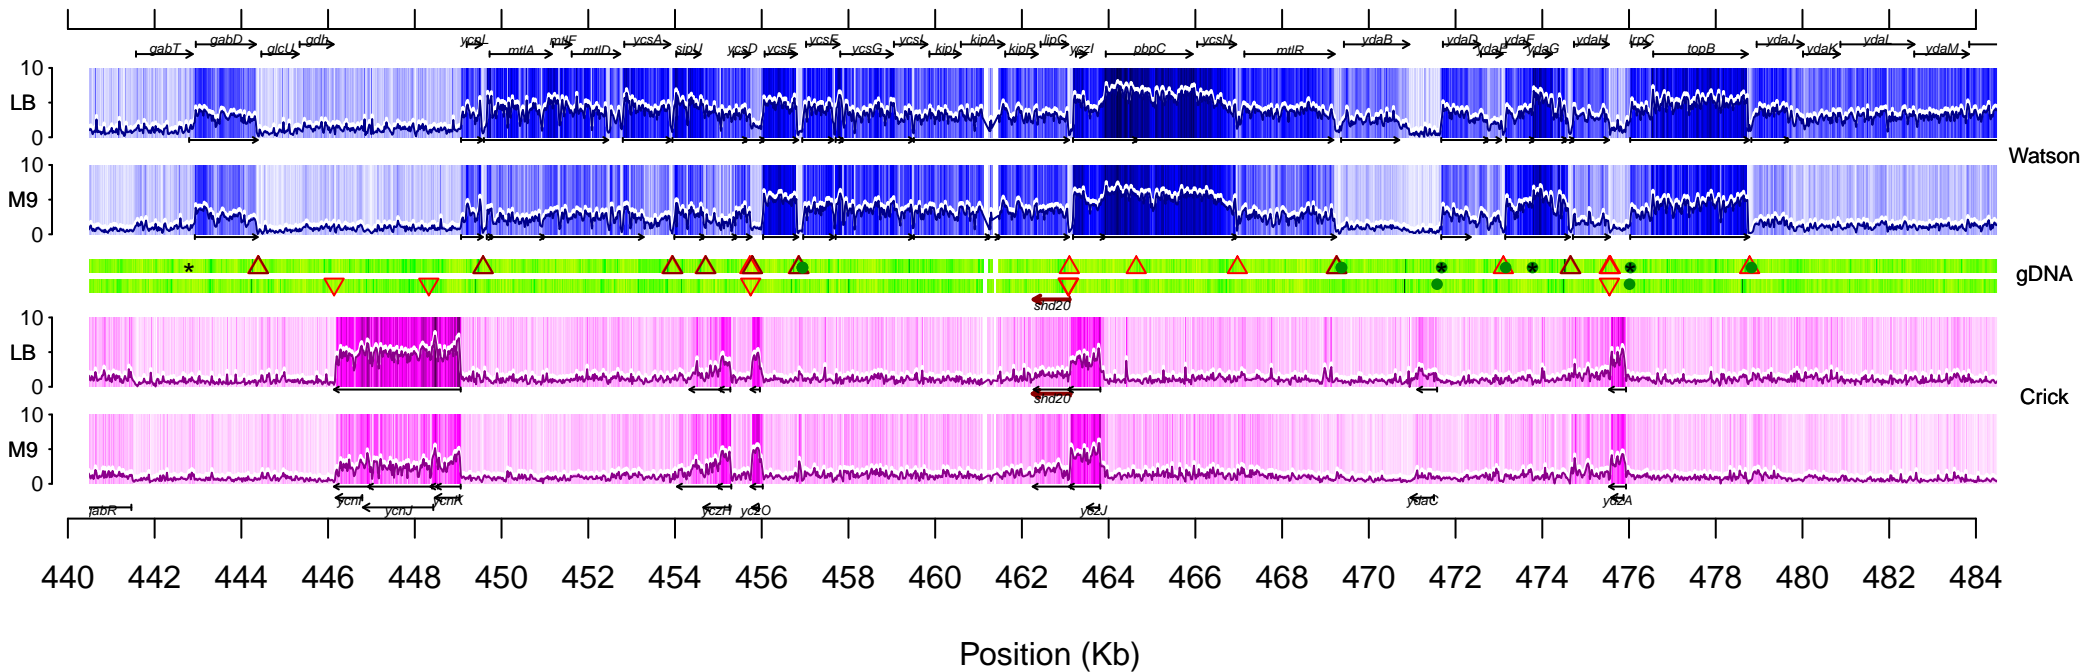

### 485 – 529 Kb

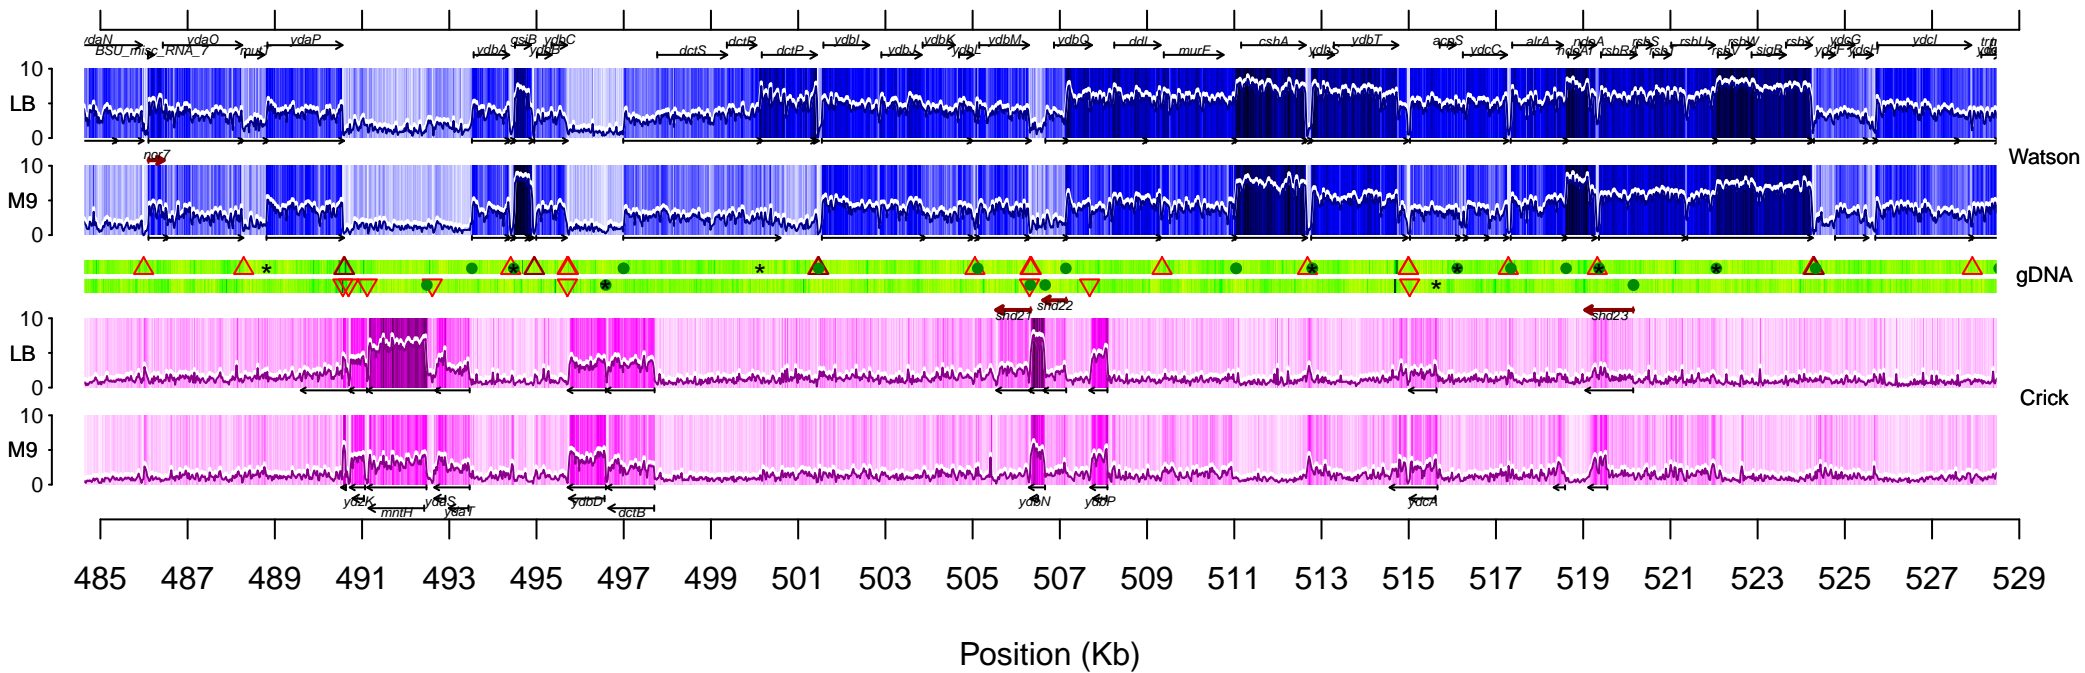

### 529 – 573 Kb

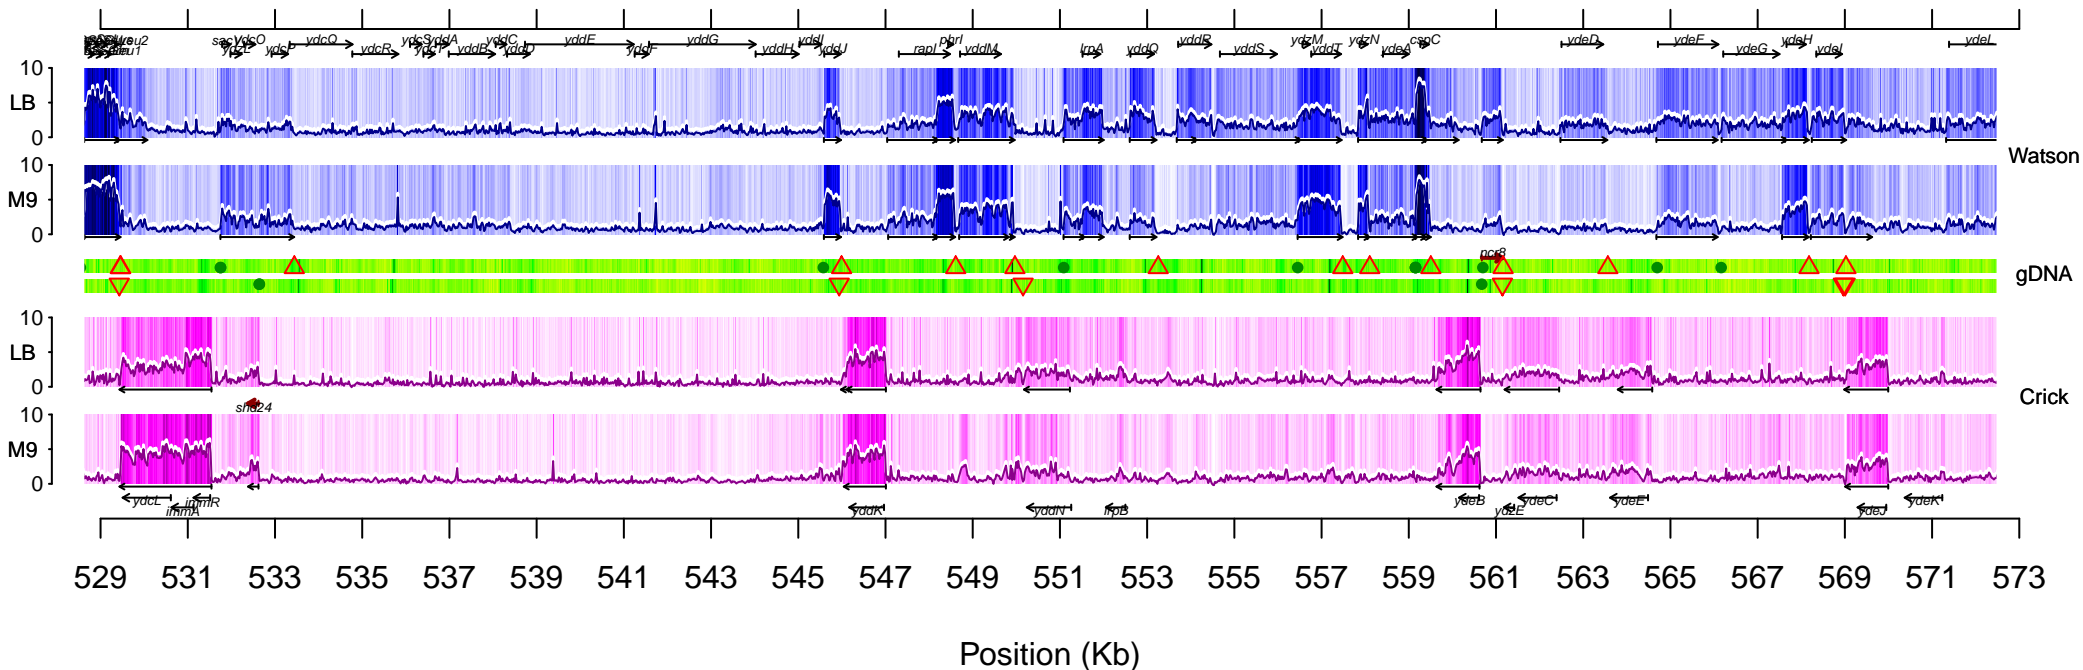

### 573 – 616 Kb

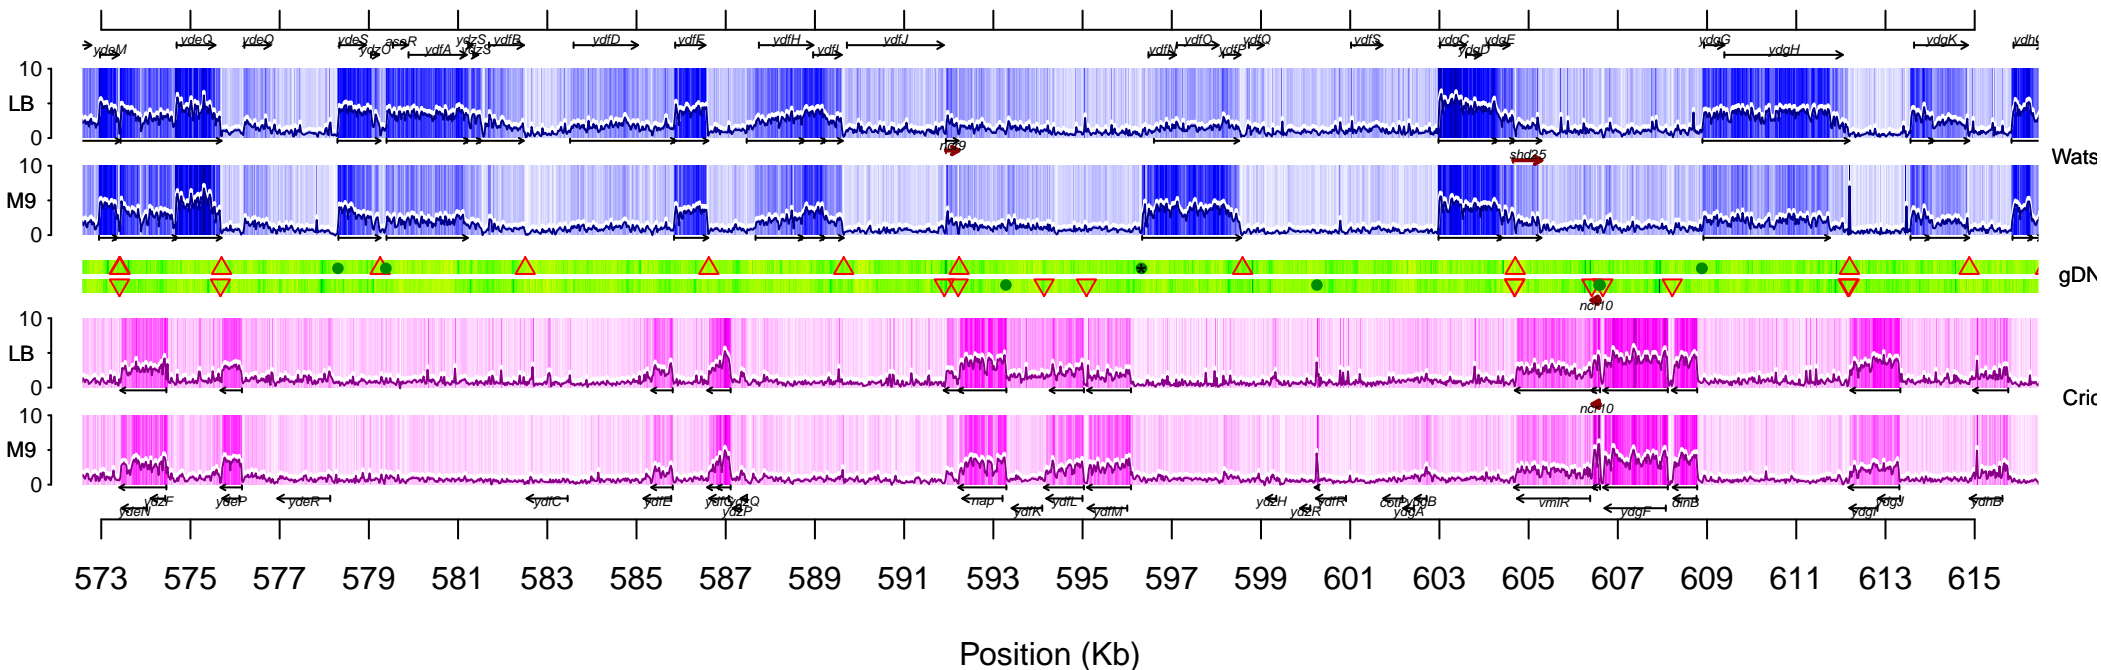





### 705 – 749 Kb

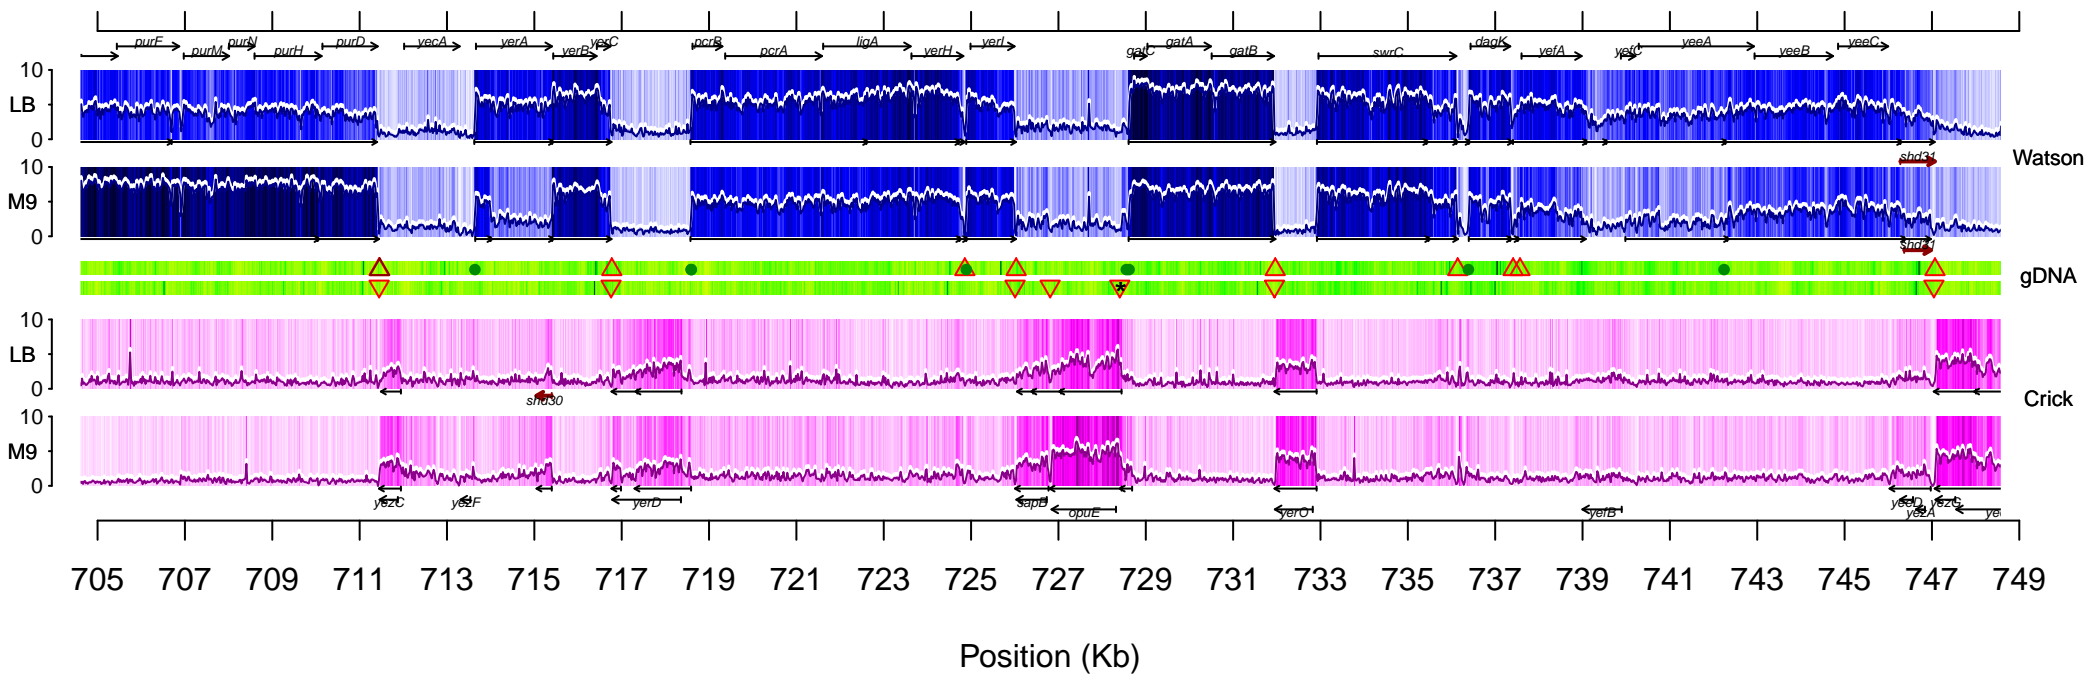

### 749 – 793 Kb

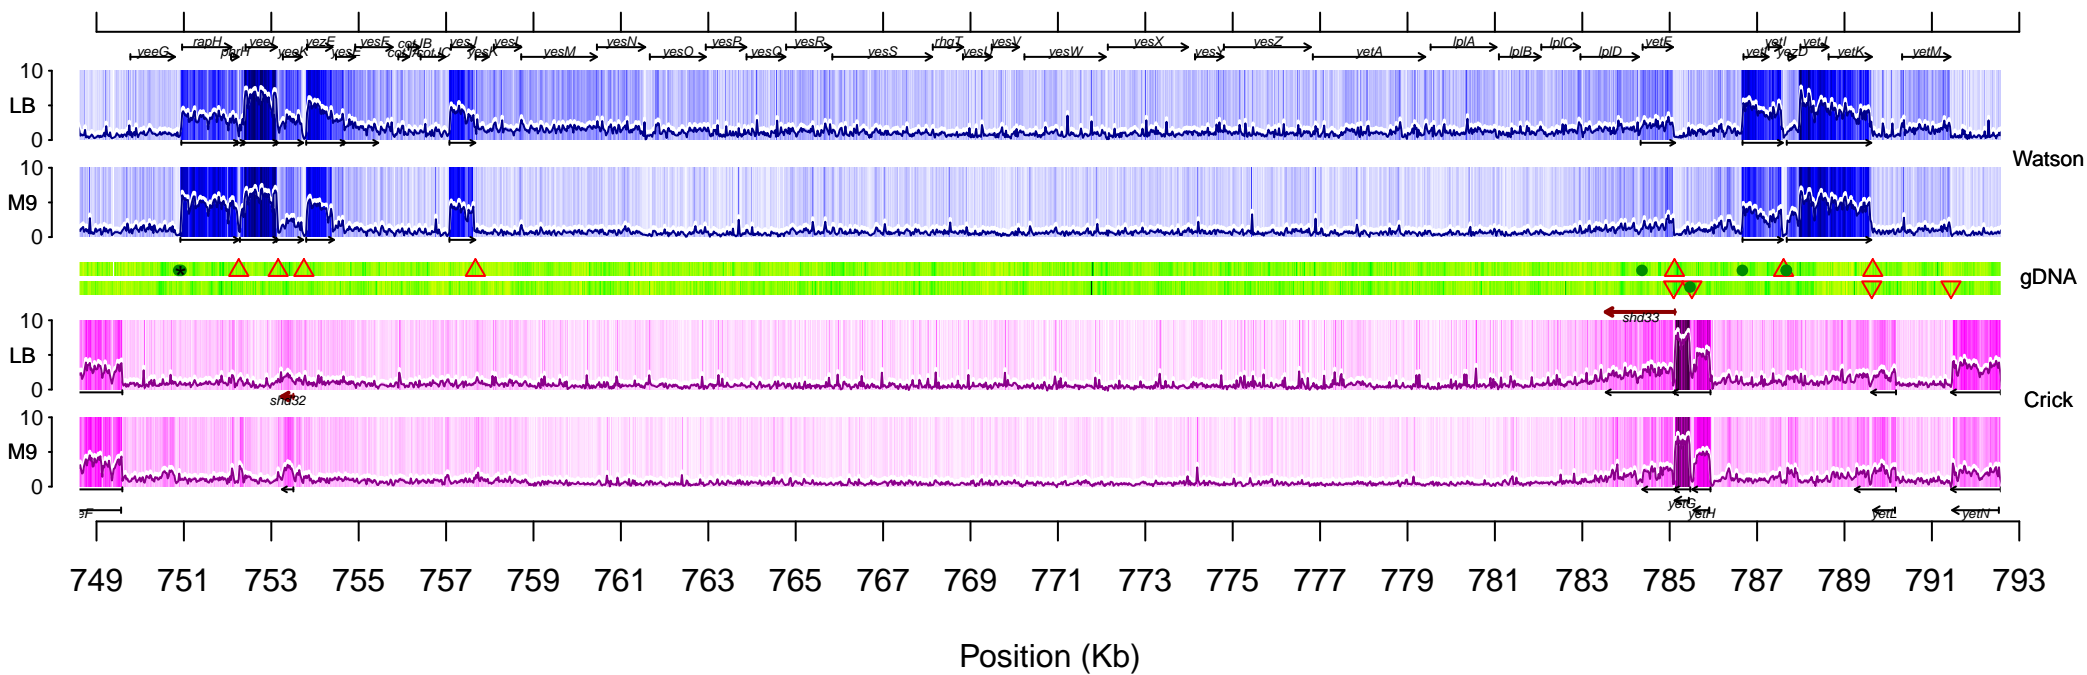

### 793 – 837 Kb

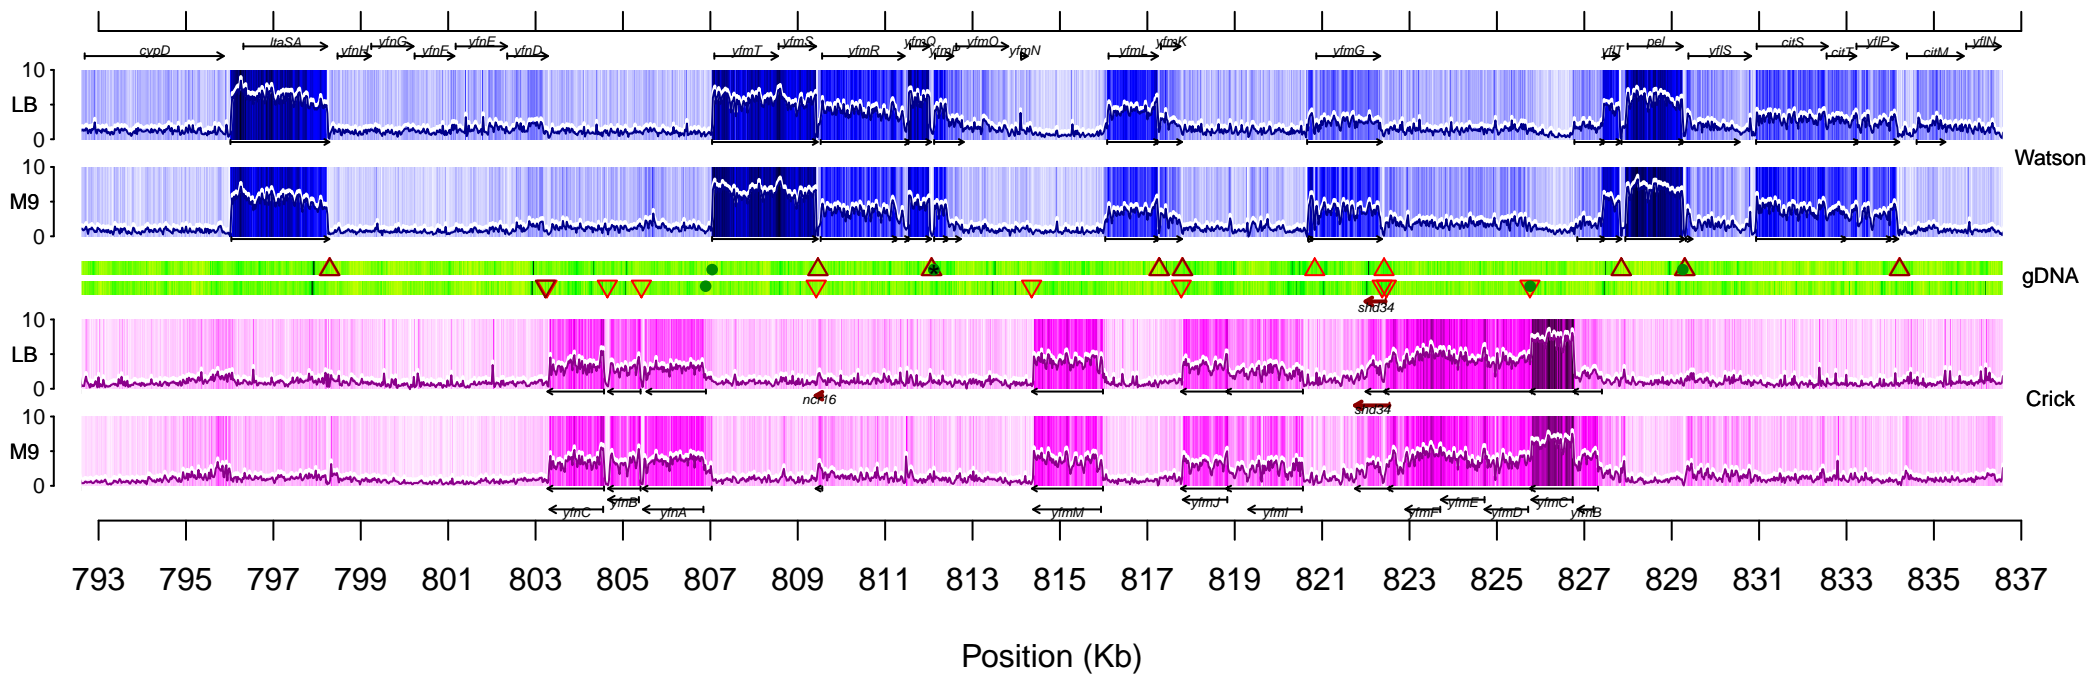

### 837 – 881 Kb

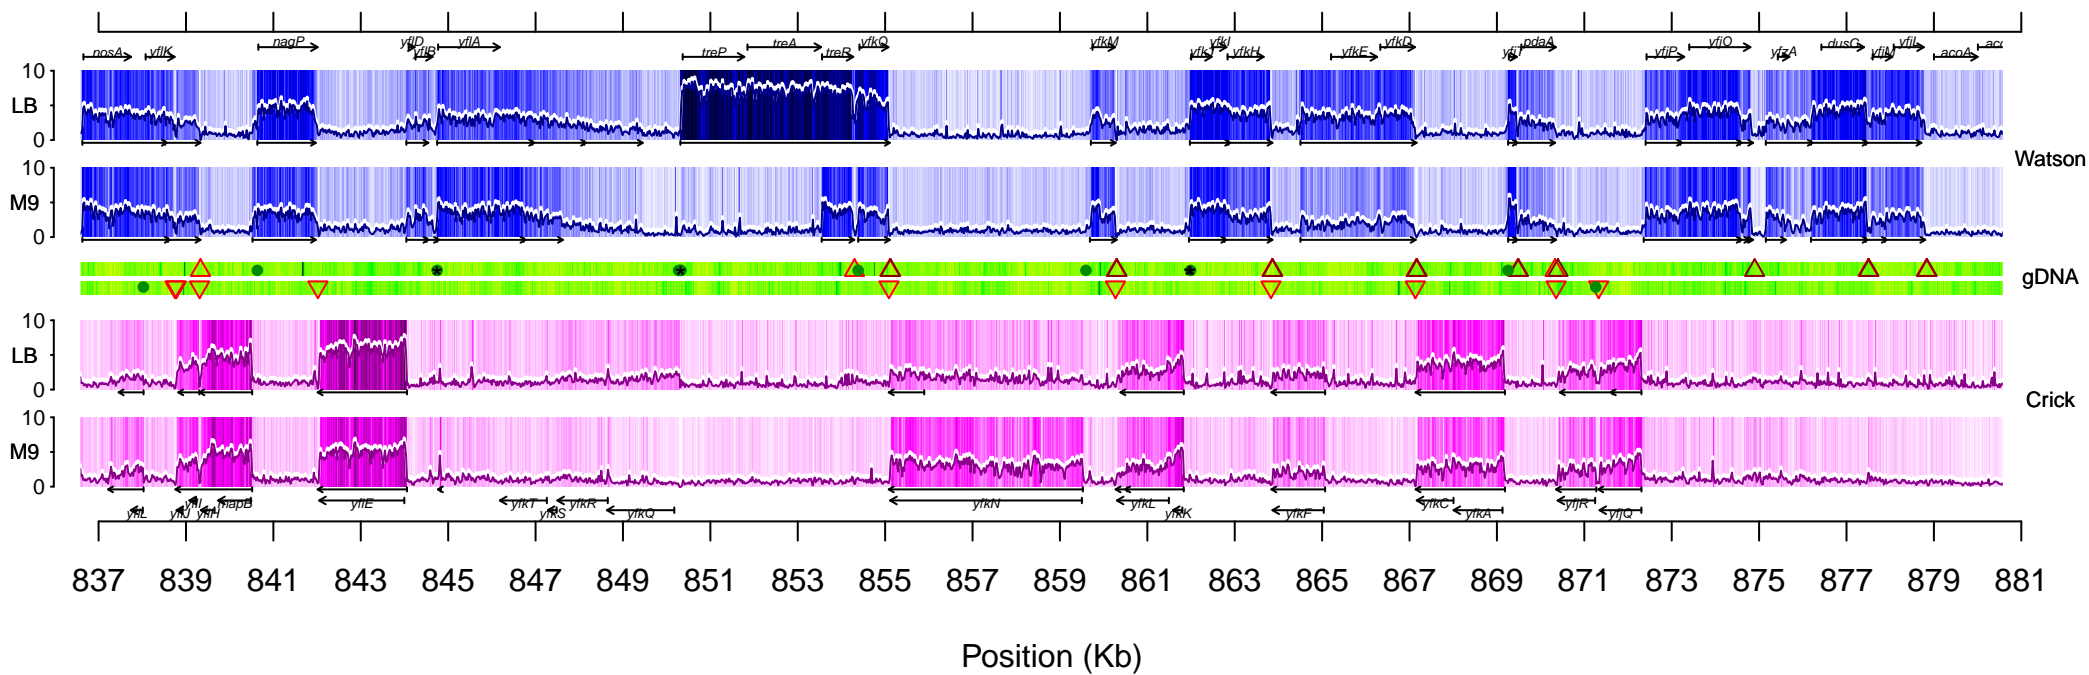

### 881 – 924 Kb

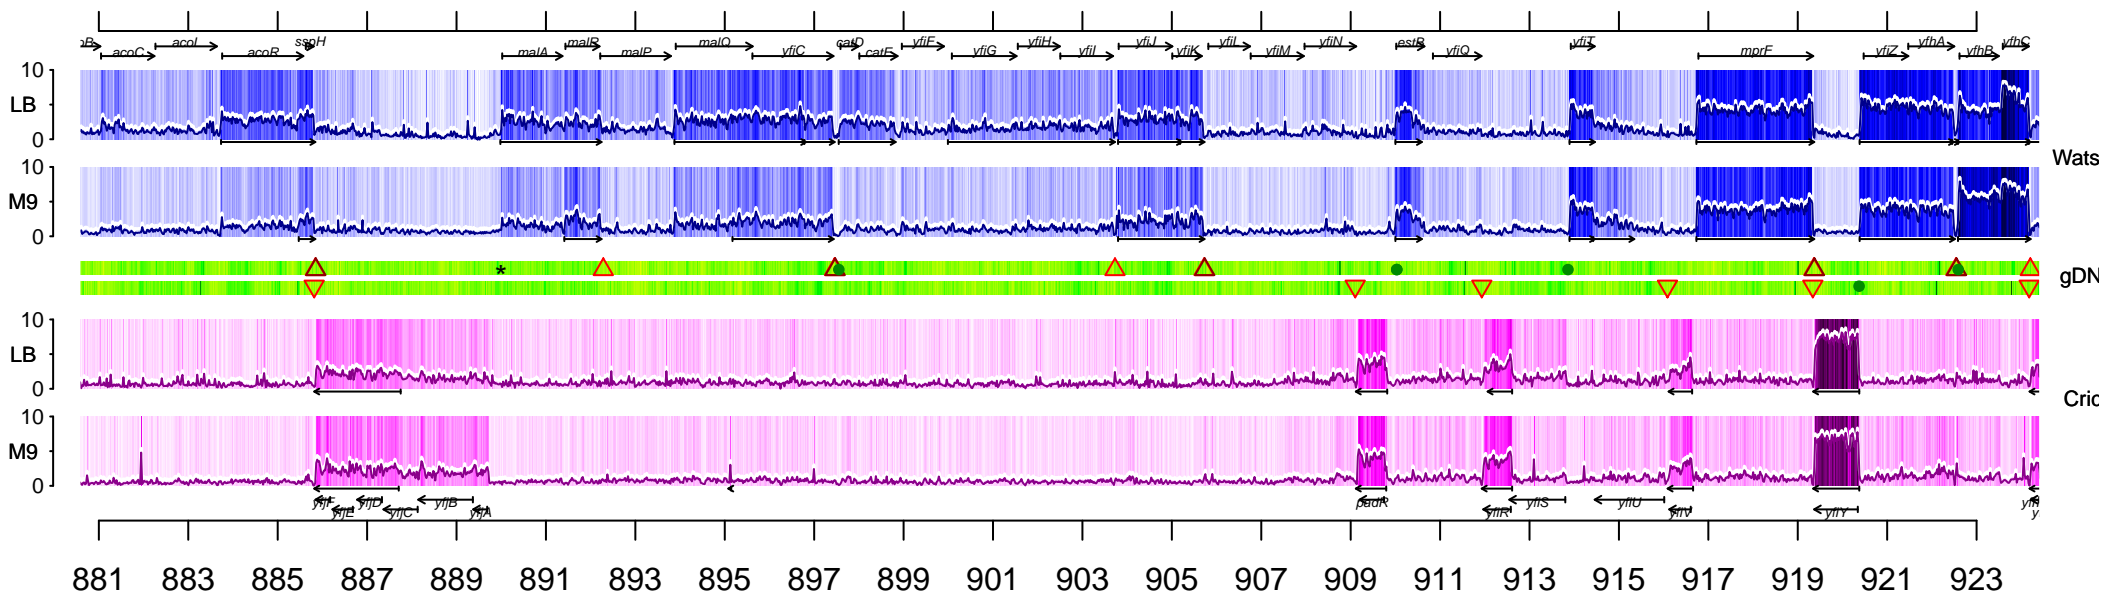

Position (Kb)

### 924 – 968 Kb

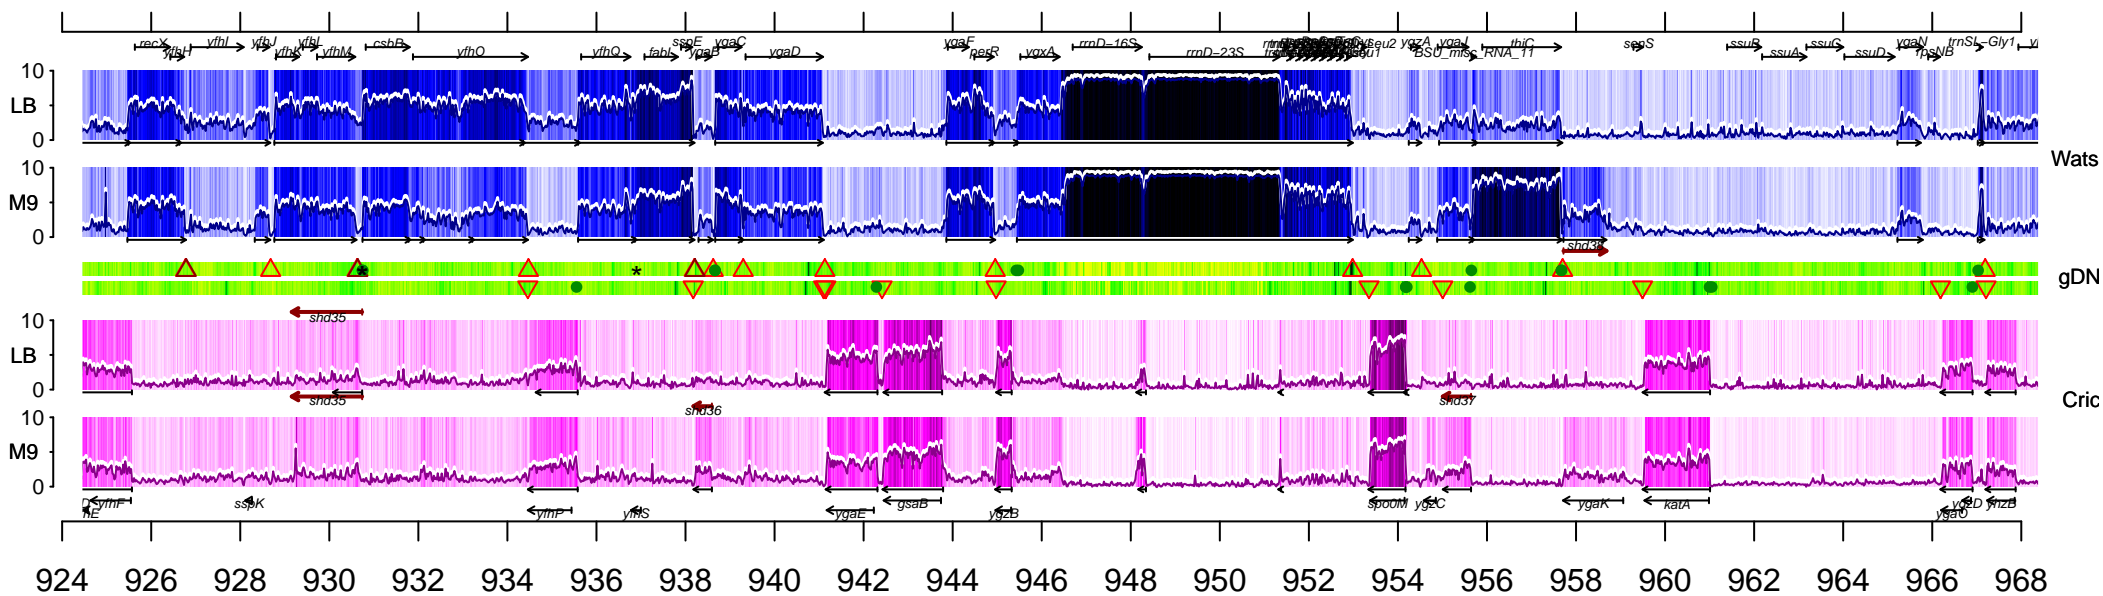

Position (Kb)

### 968 – 1012 Kb

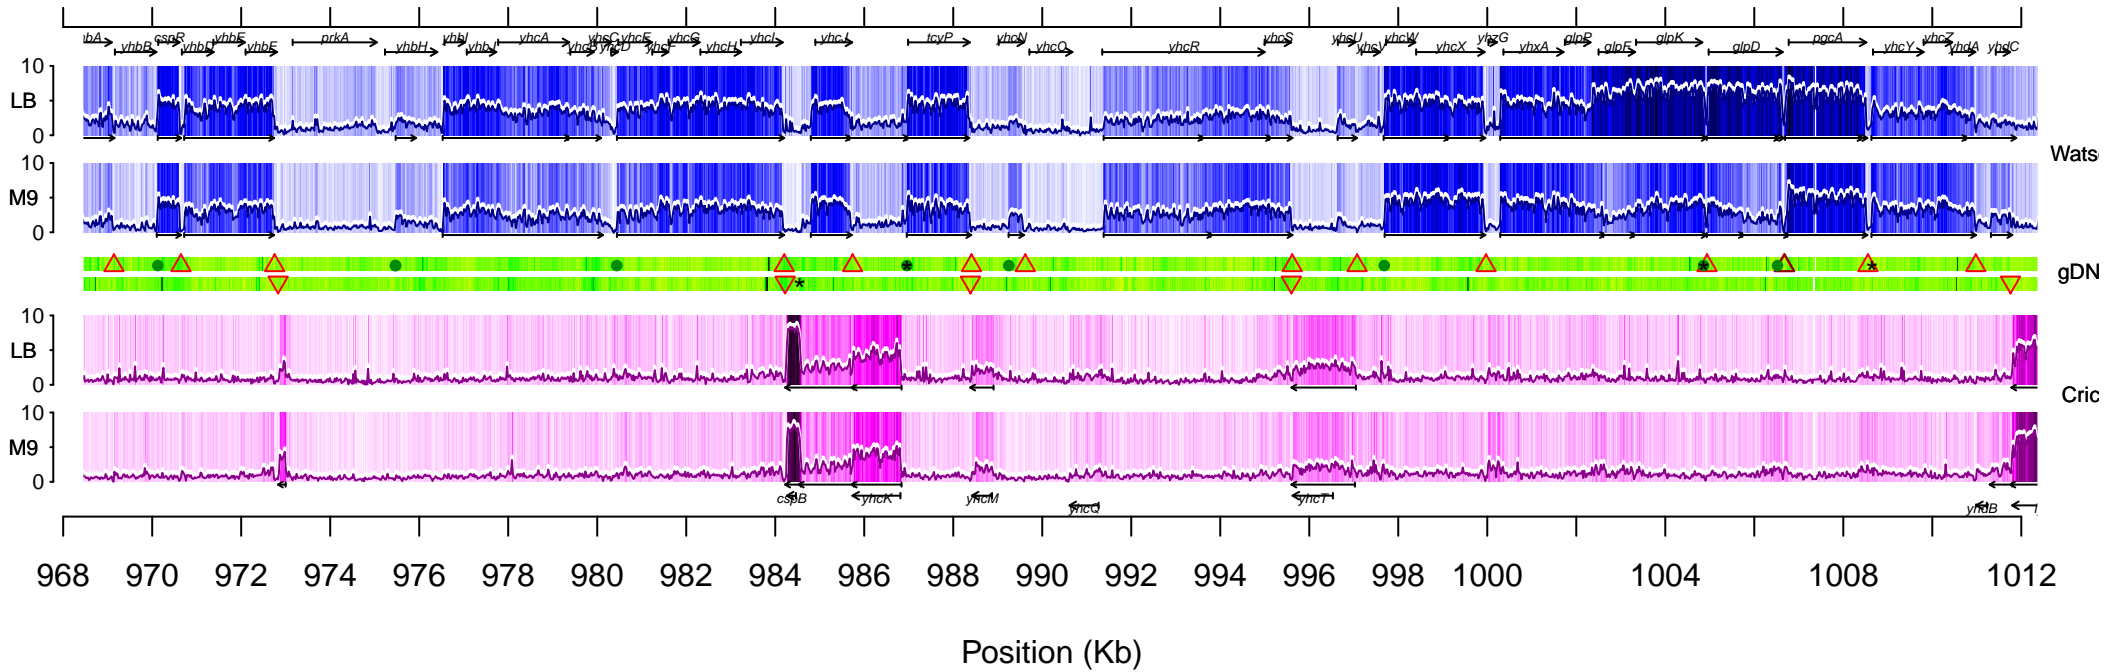

### 1012 – 1056 Kb

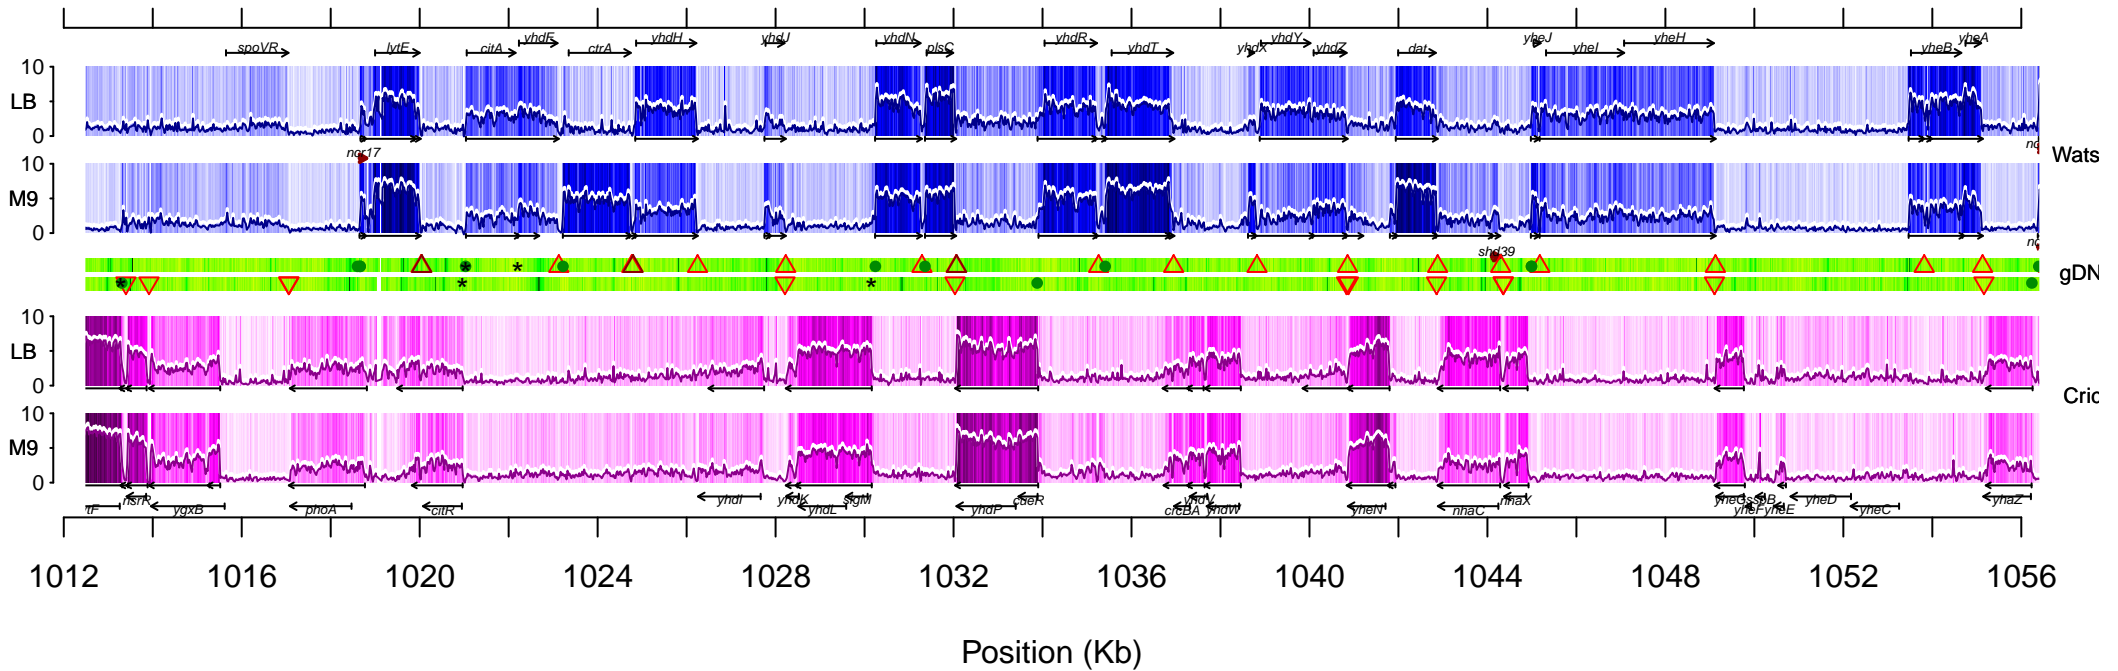

### 1056 – 1100 Kb

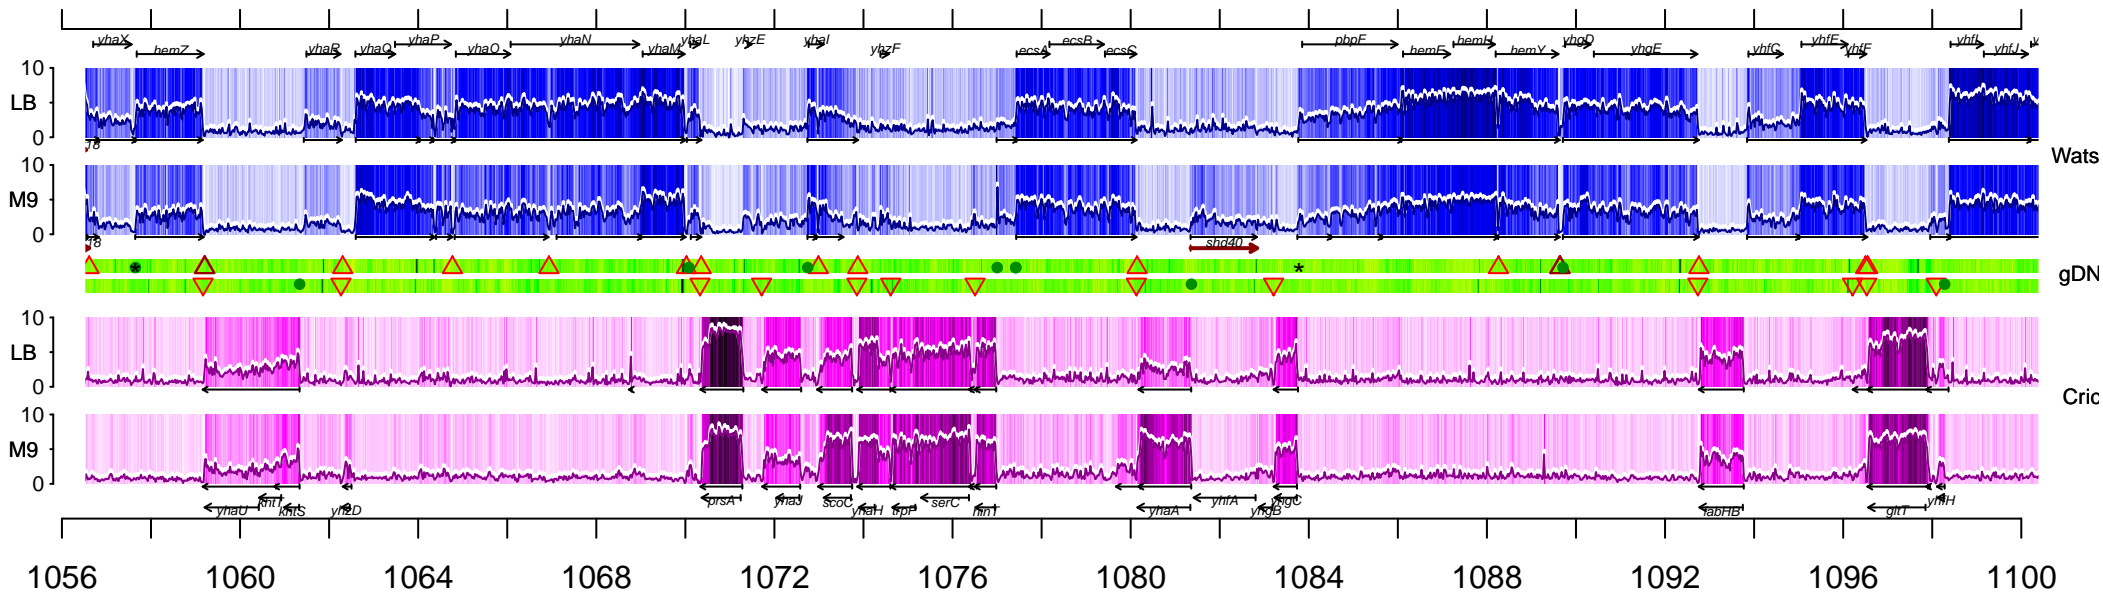

Position (Kb)

### 1100 – 1144 Kb

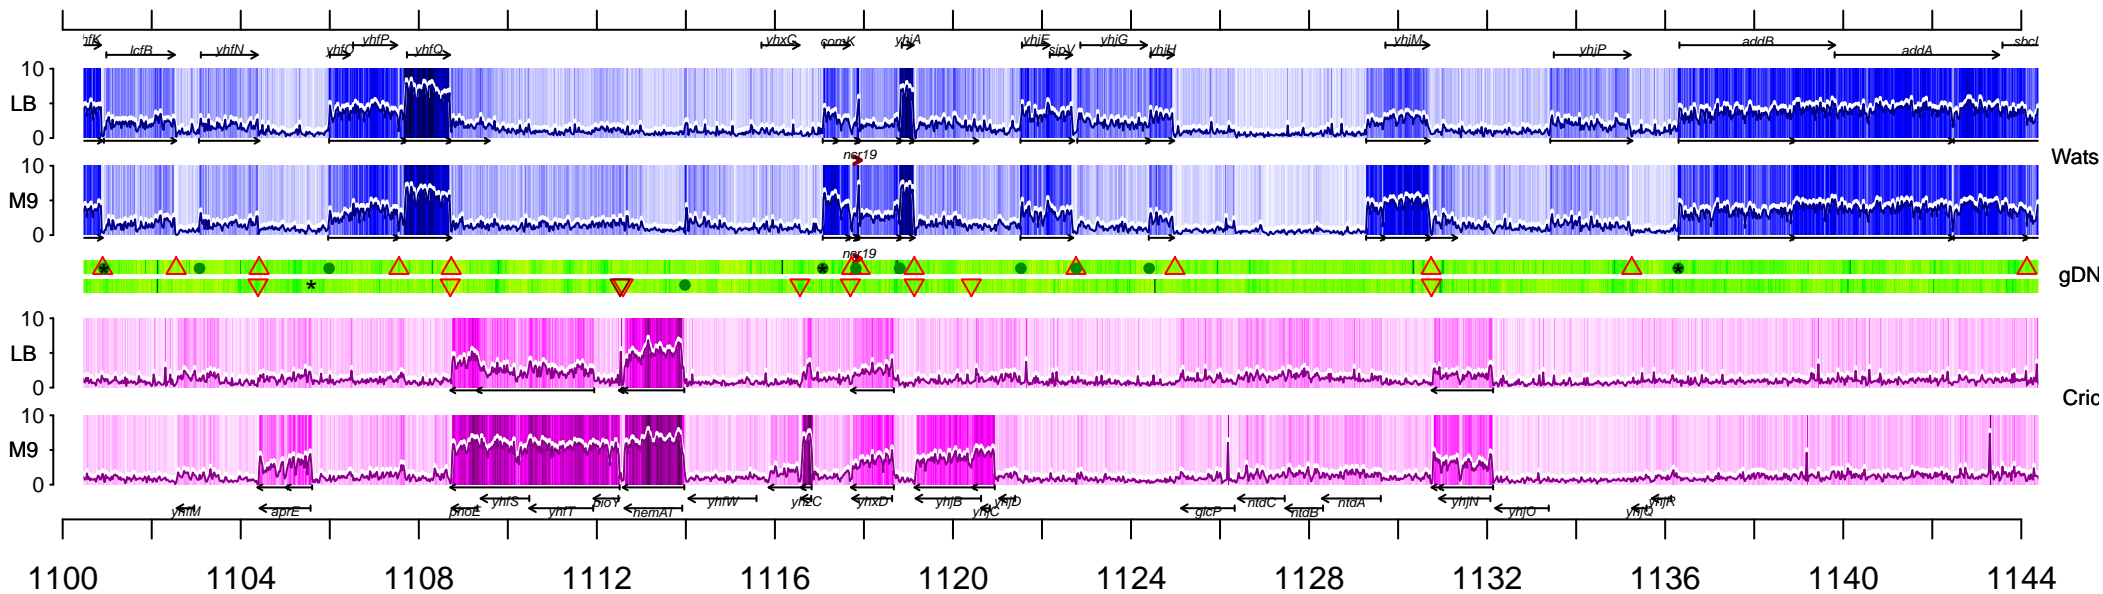

Position (Kb)

### 1144 – 1188 Kb

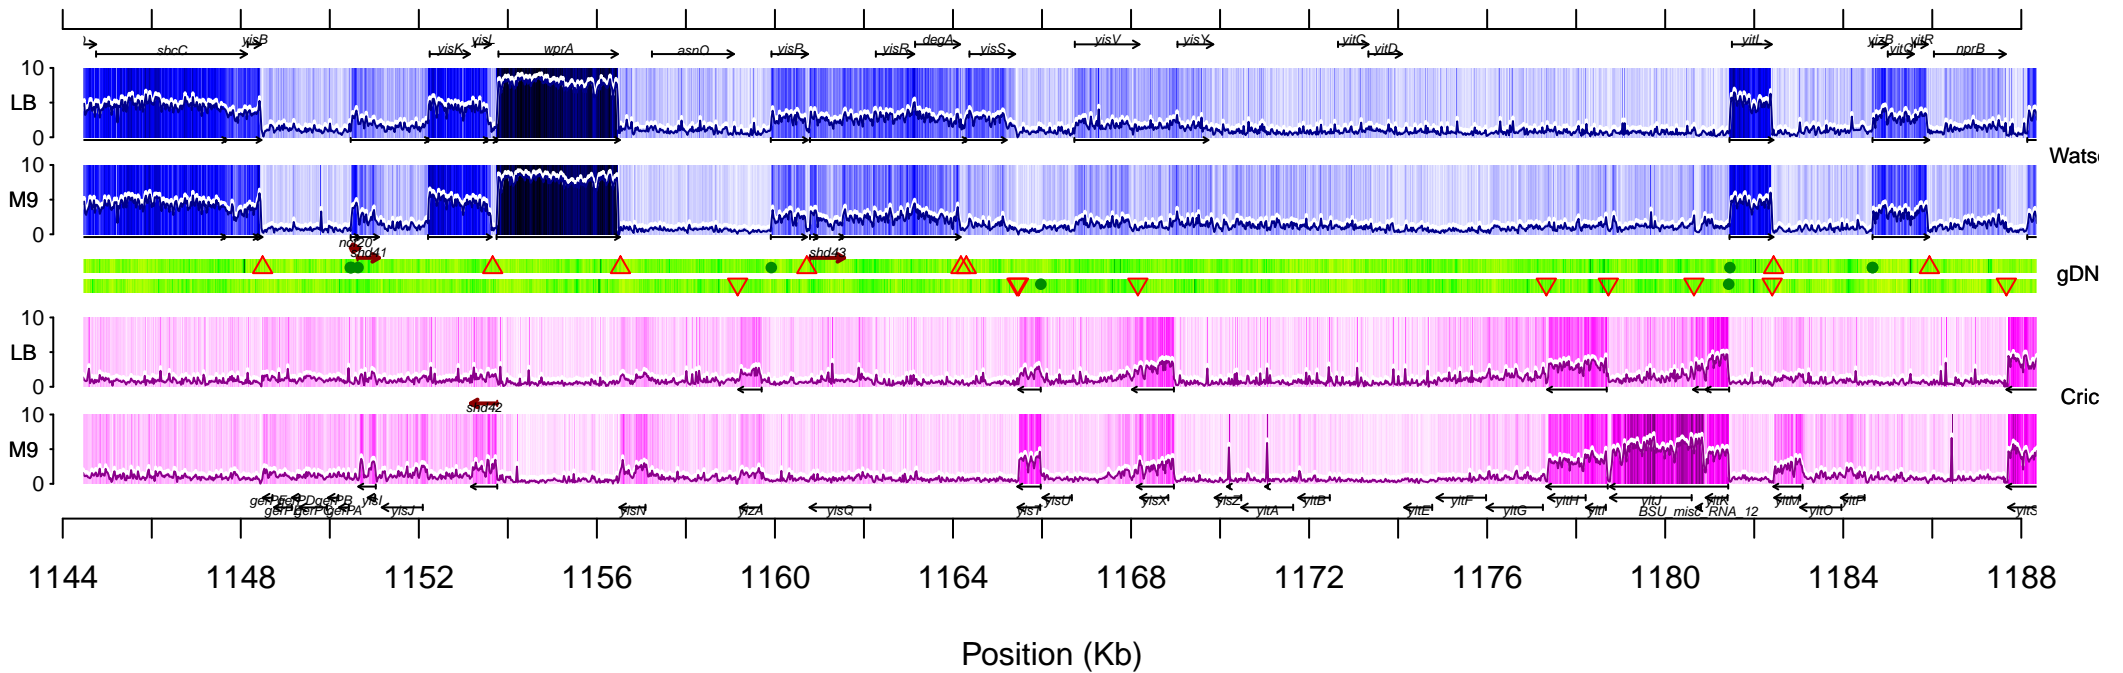

### 1188 – 1232 Kb

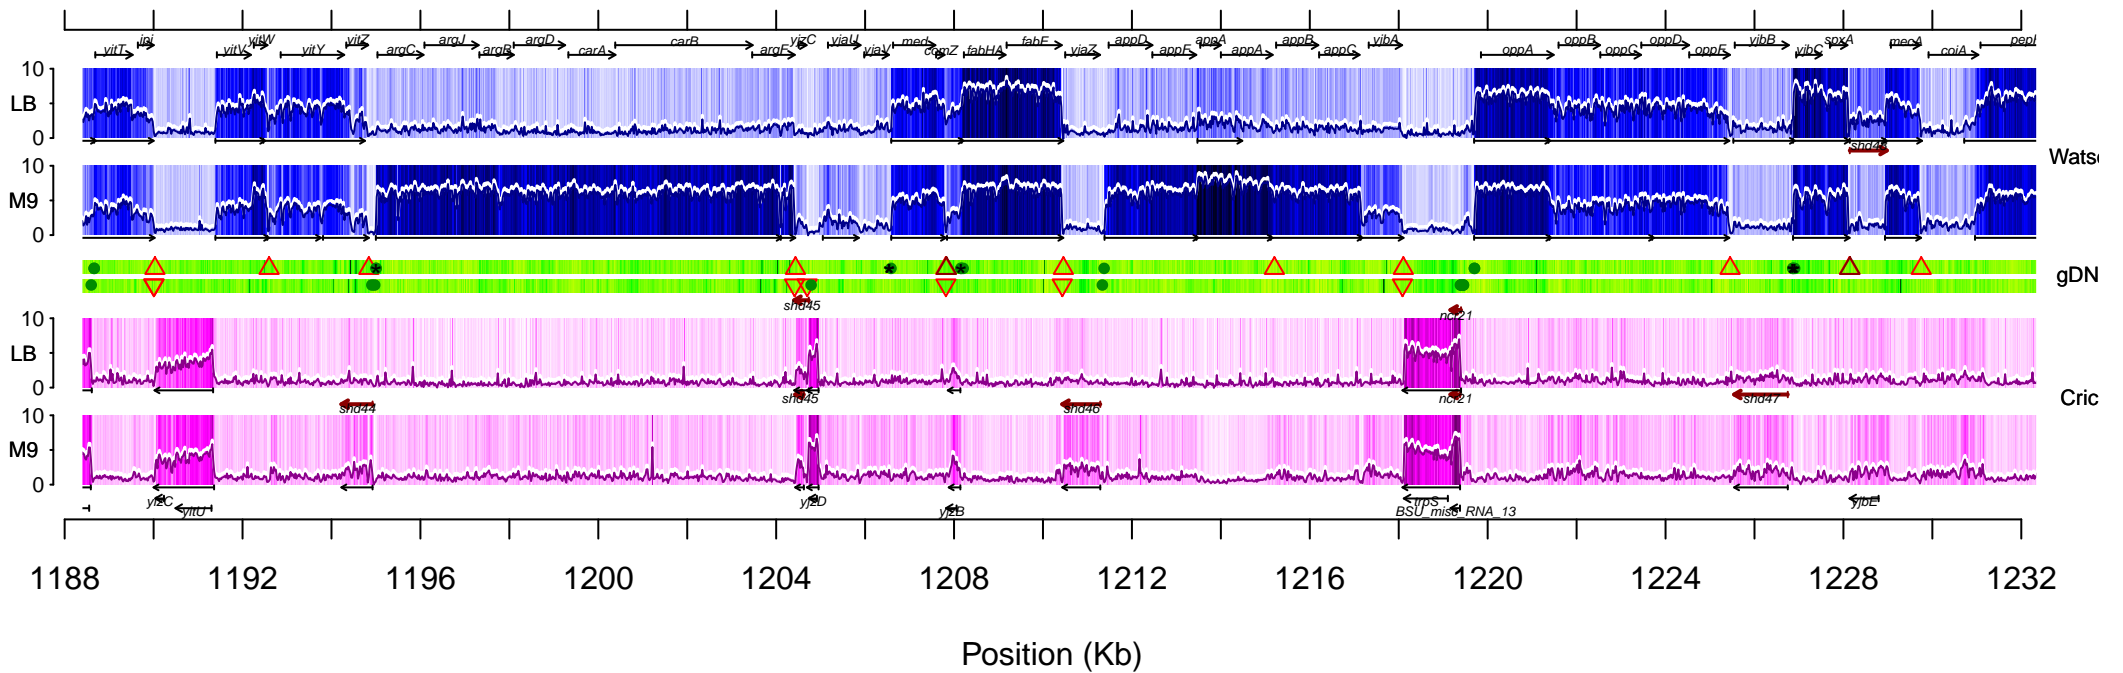

### 1232 – 1276 Kb

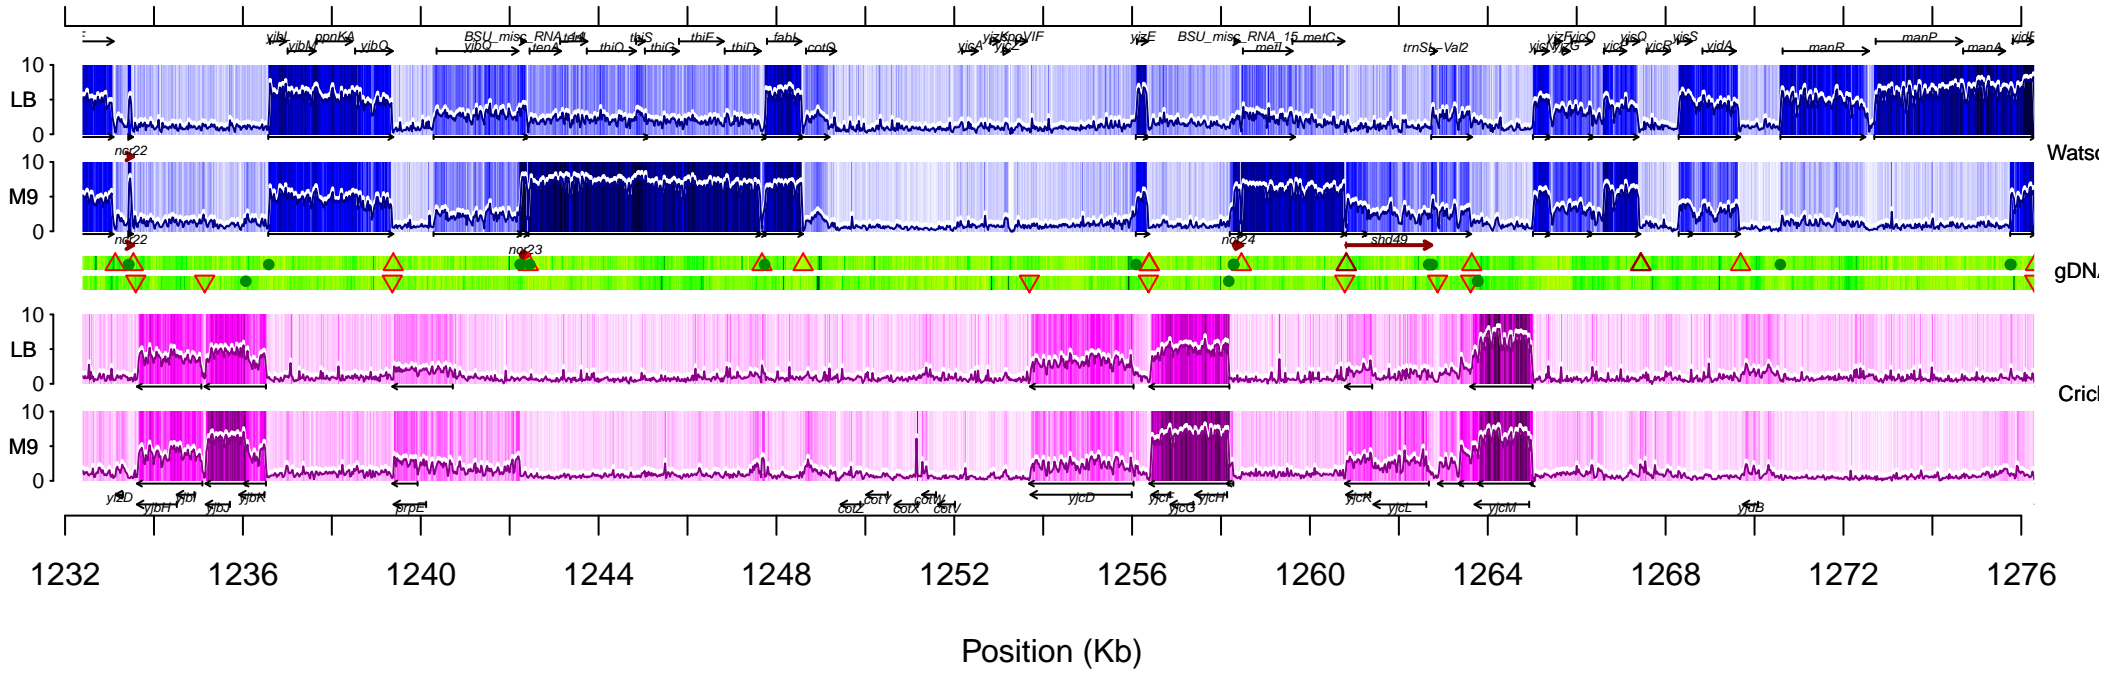

### 1276 – 1320 Kb

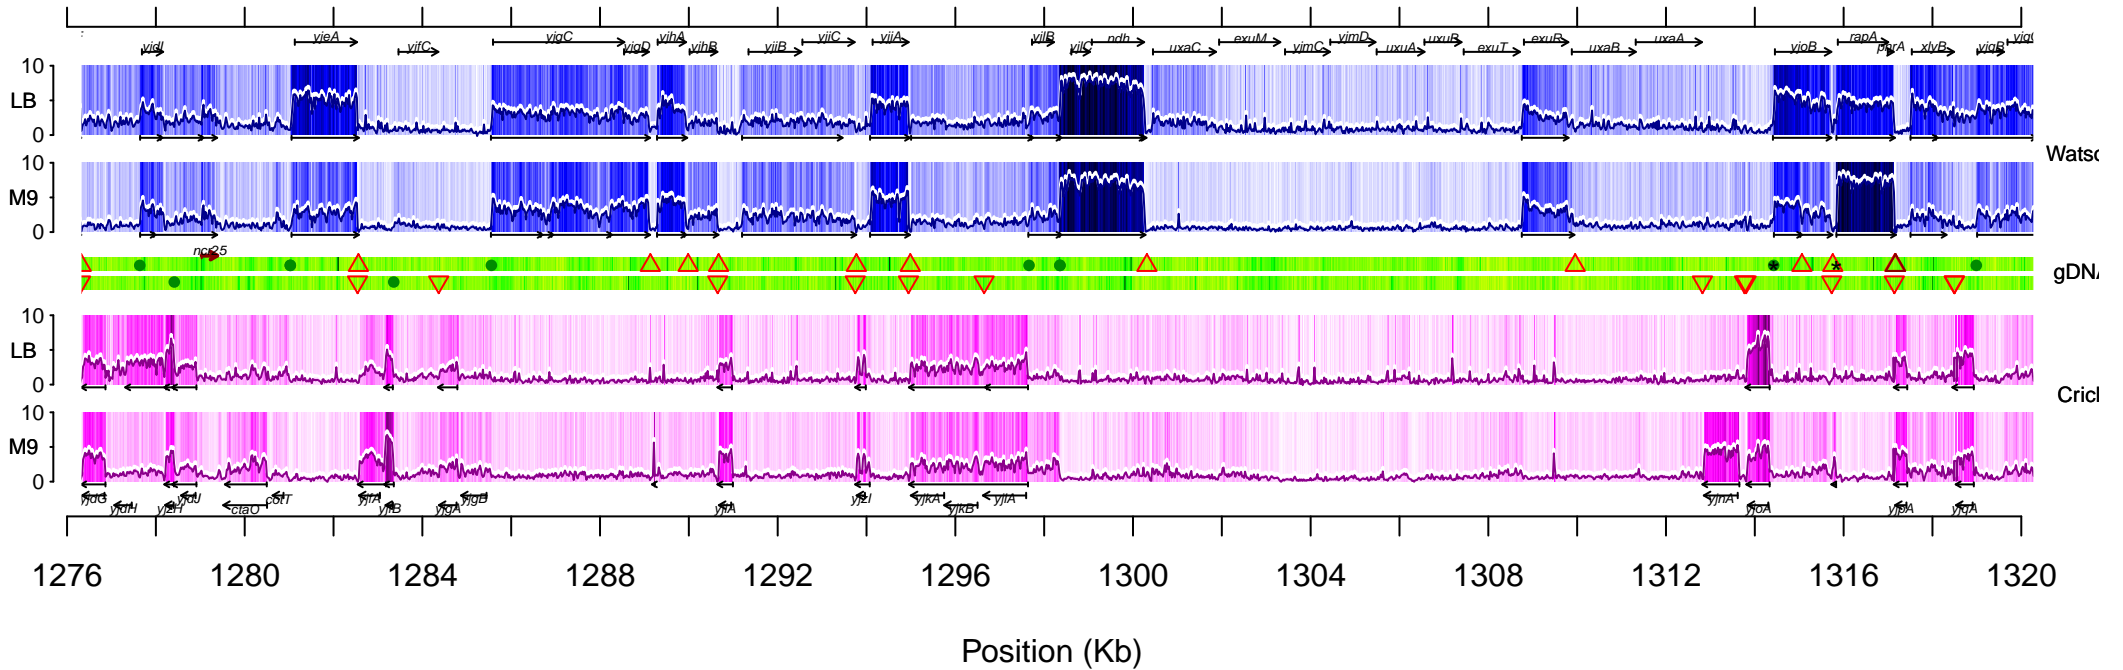



### 1320 – 1364 Kb

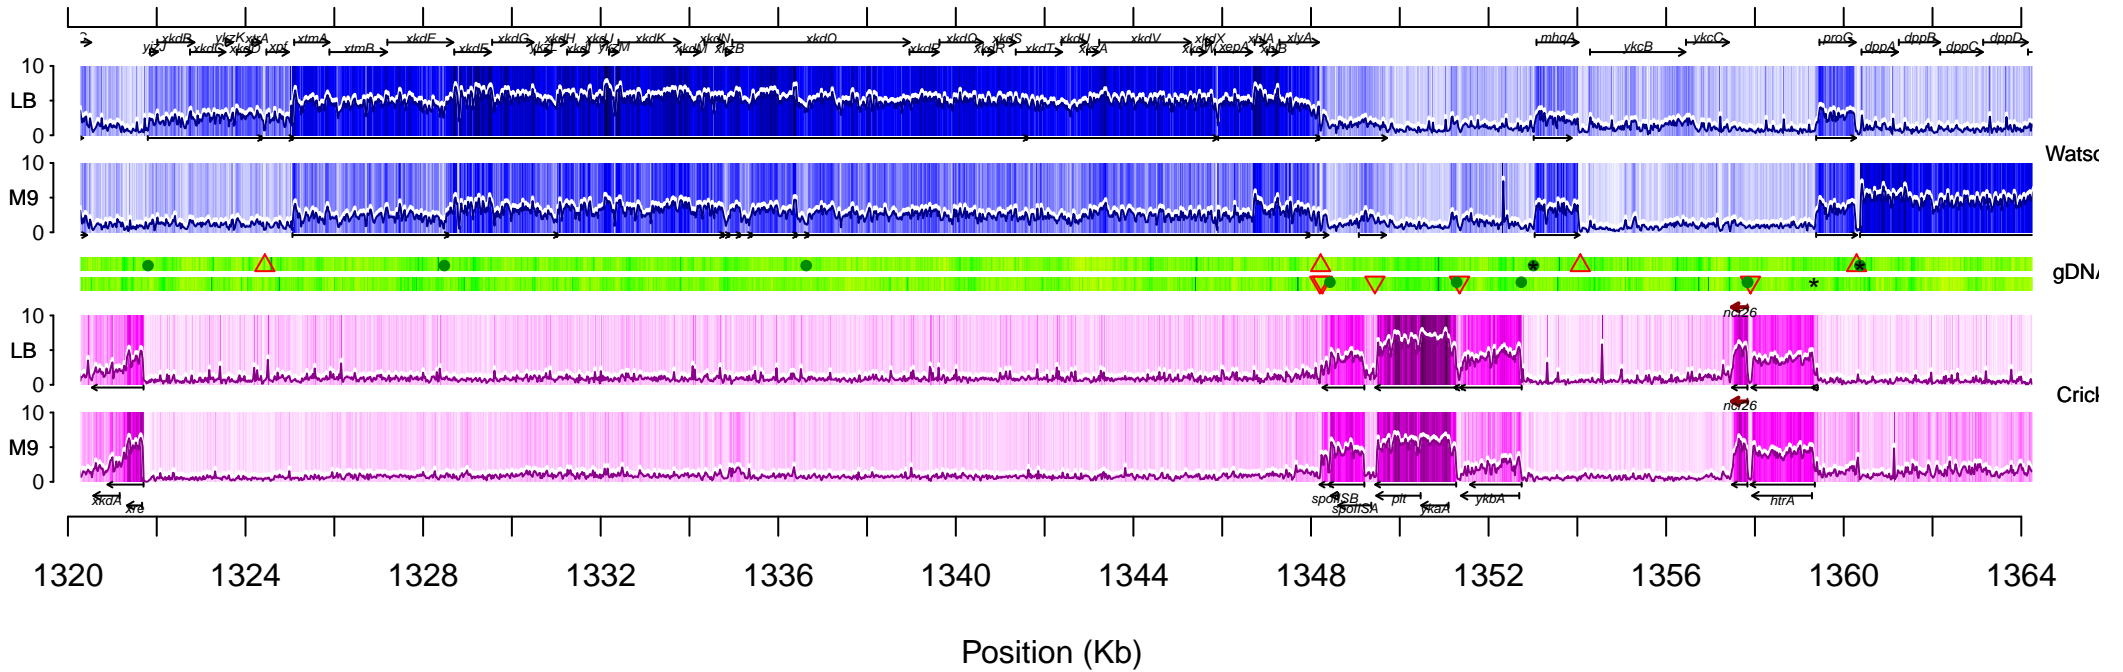

### 1364 – 1408 Kb

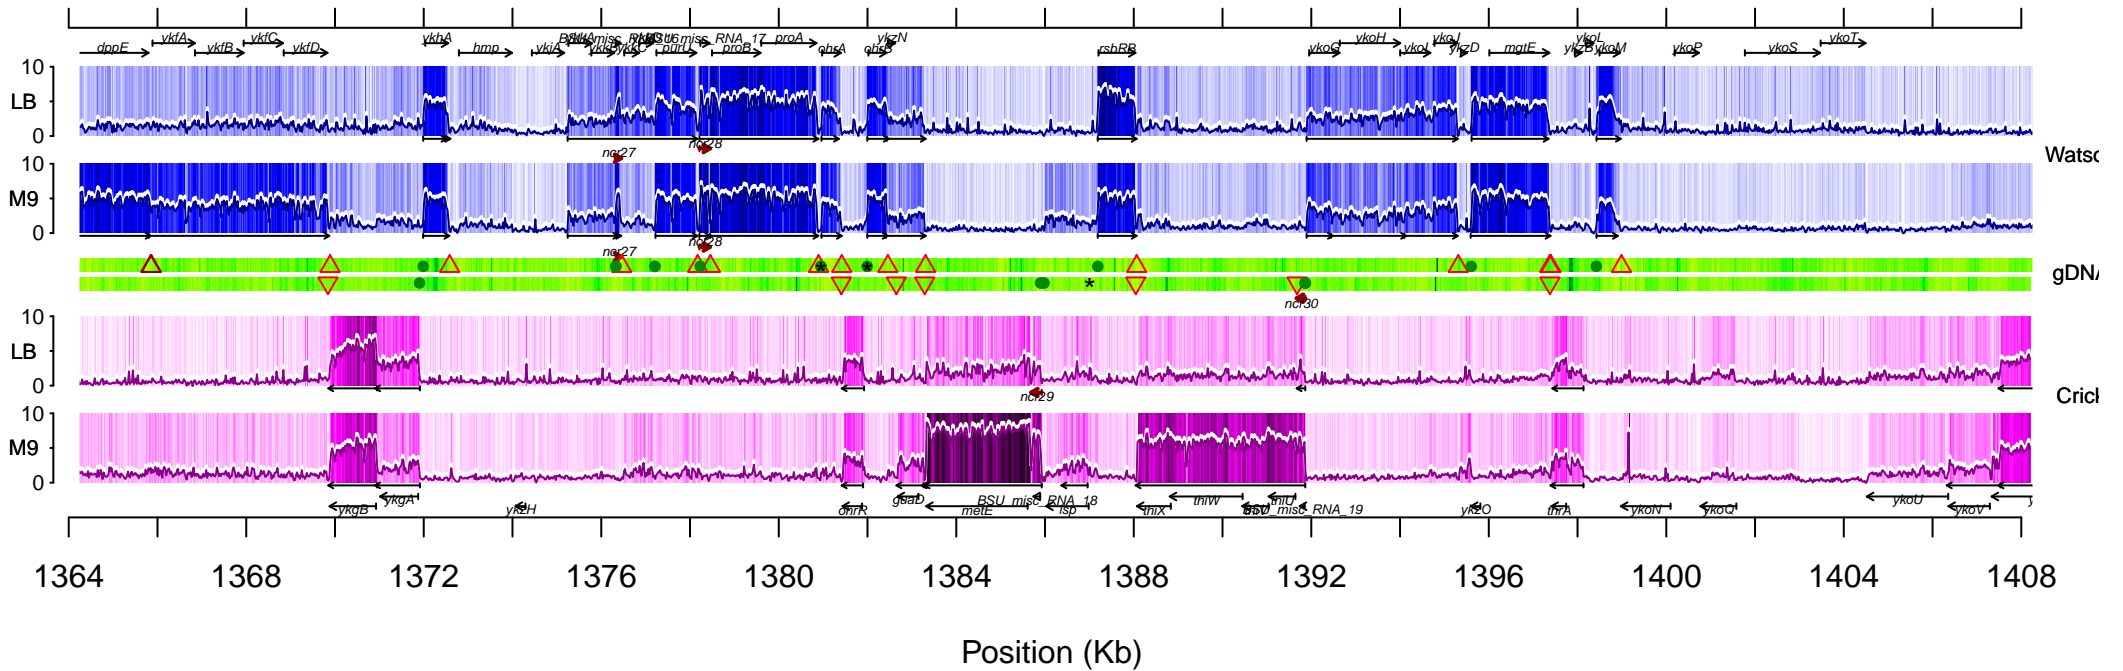

### 1408 – 1452 Kb

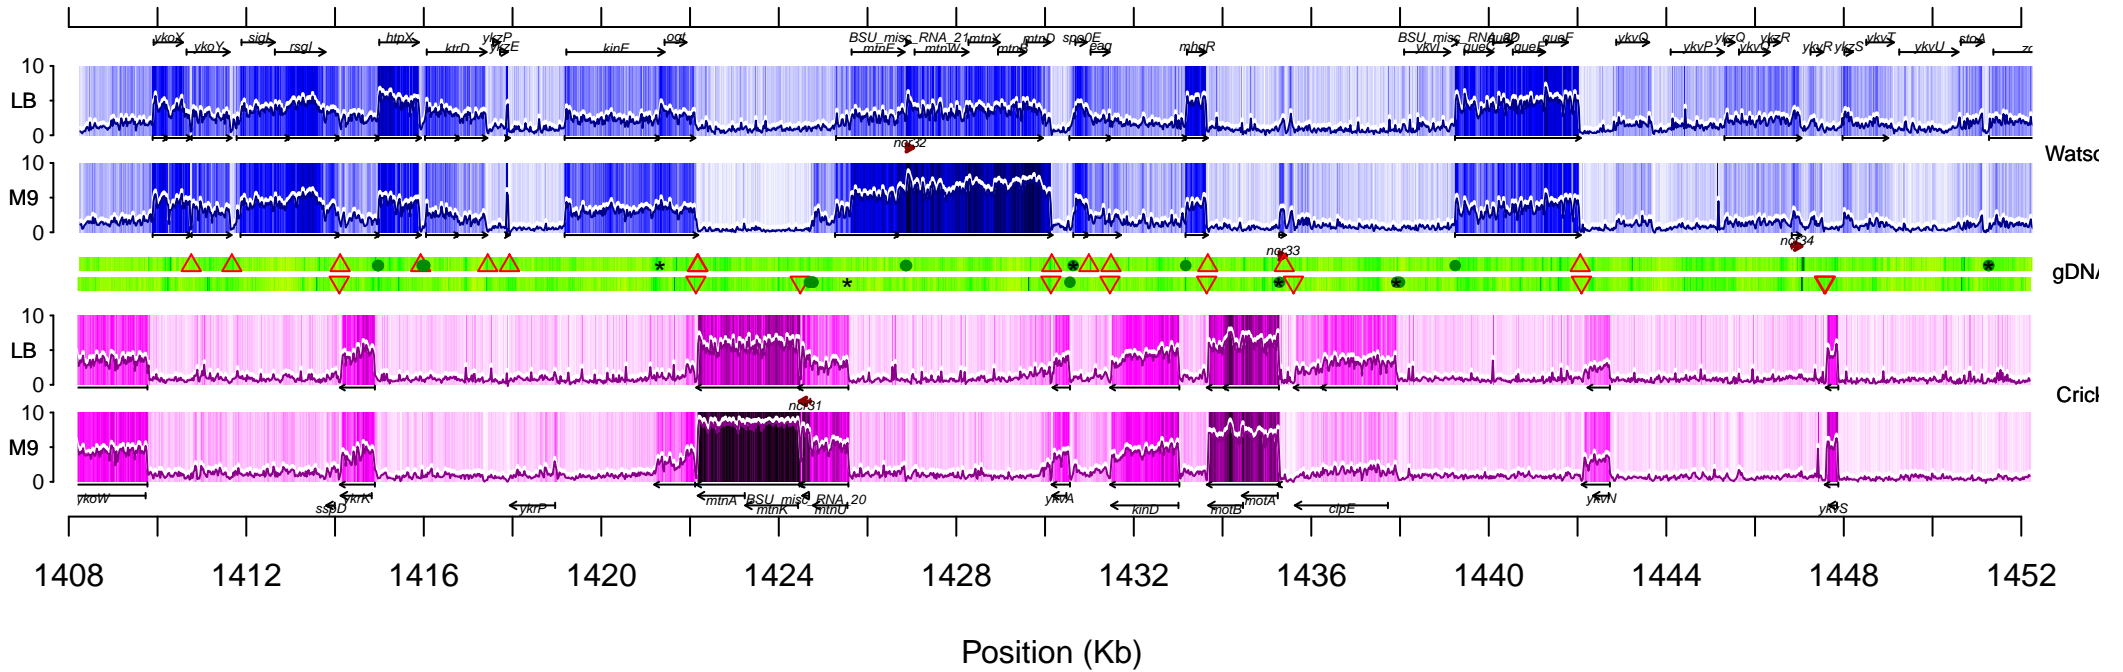

### 1452 – 1496 Kb

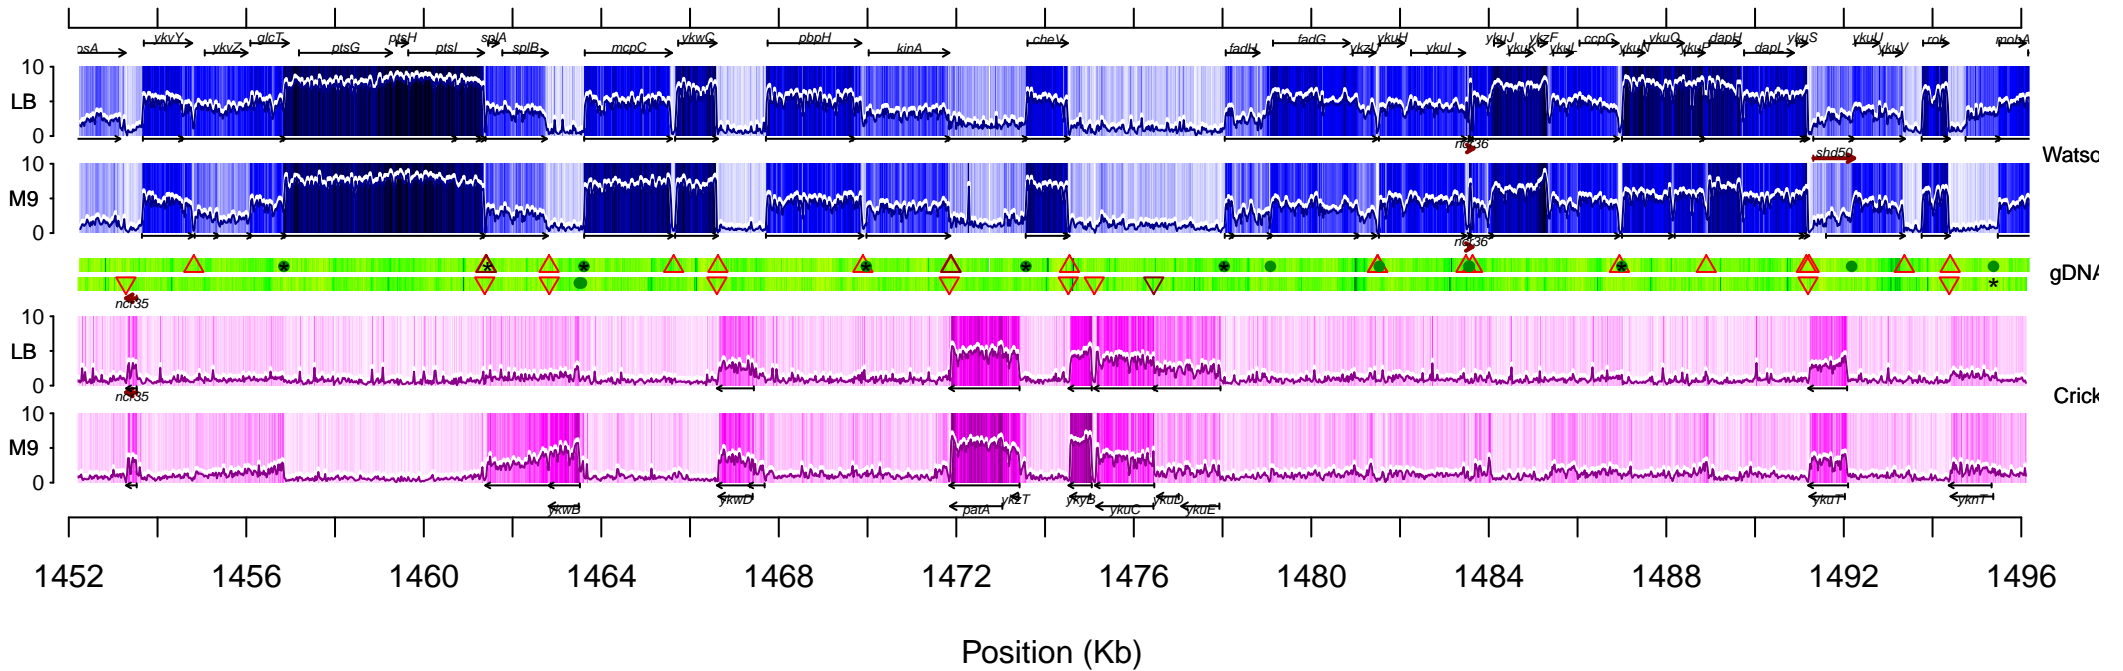

### 1496 – 1540 Kb

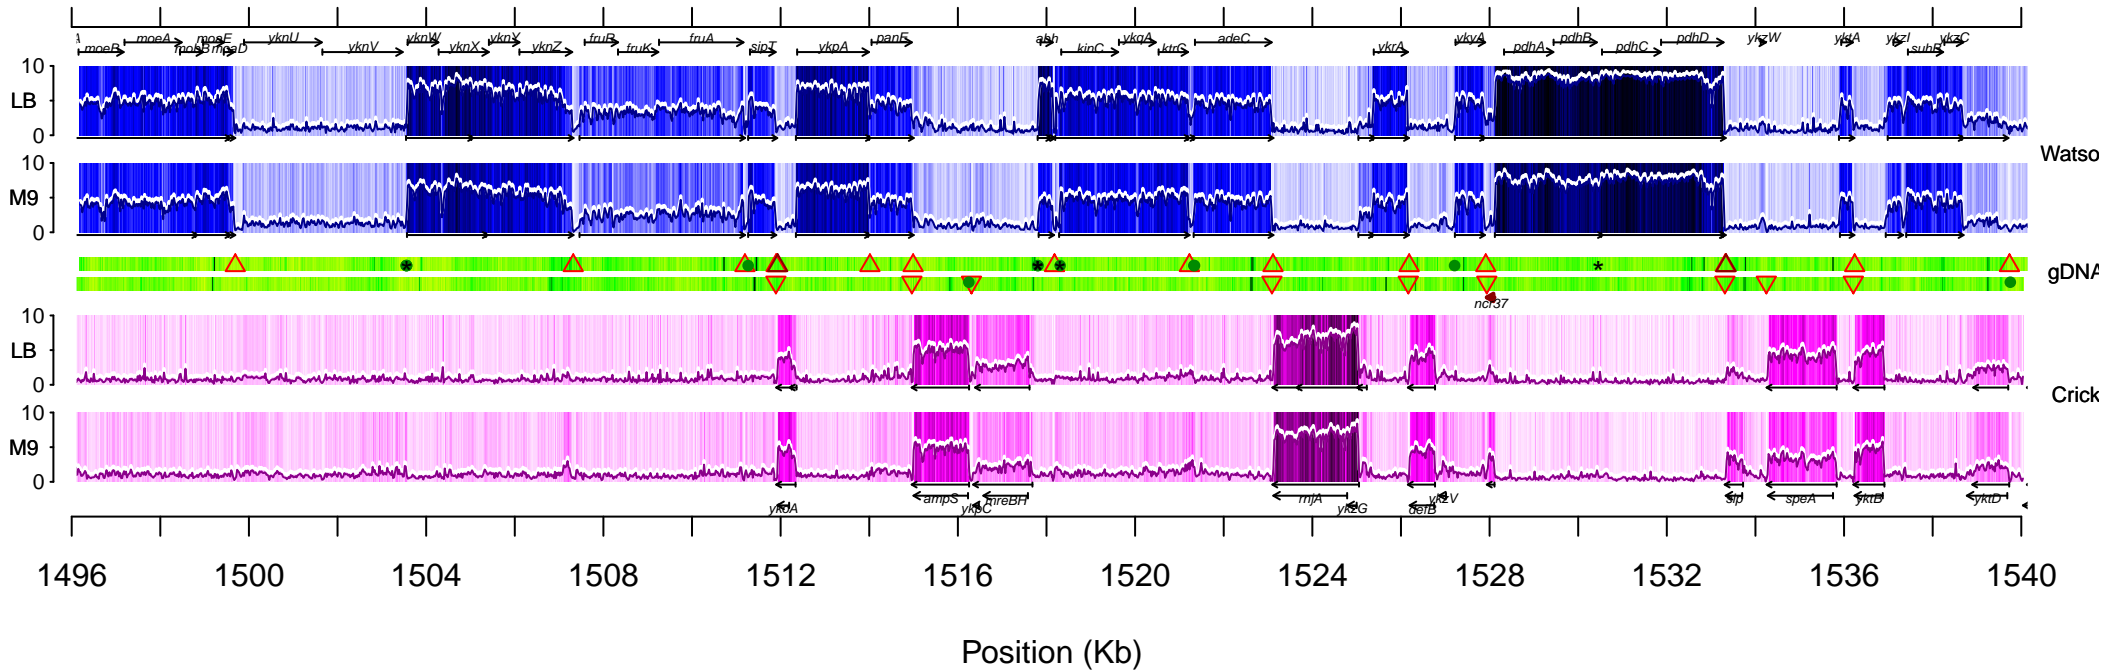

### 1540 – 1584 Kb

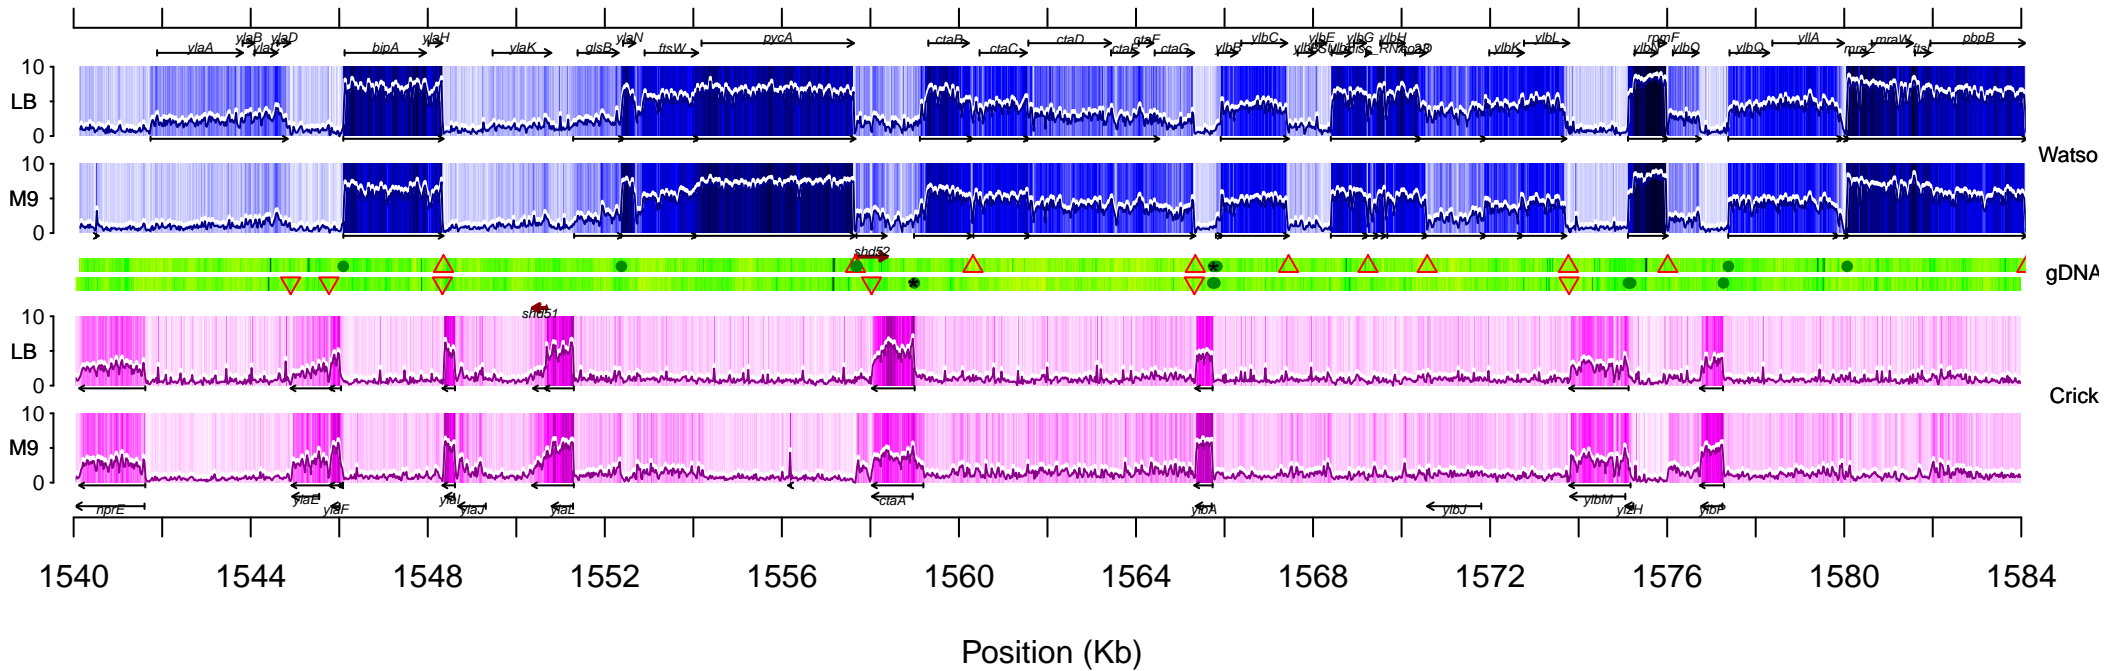

### 1584 – 1628 Kb

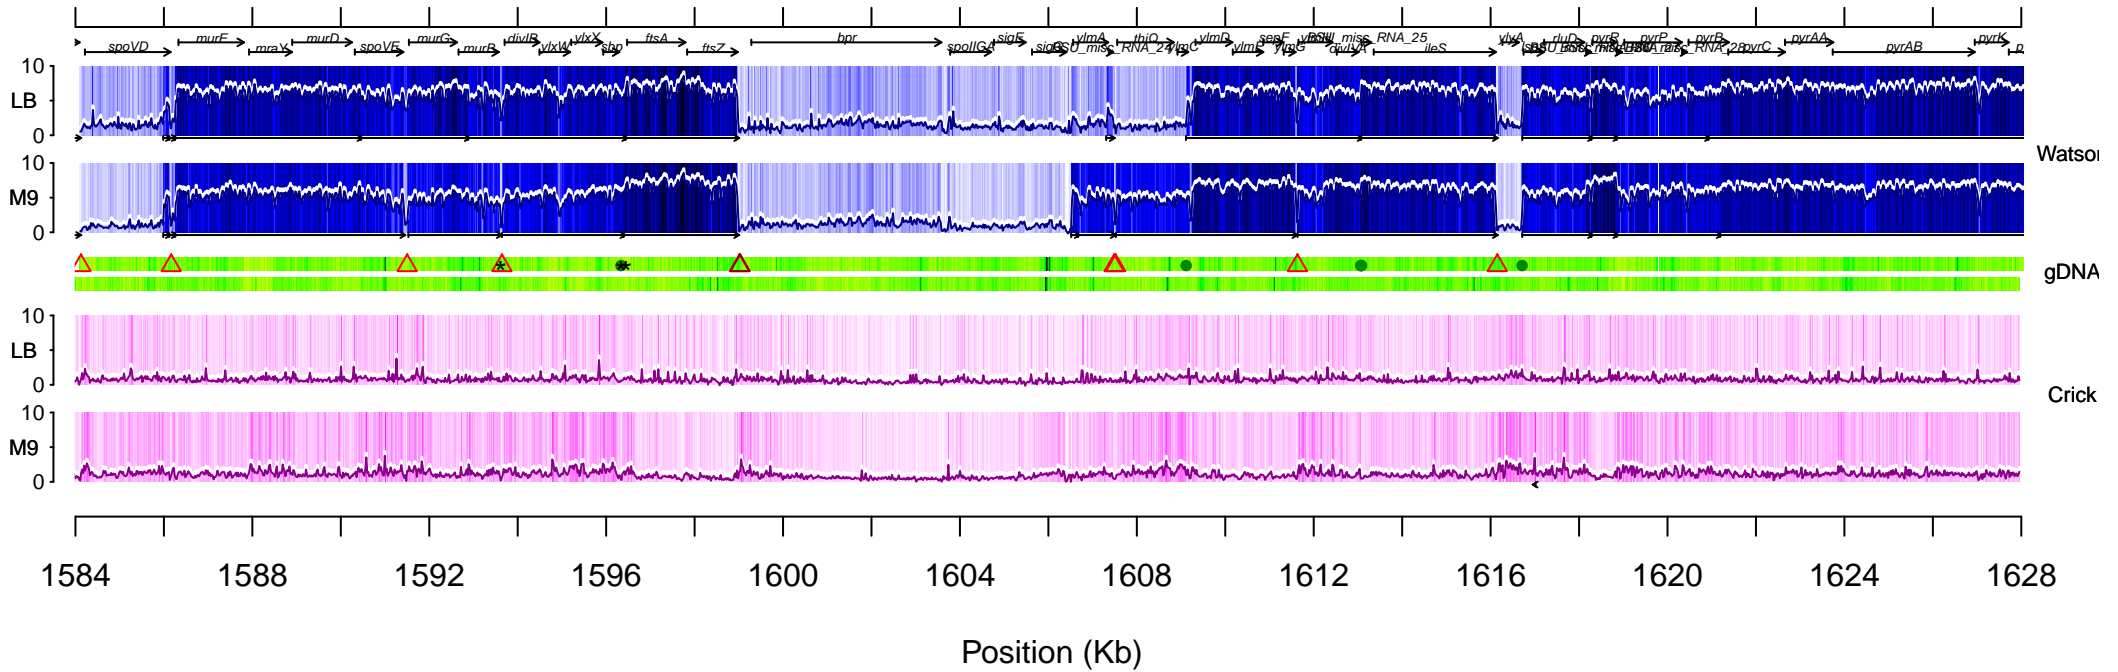

### 1628 – 1672 Kb

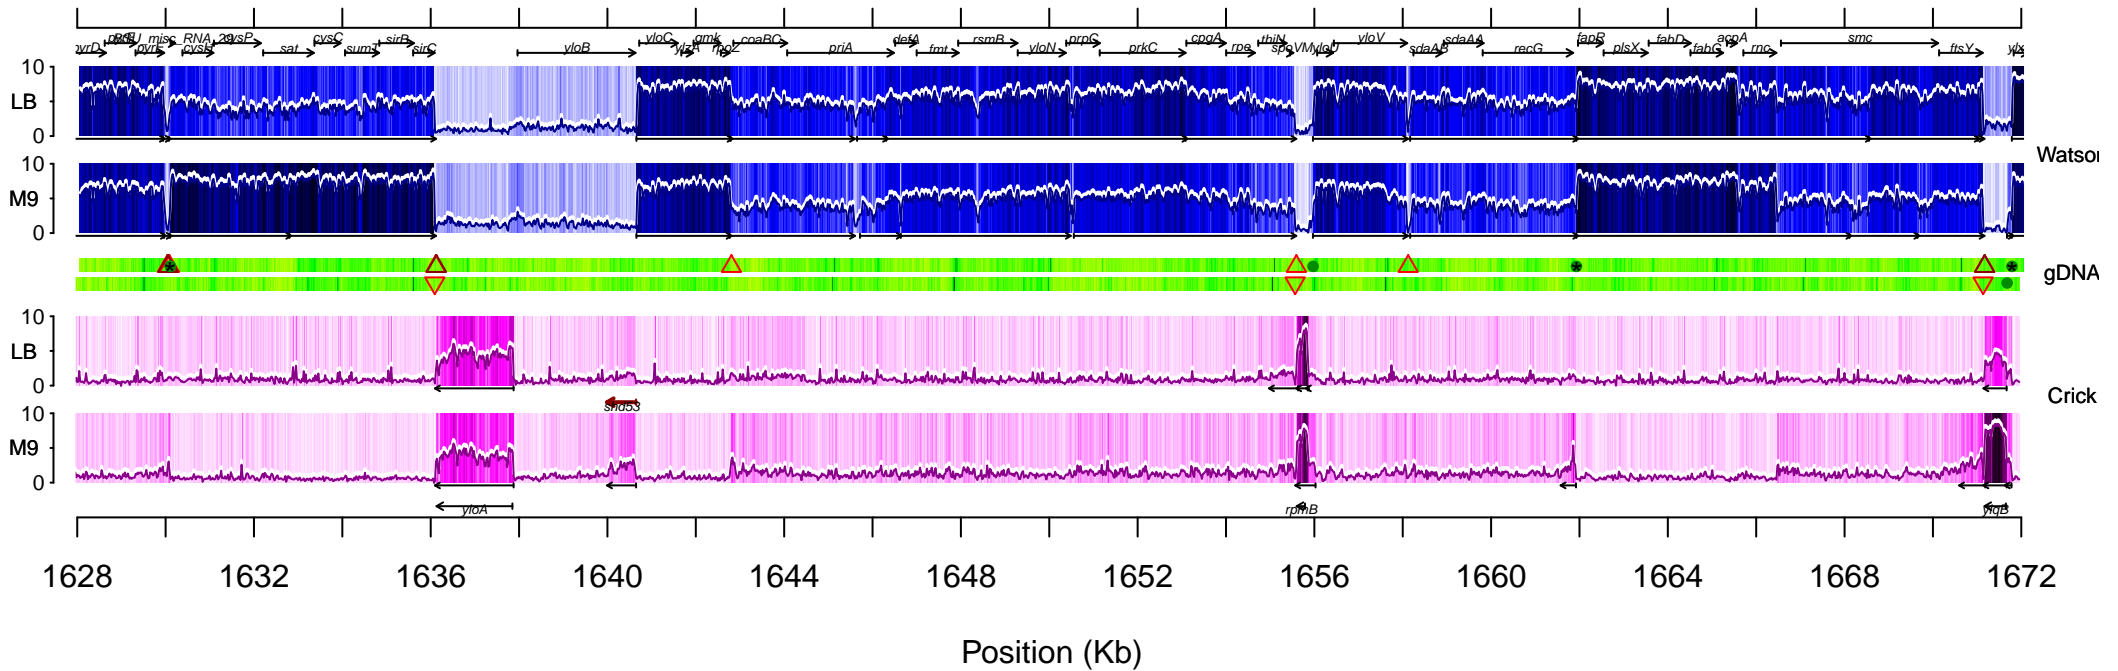

### 1672 – 1716 Kb

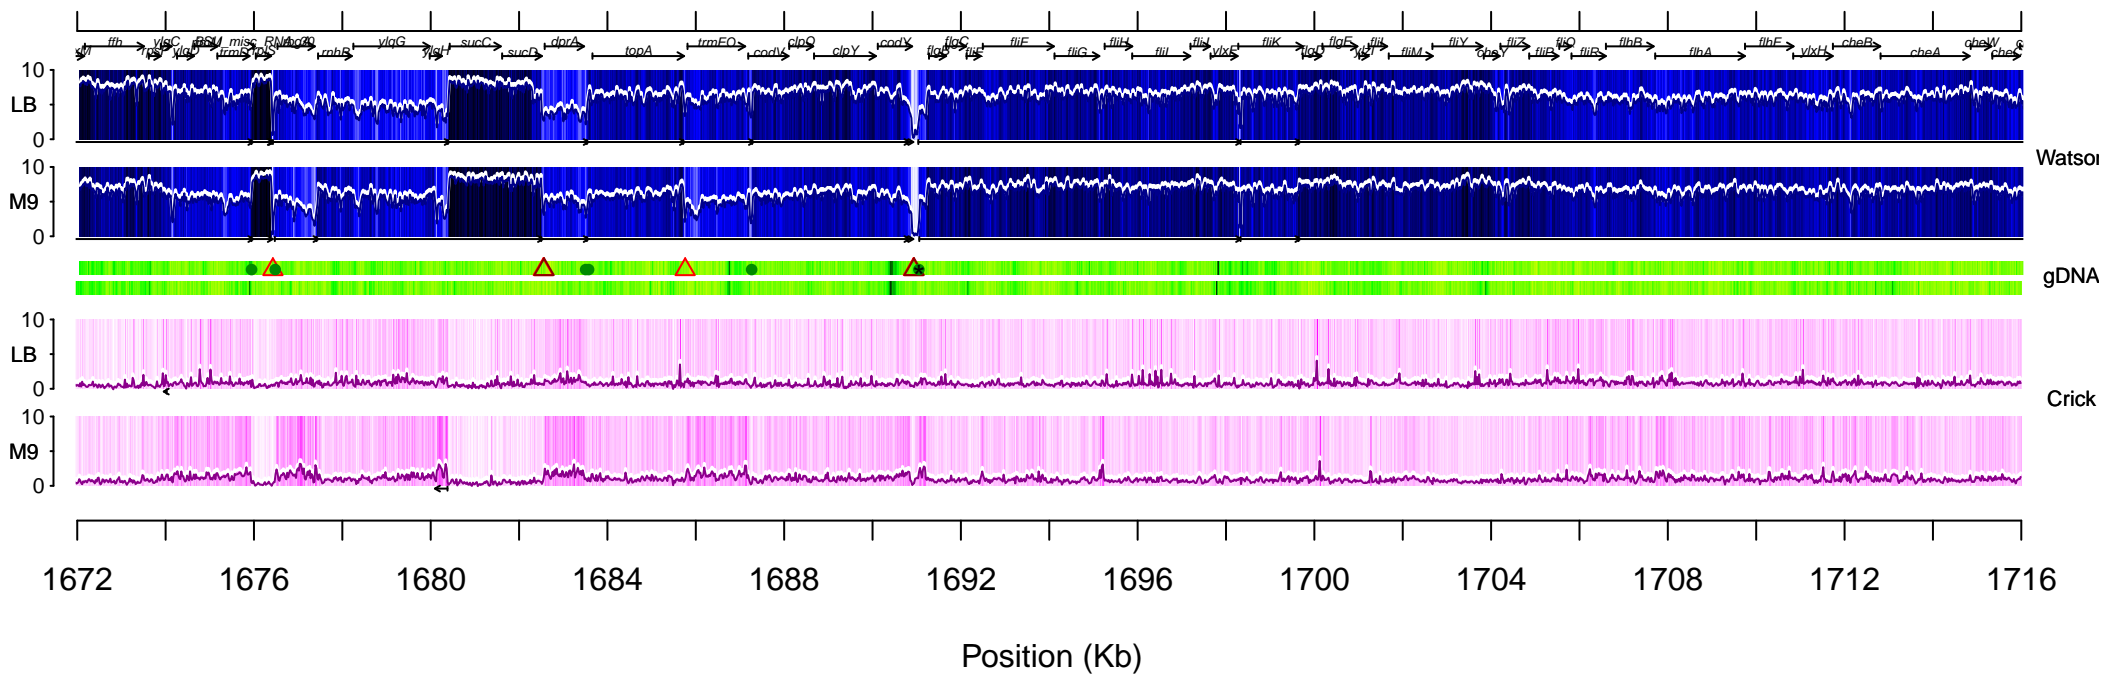

### 1716 – 1760 Kb

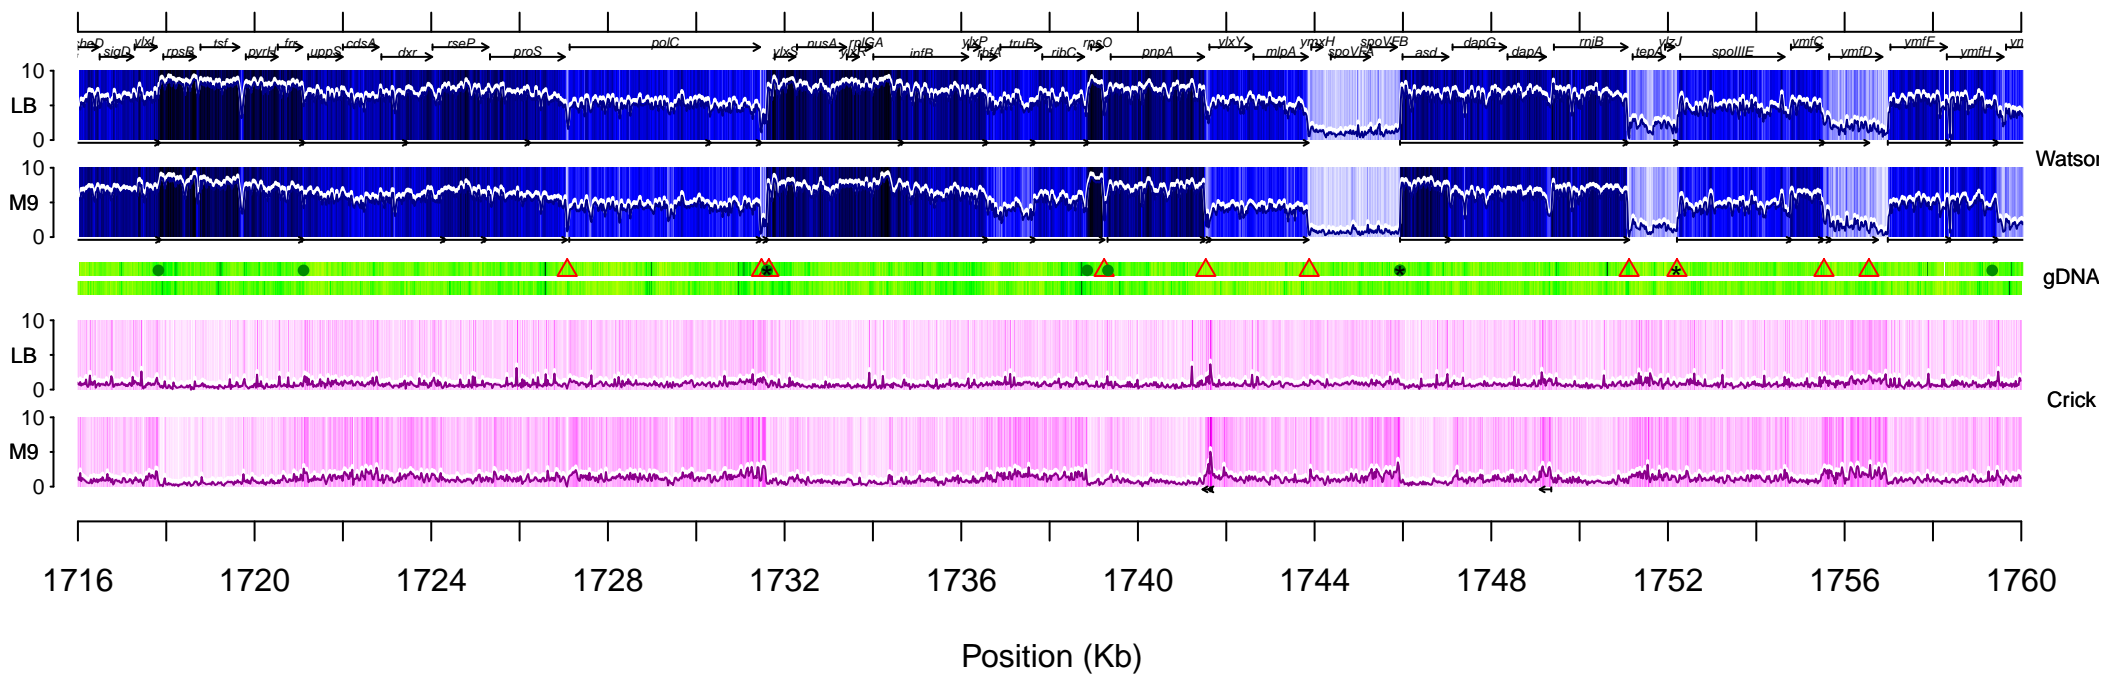

### 1760 – 1804 Kb

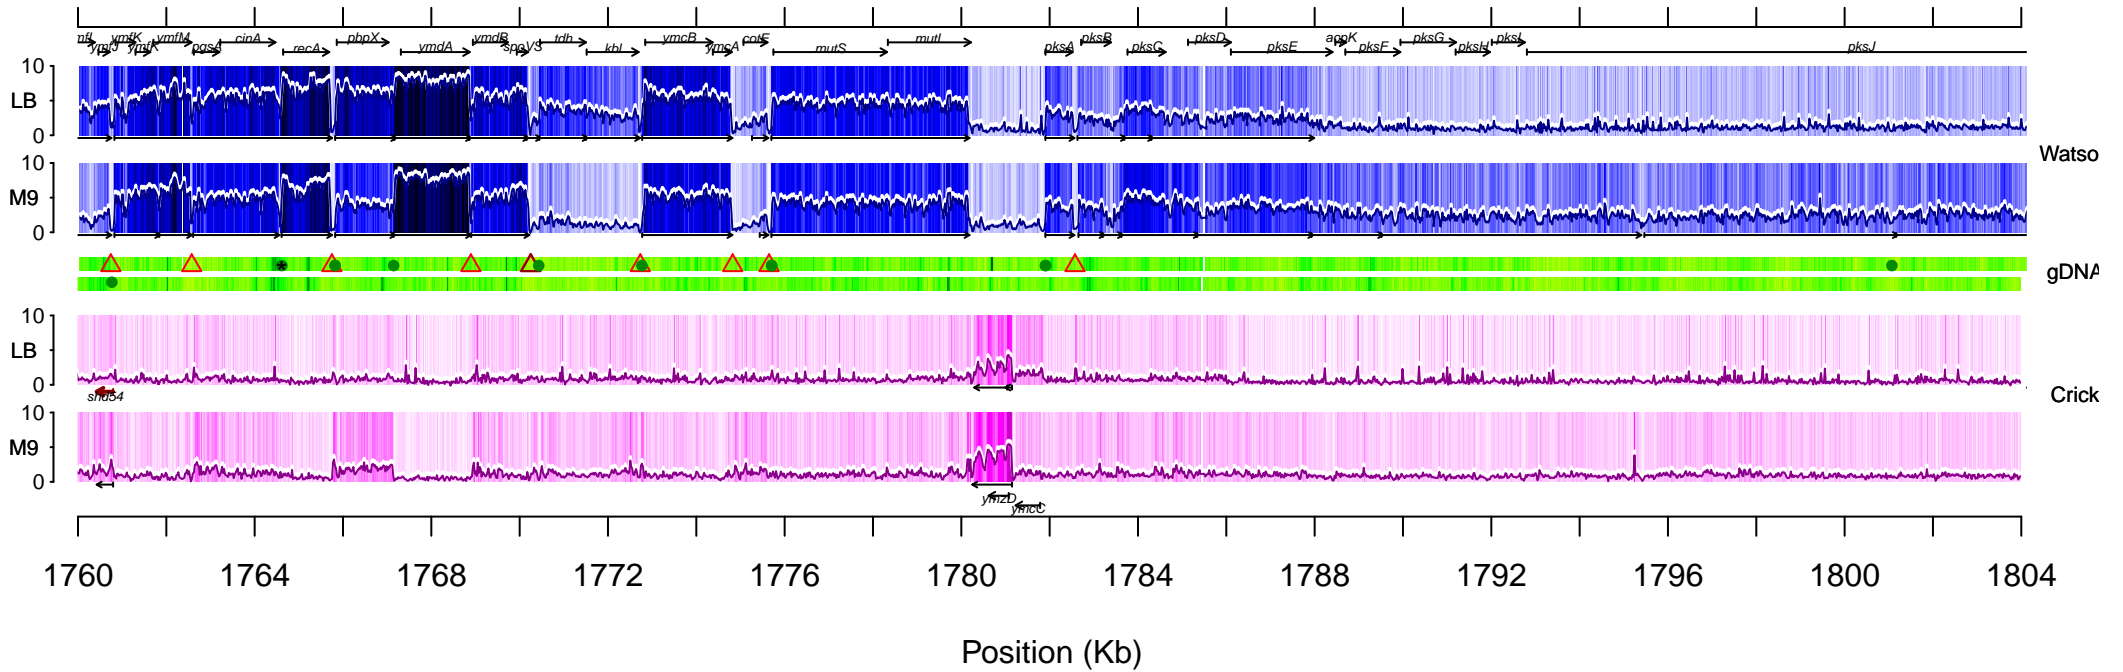

### 1804 – 1848 Kb

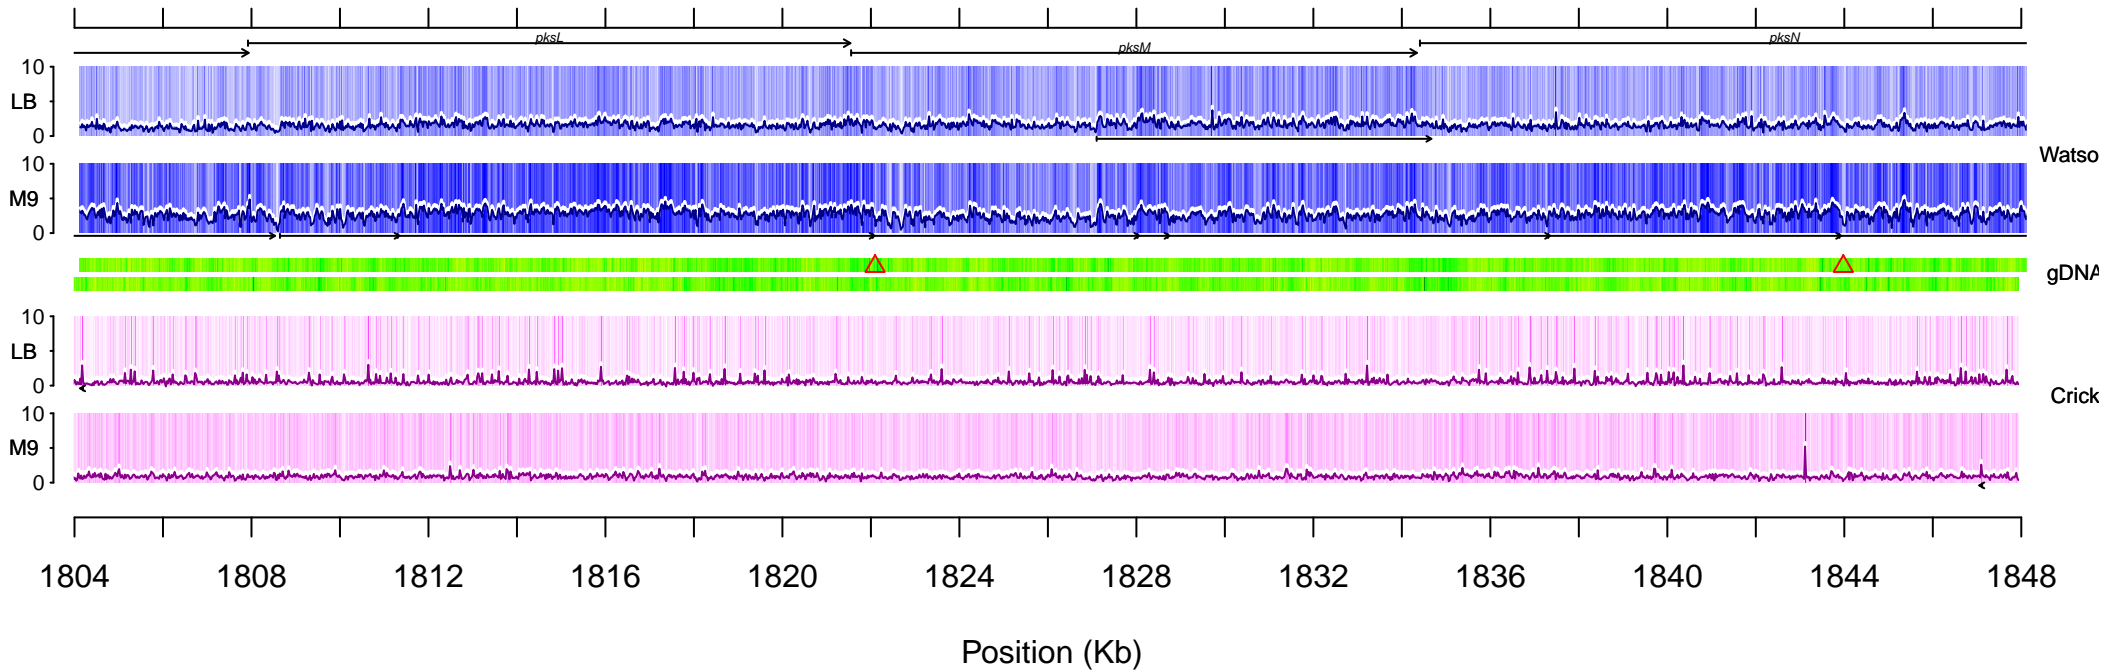

### 1848 – 1892 Kb

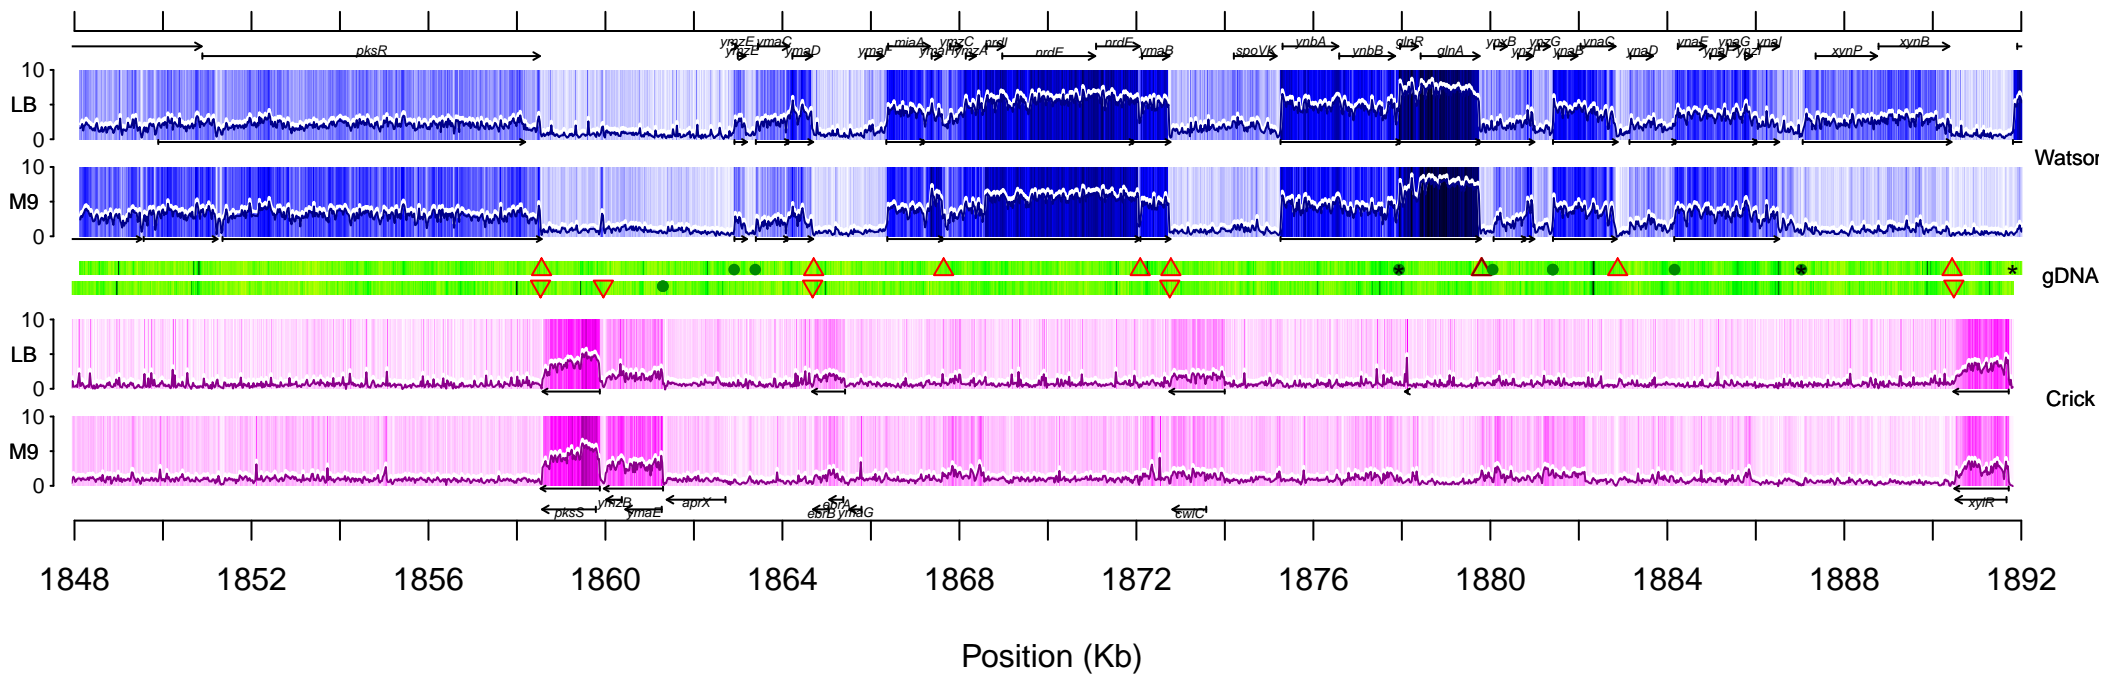

### 1892 – 1936 Kb

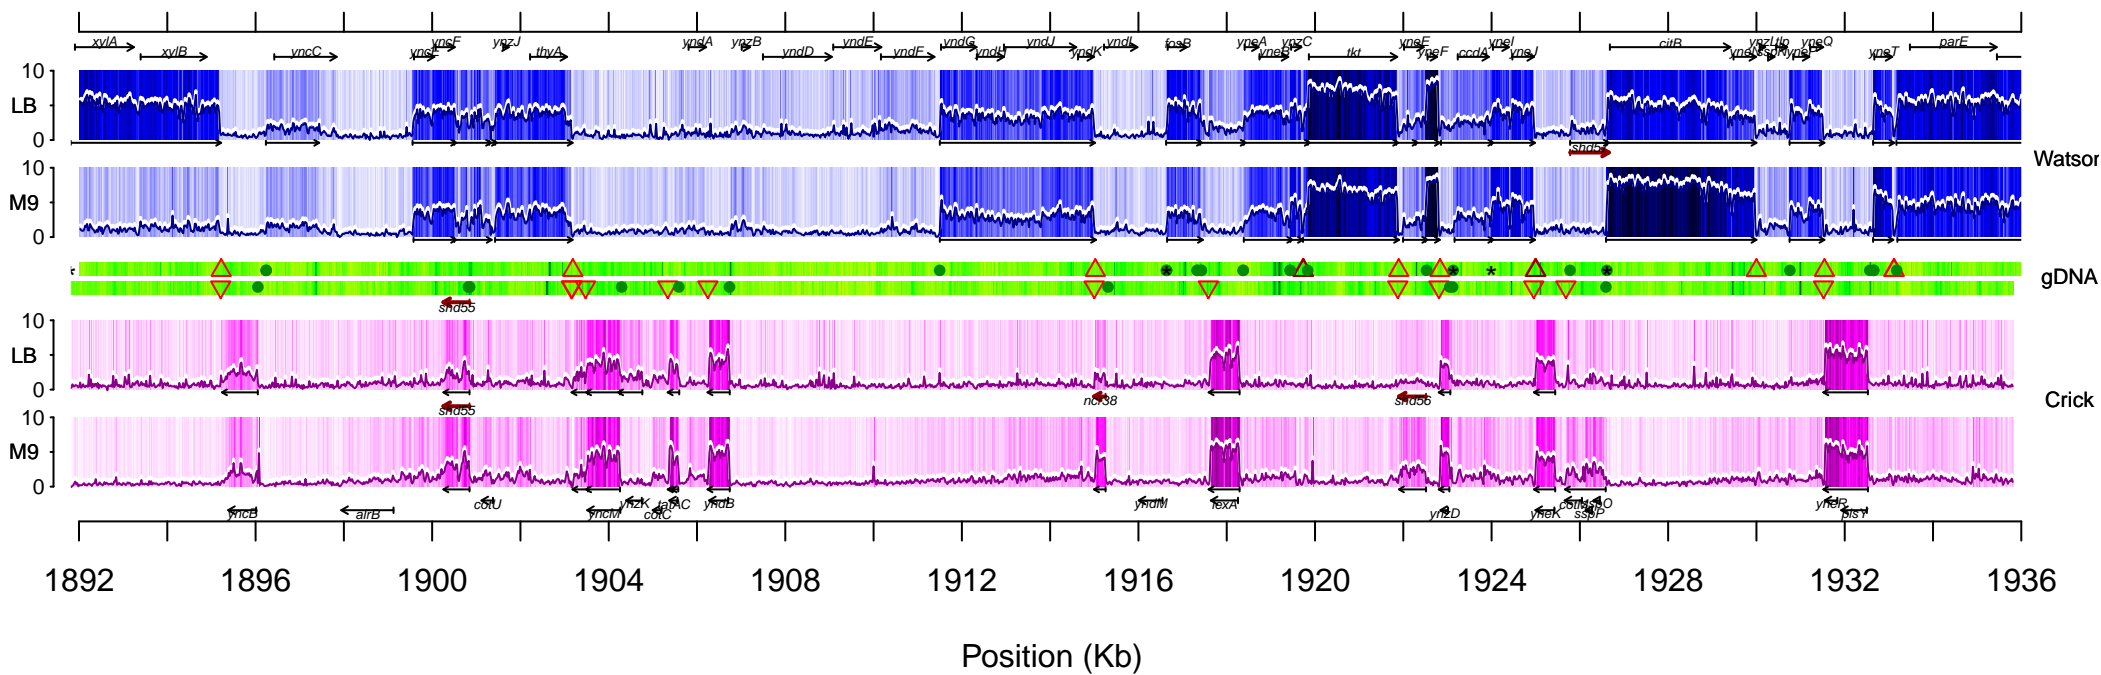

### 1936 – 1980 Kb

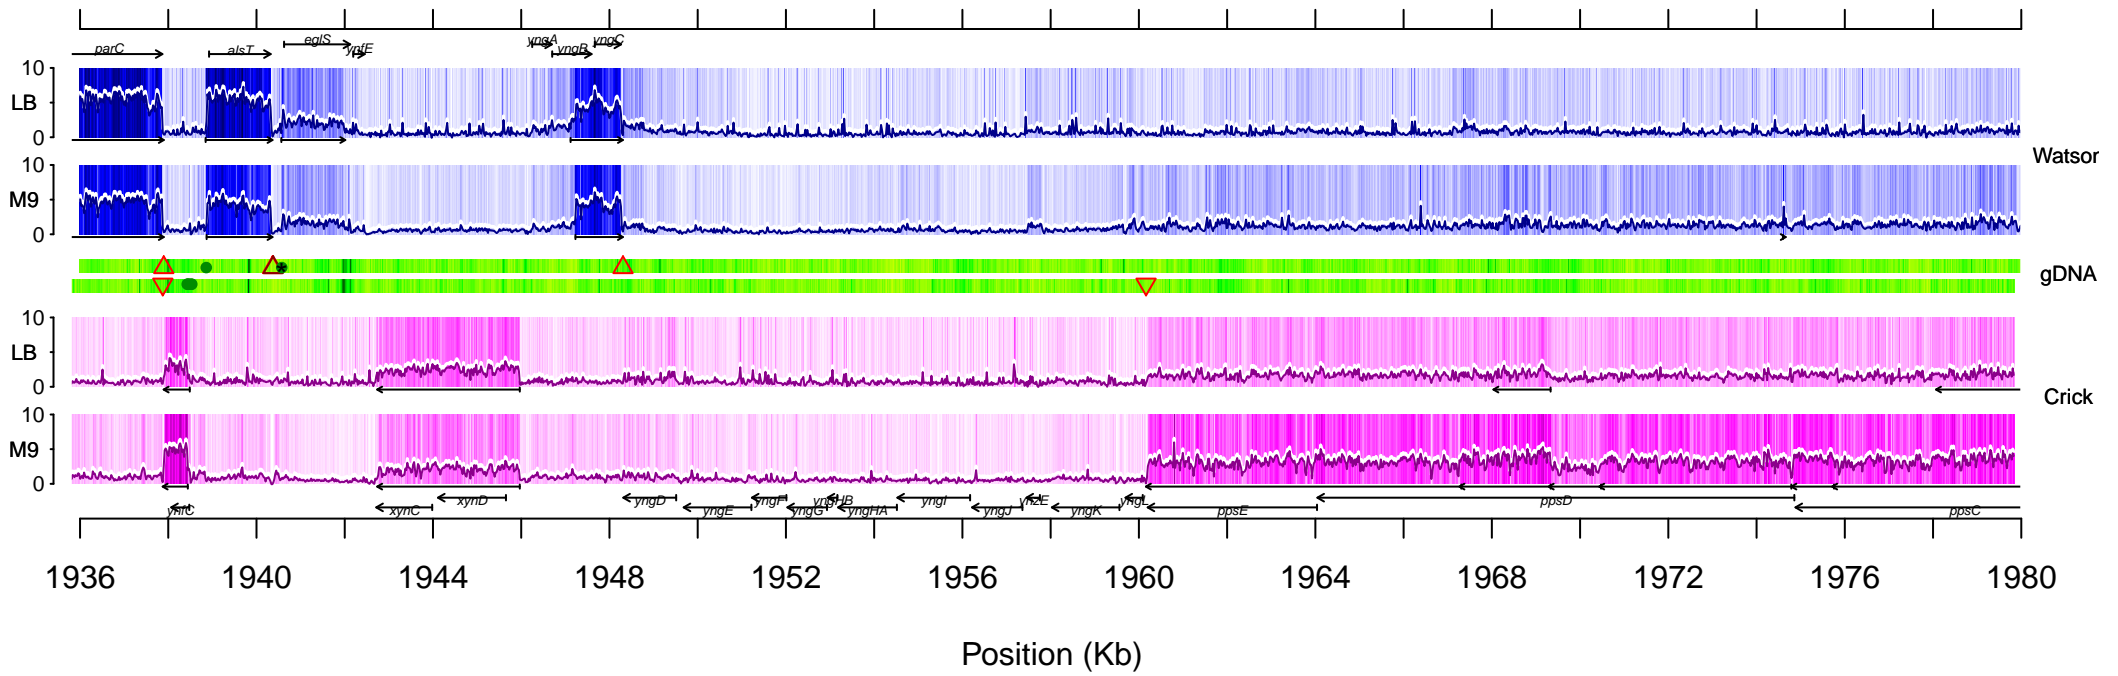

### 1980 – 2024 Kb

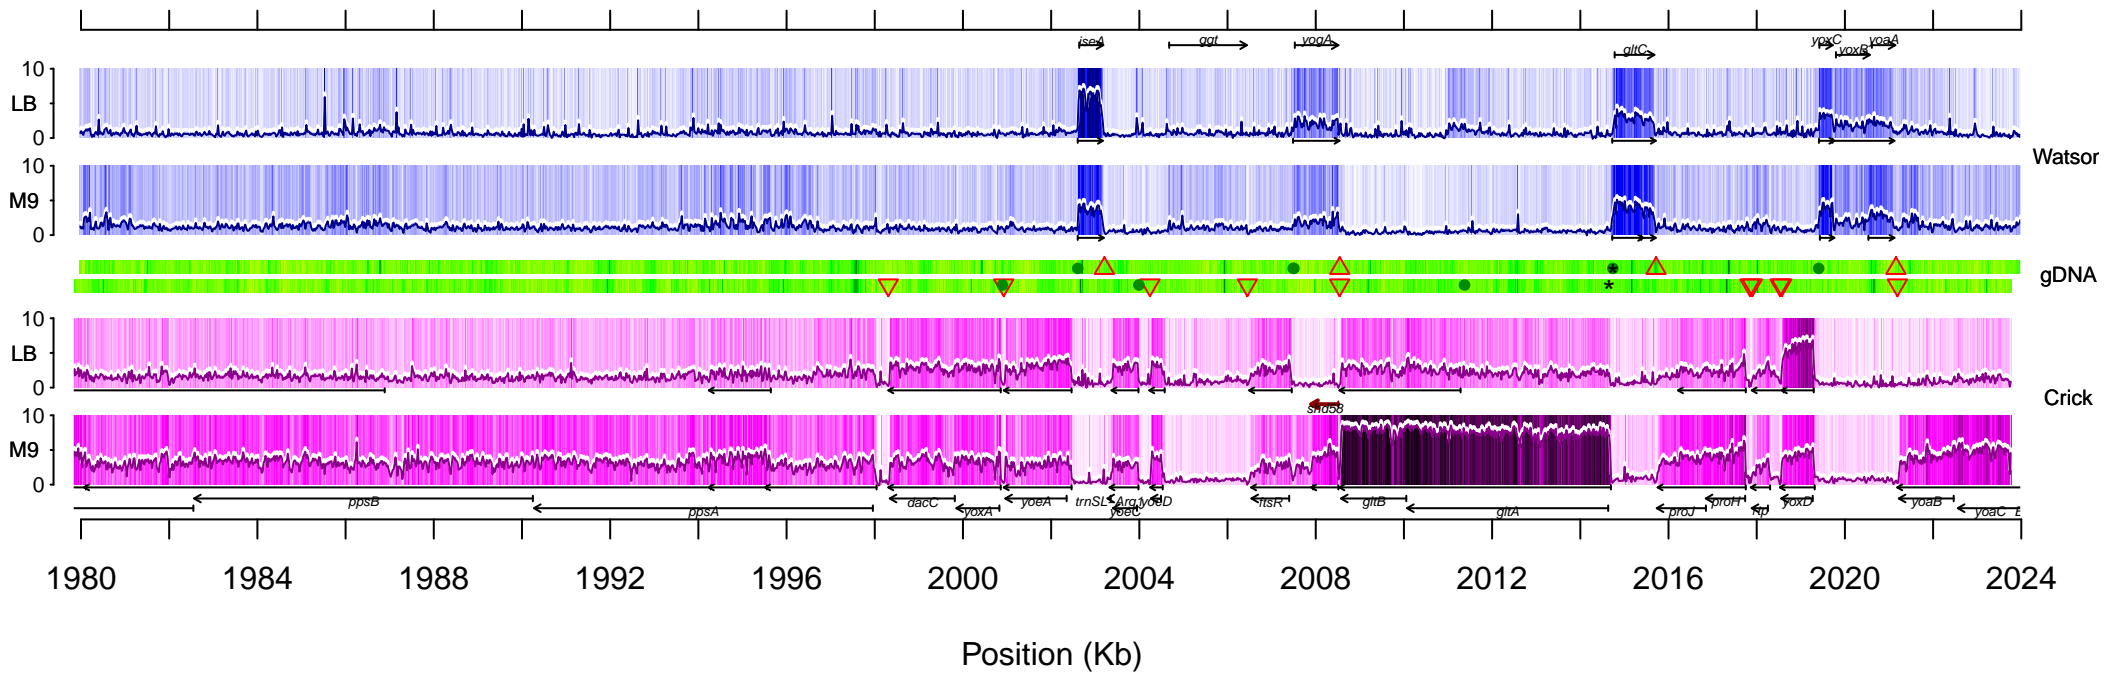





## 2112 – 2156 Kb

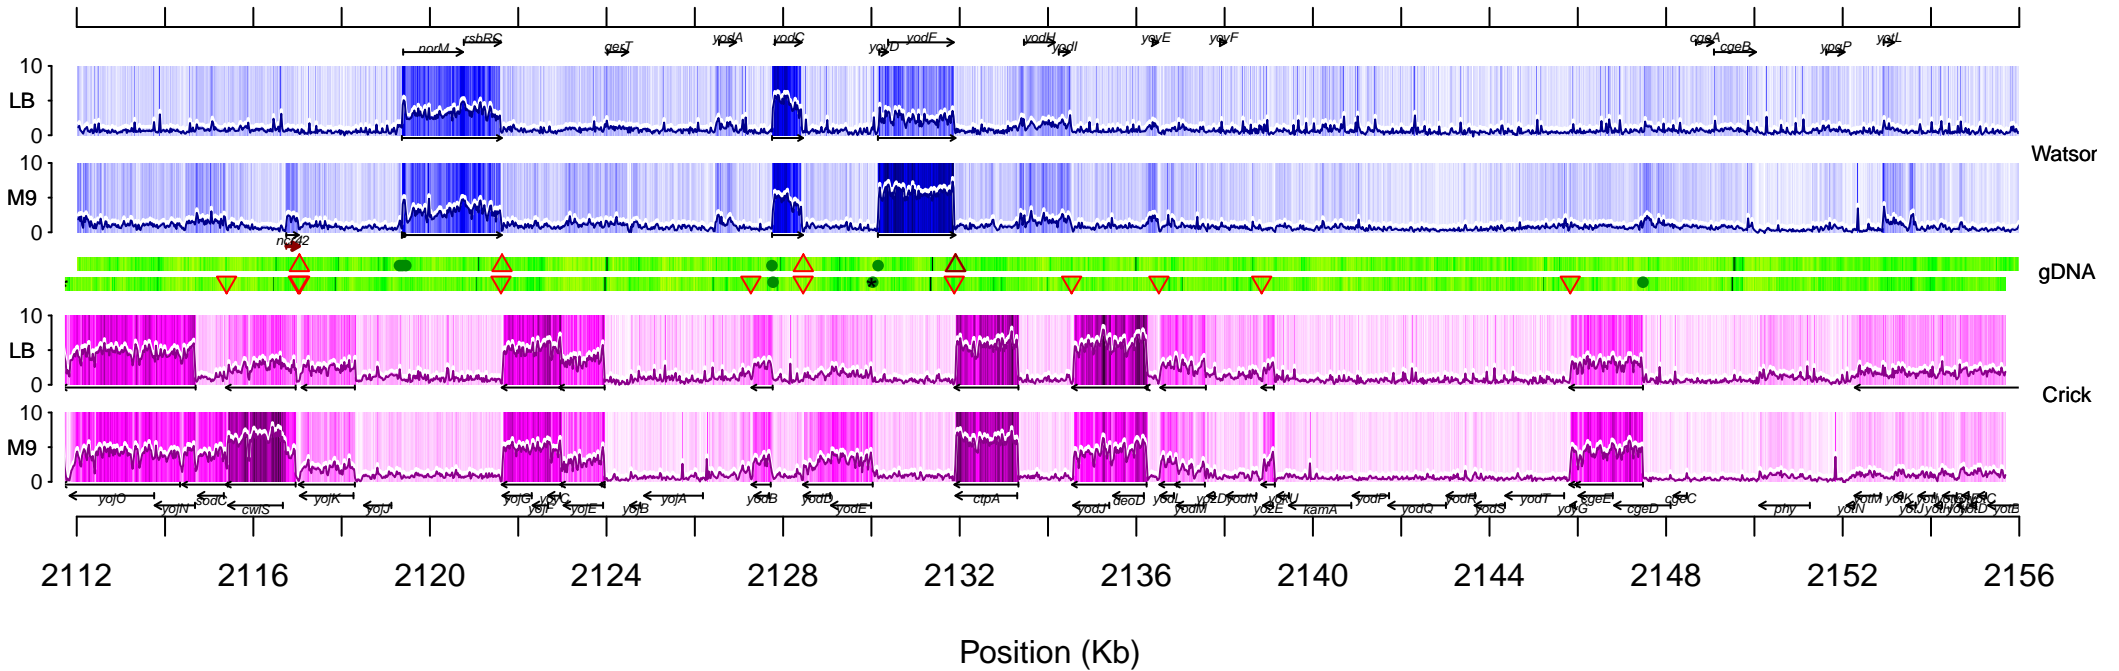

## 2156 – 2200 Kb

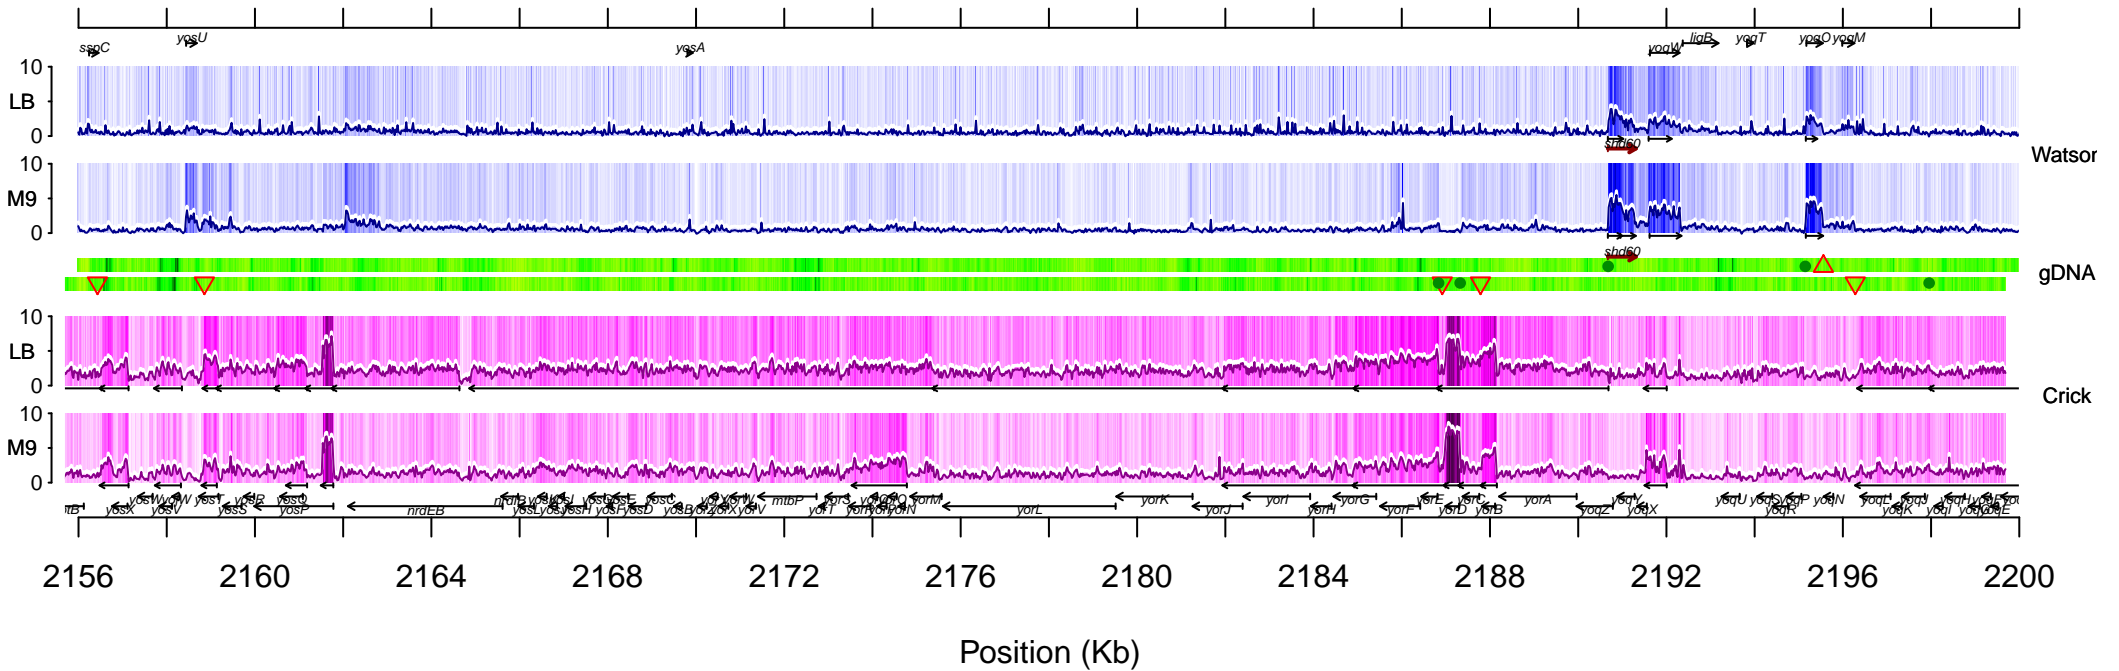

## 2200 – 2244 Kb

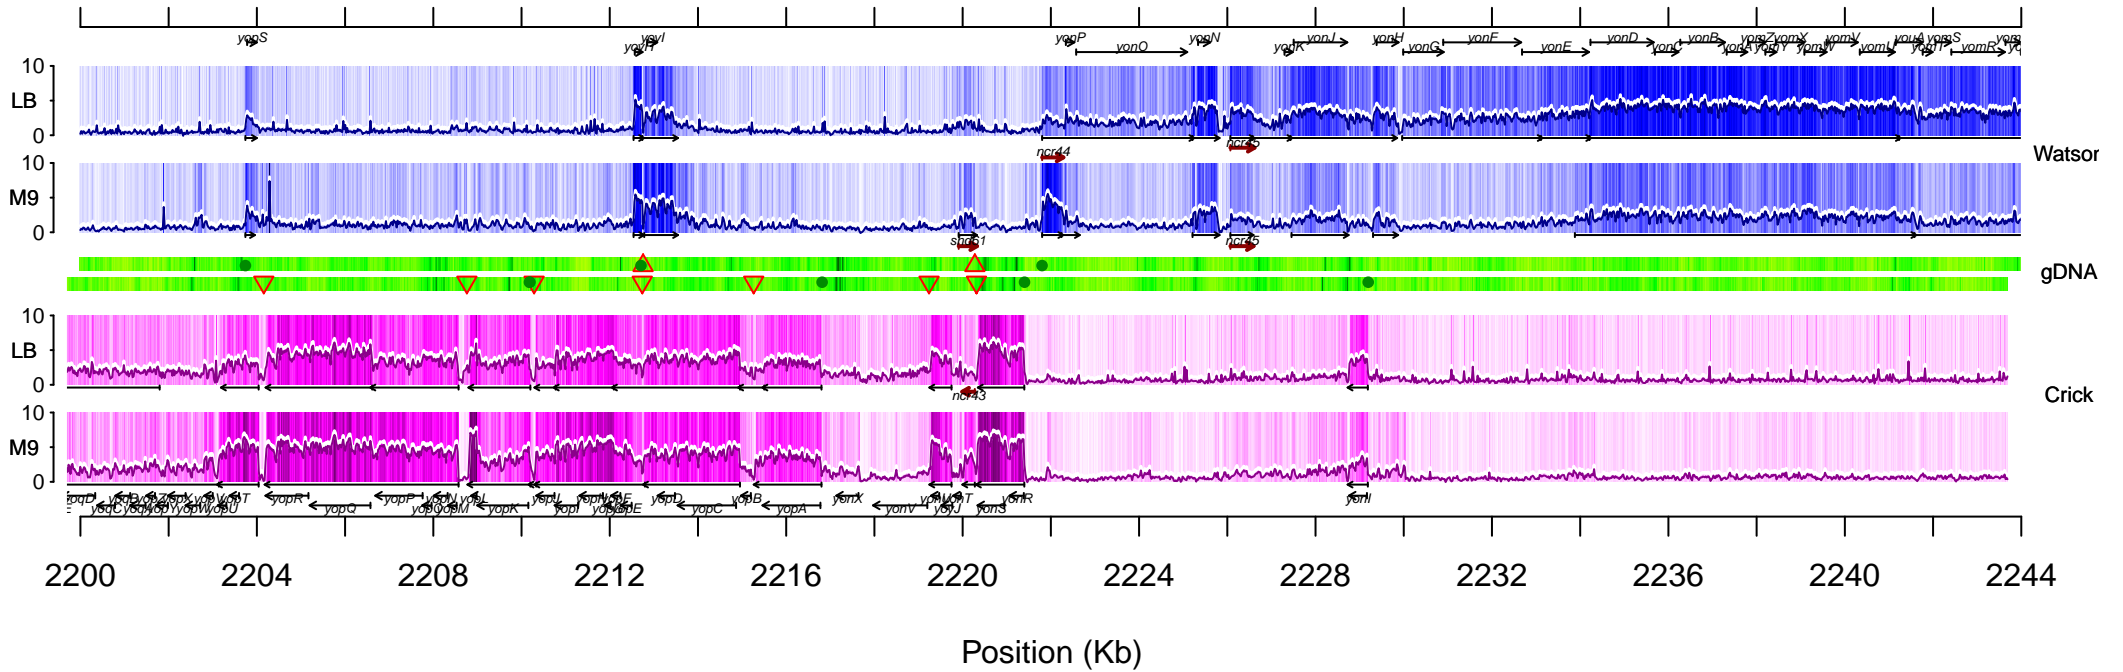

## 2244 – 2288 Kb

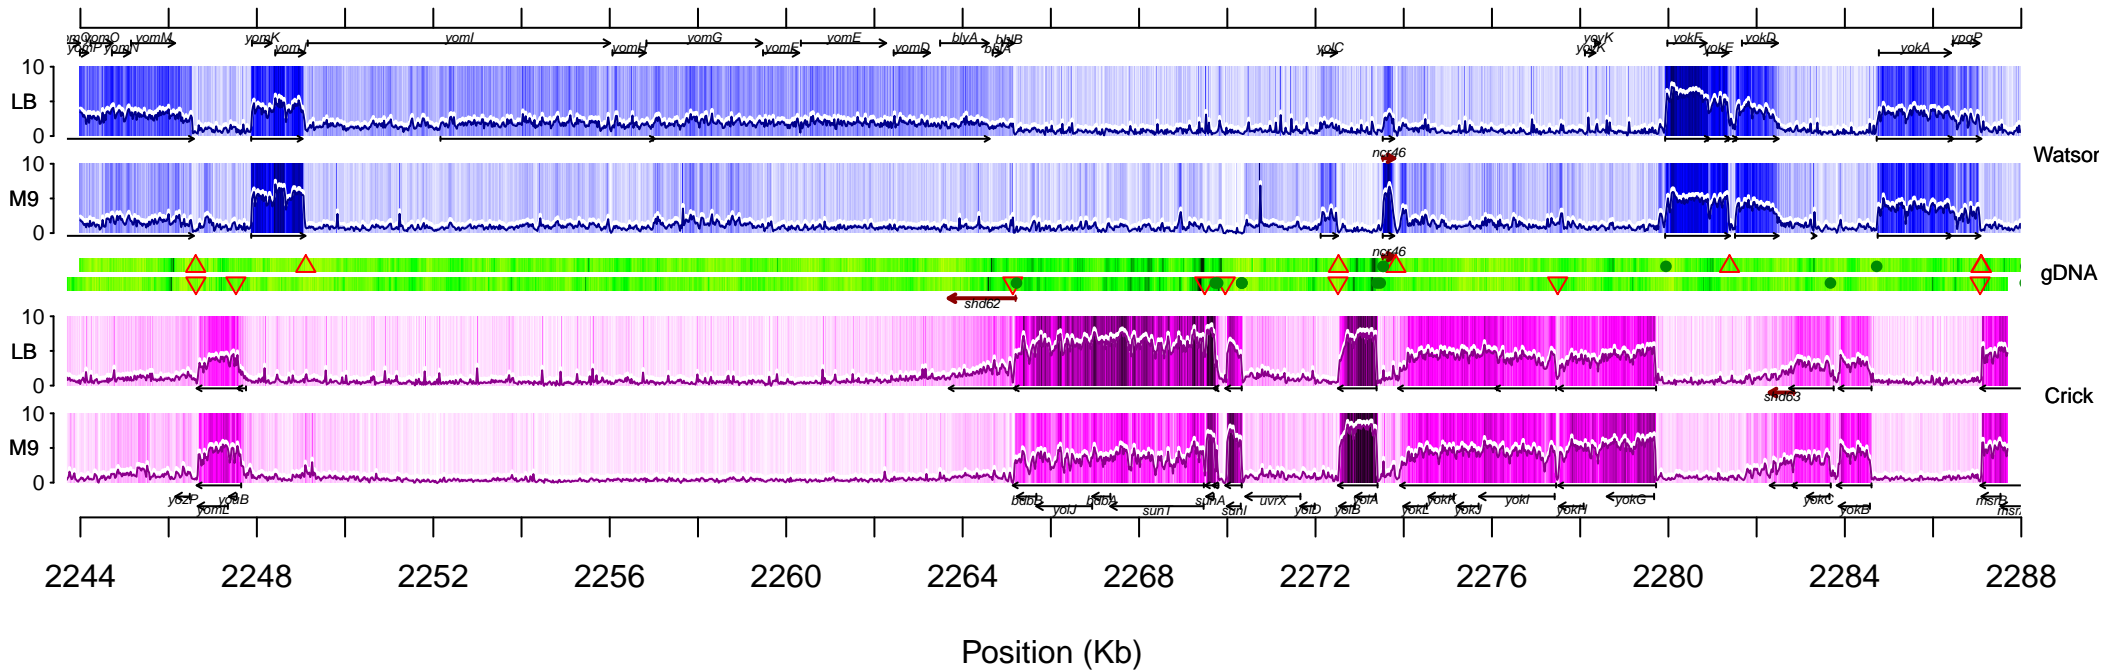

## 2288 – 2332 Kb

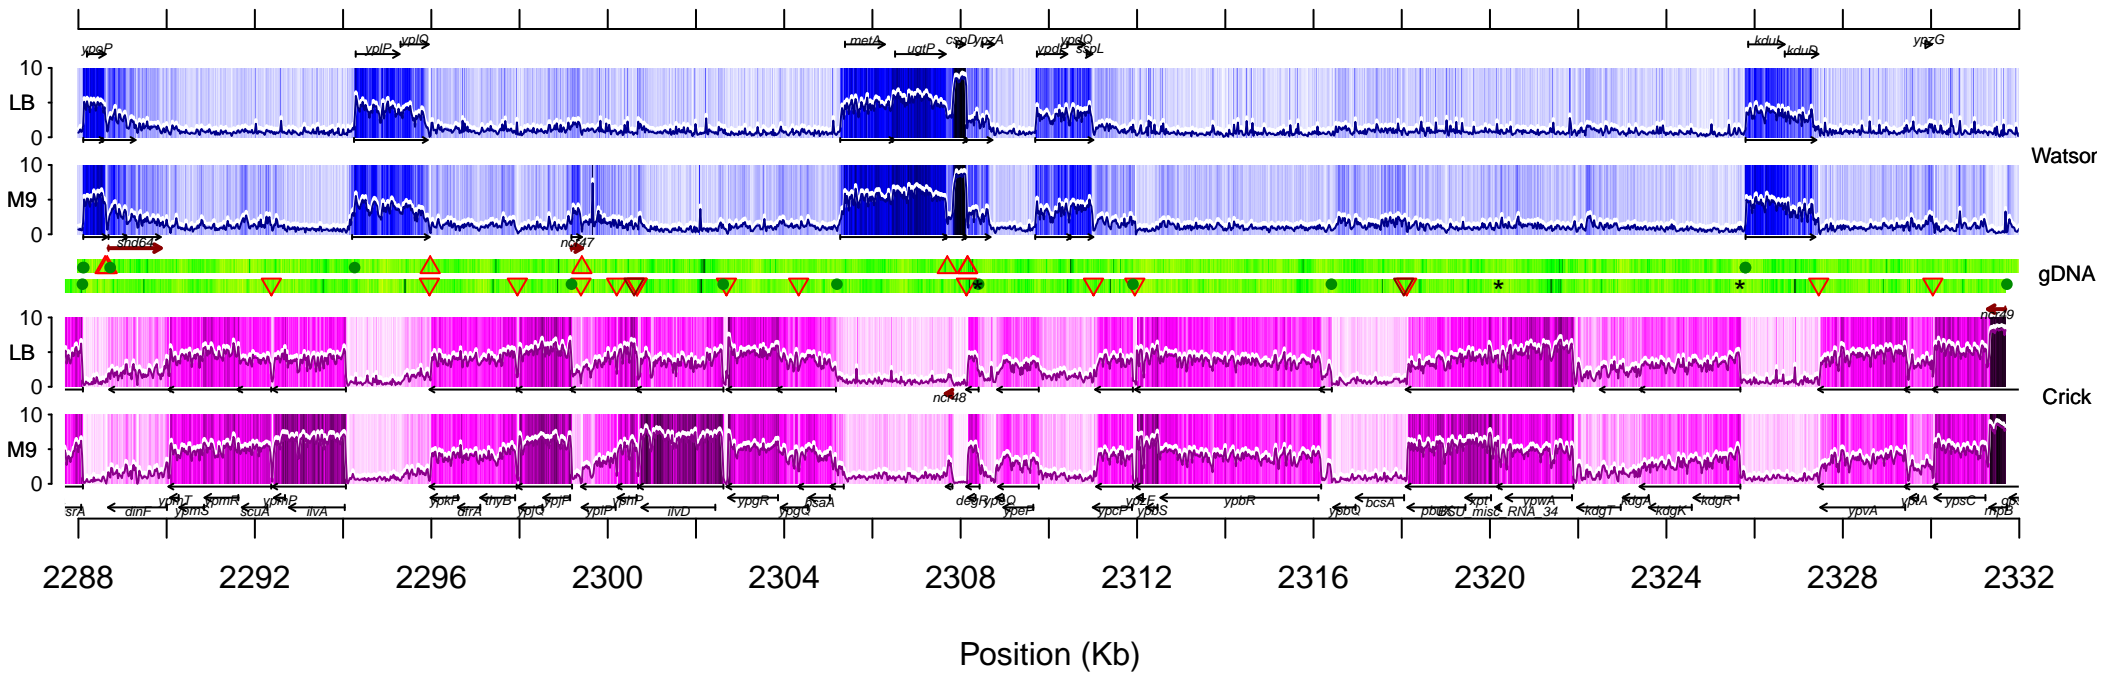

## 2332 – 2376 Kb

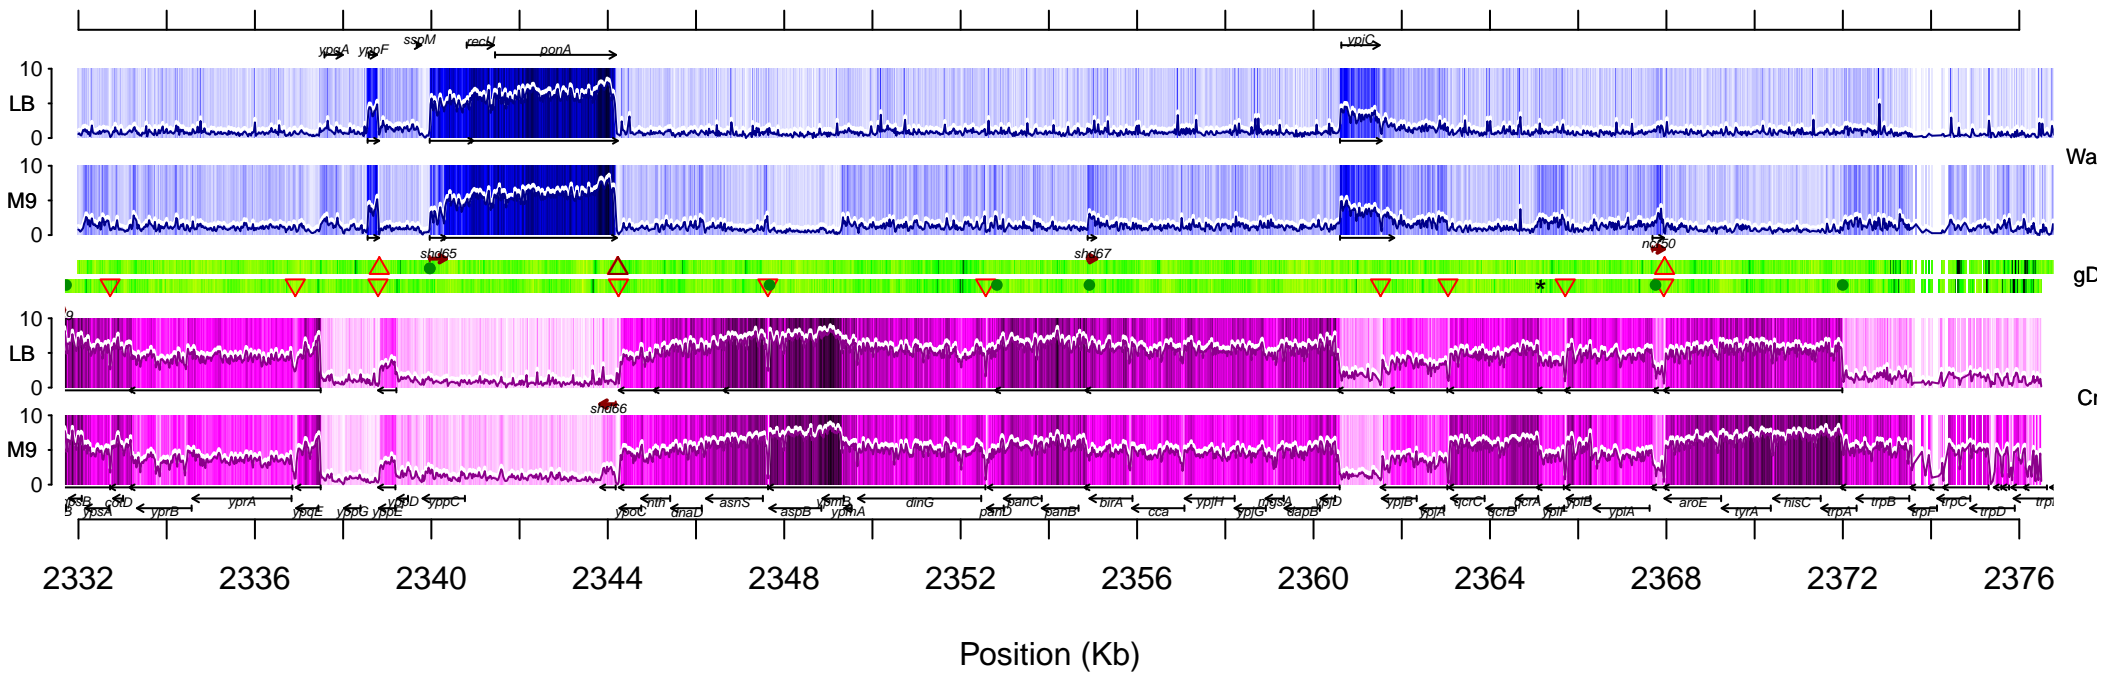

### 2377 – 2420 Kb

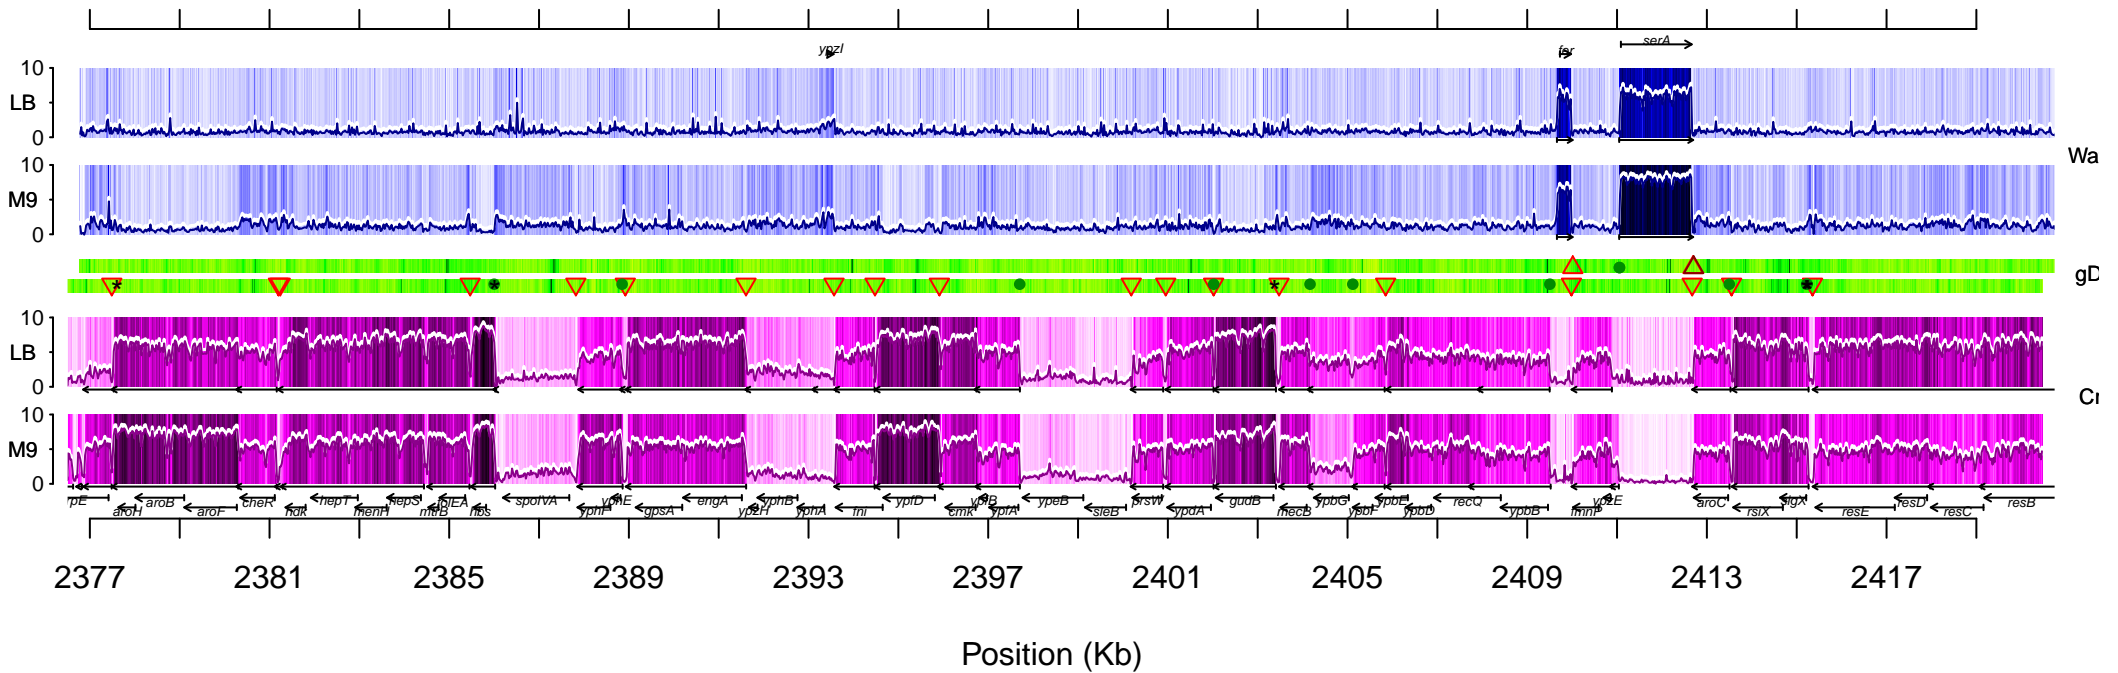

### 2421 – 2464 Kb

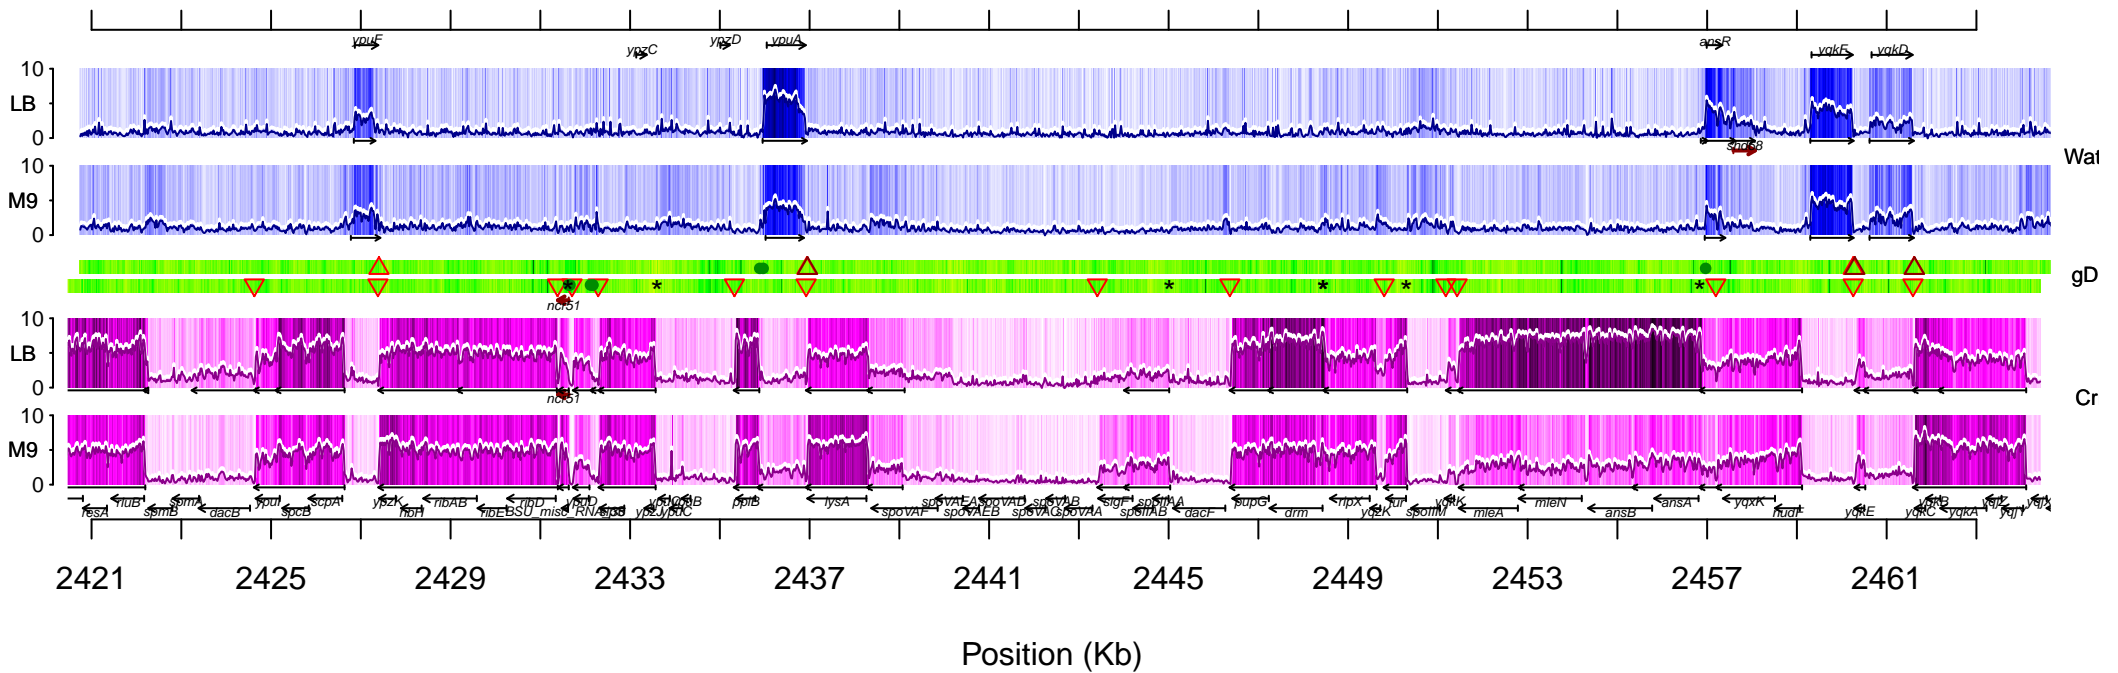

## 2465 – 2508 Kb

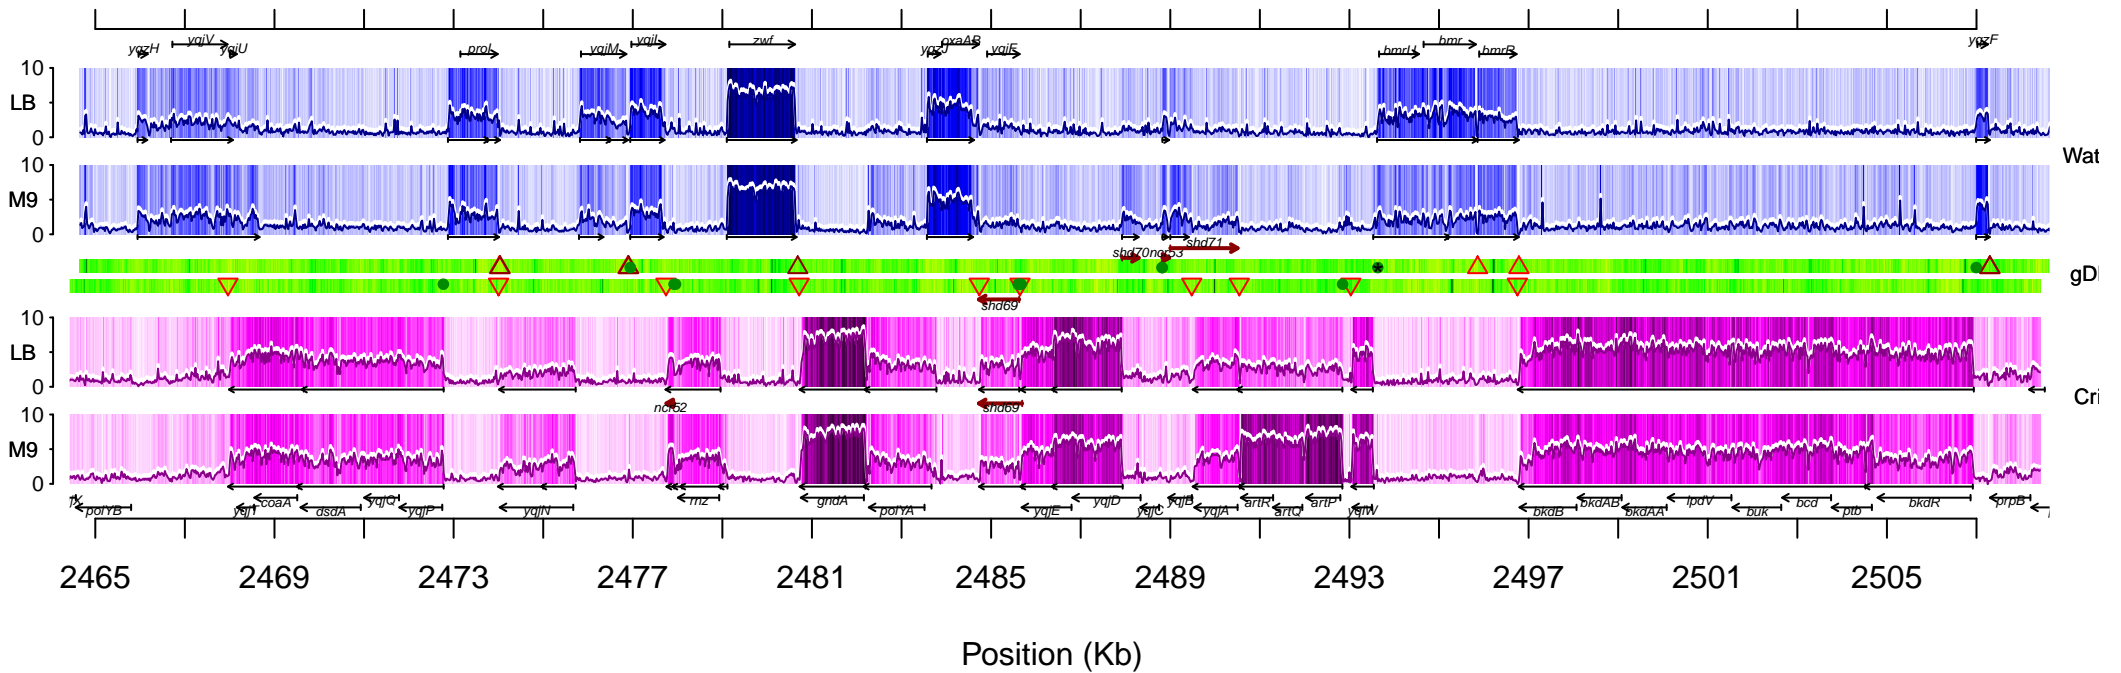

## 2509 – 2552 Kb

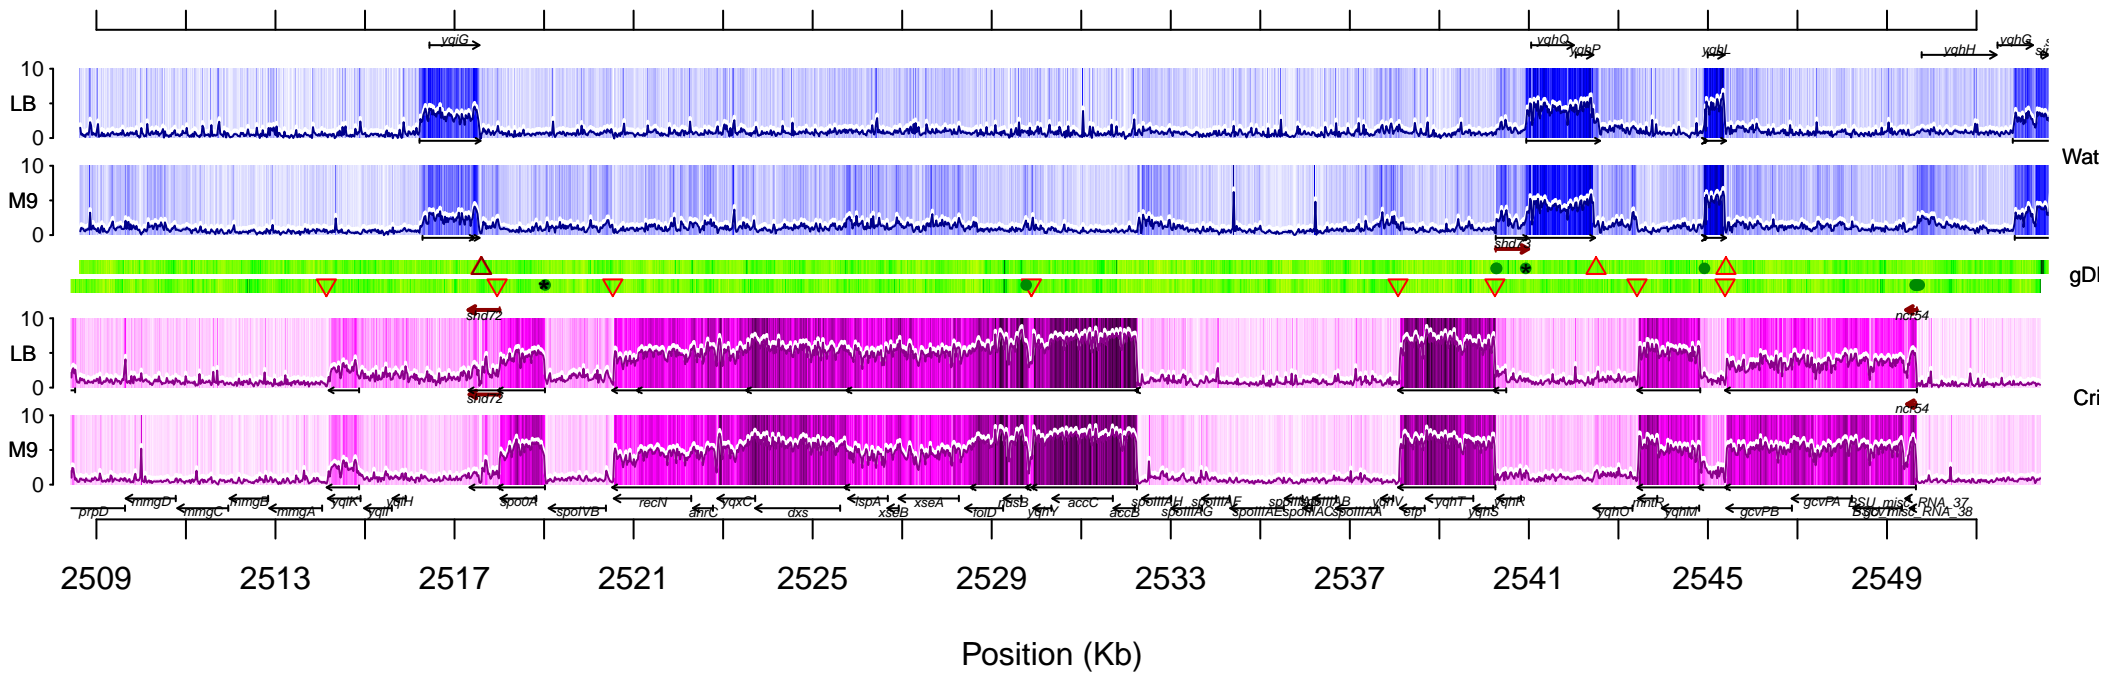

## 2553 – 2596 Kb

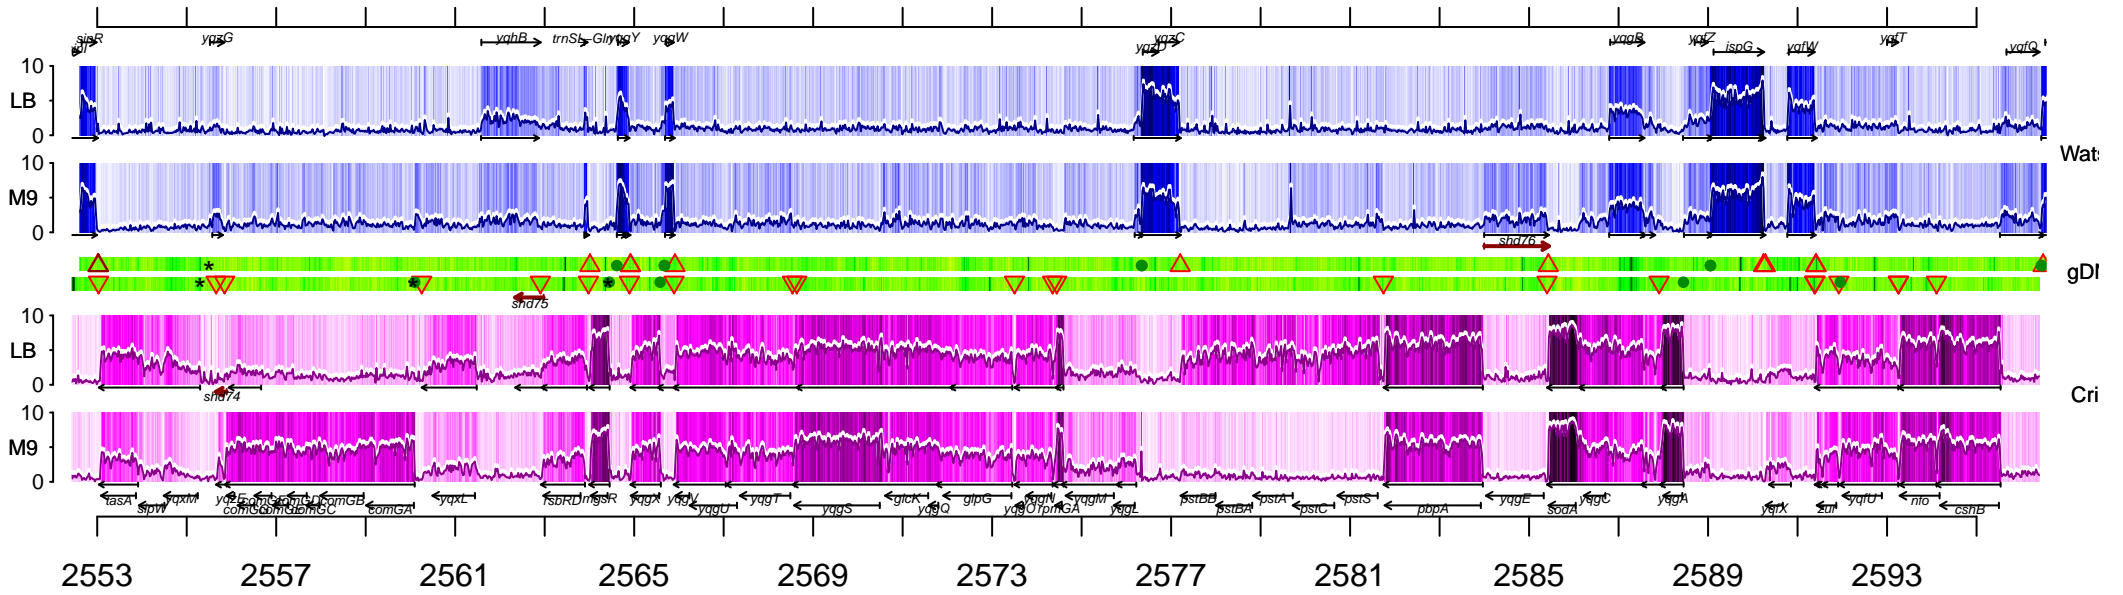

Position (Kb)

## 2597 – 2640 Kb

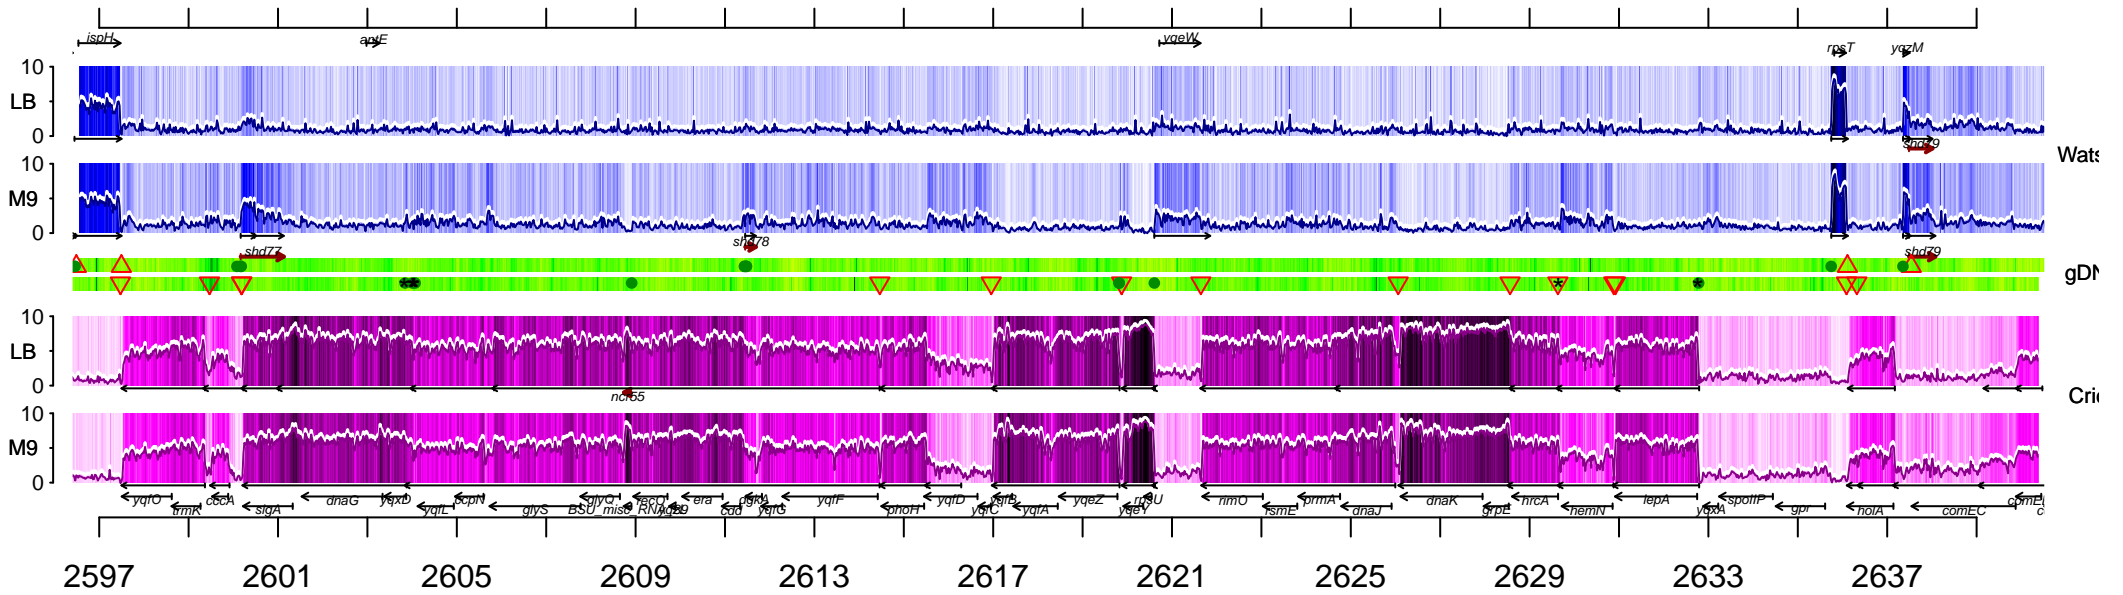

Position (Kb)





### 2729 – 2772 Kb

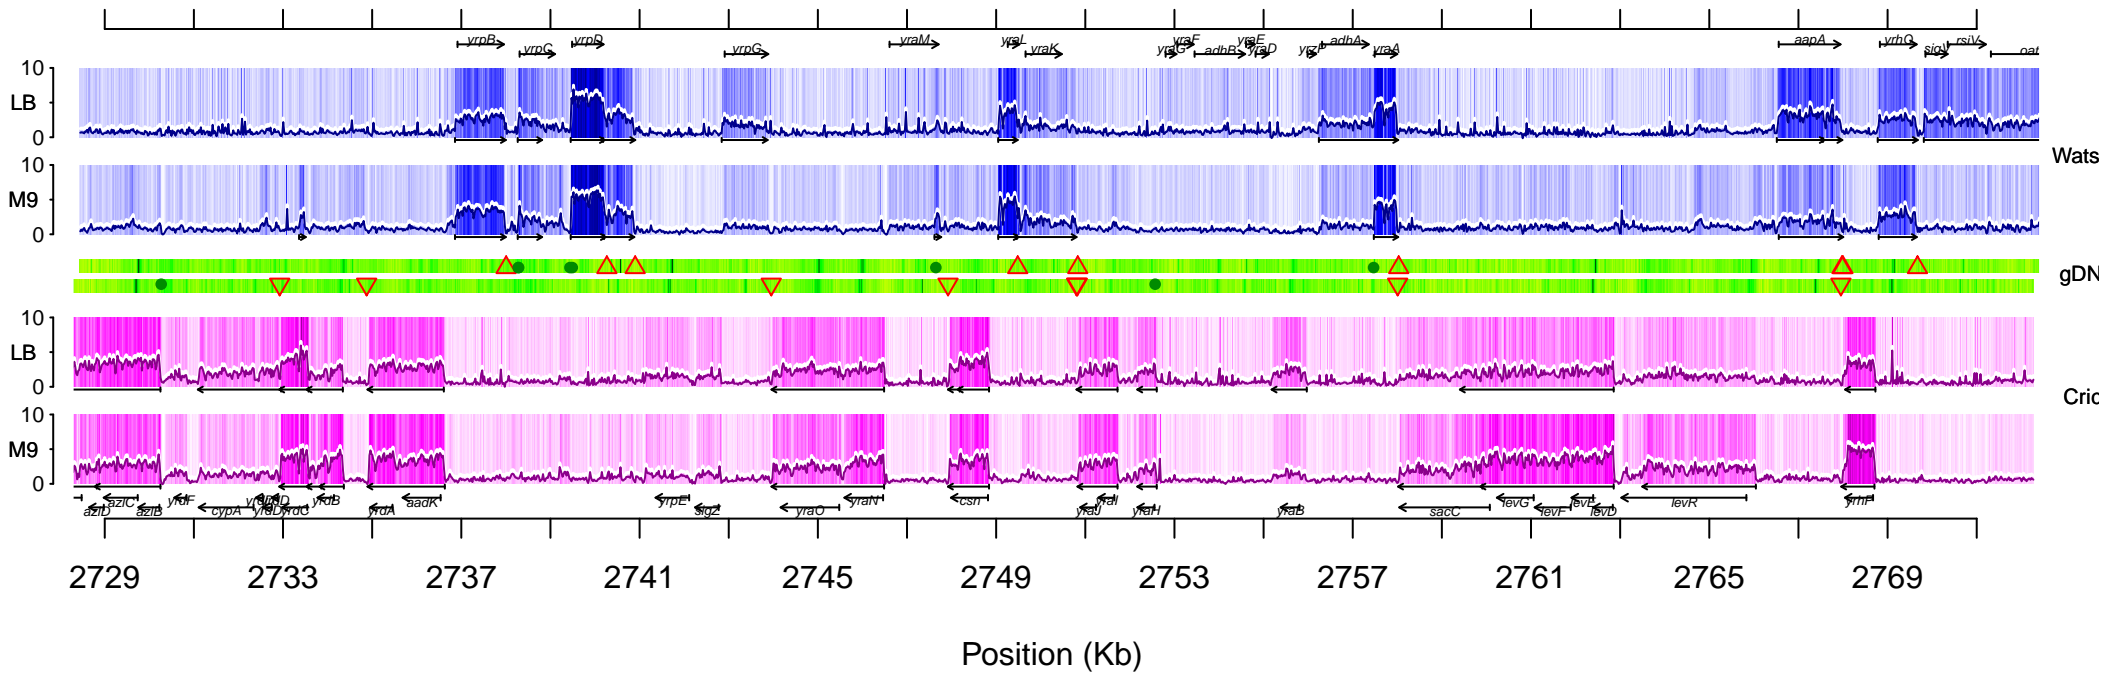

### 2772 – 2816 Kb

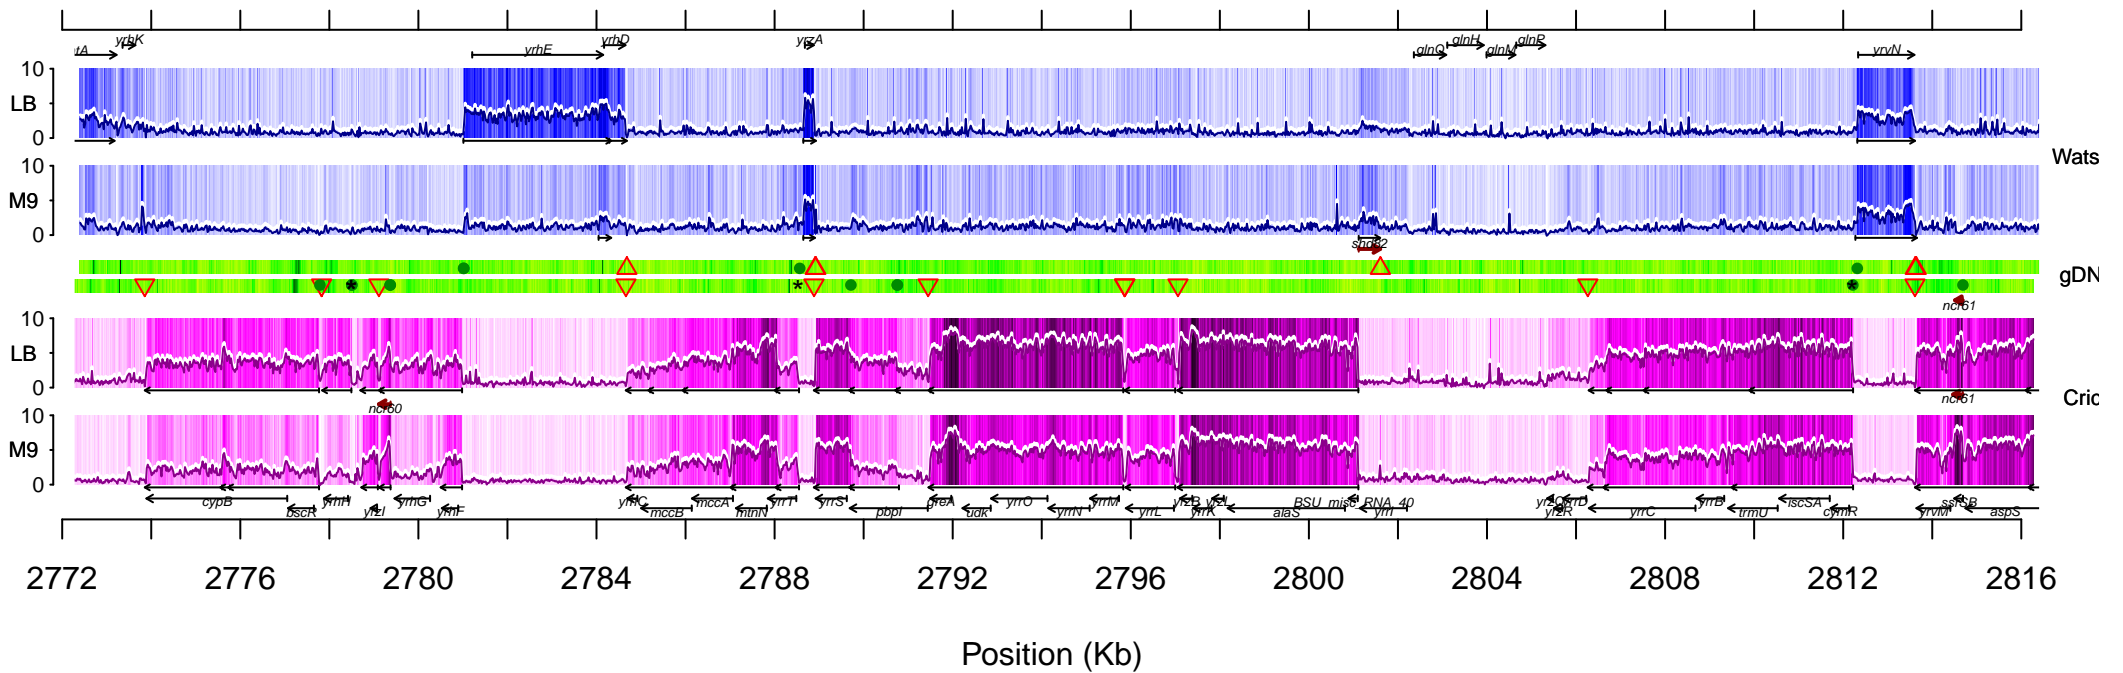

### 2816 – 2860 Kb

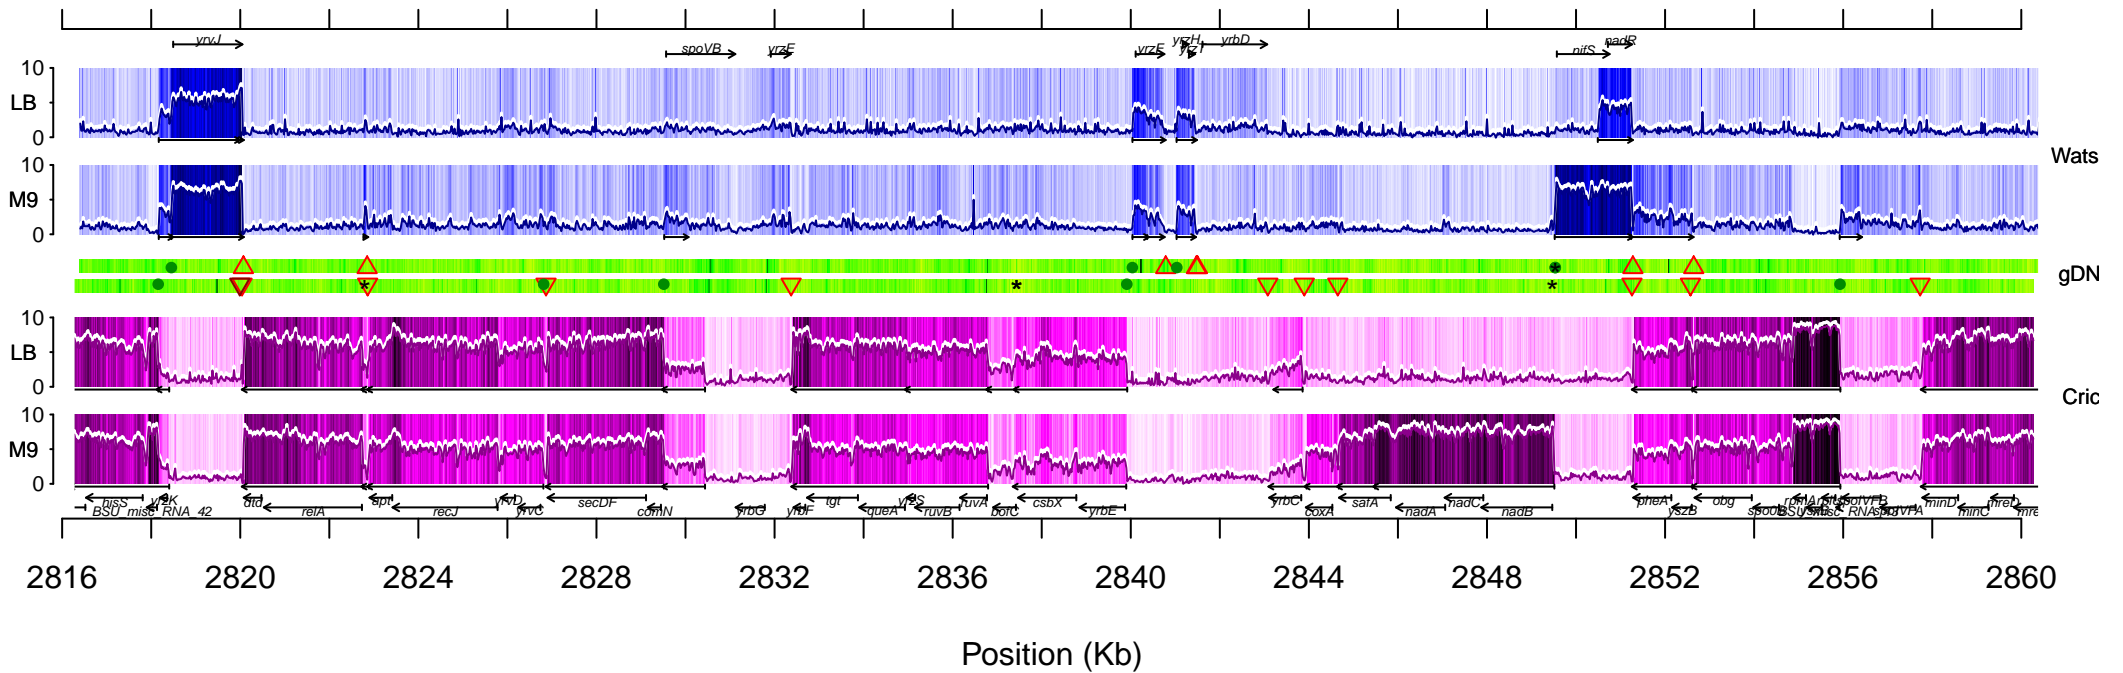

### 2860 – 2904 Kb

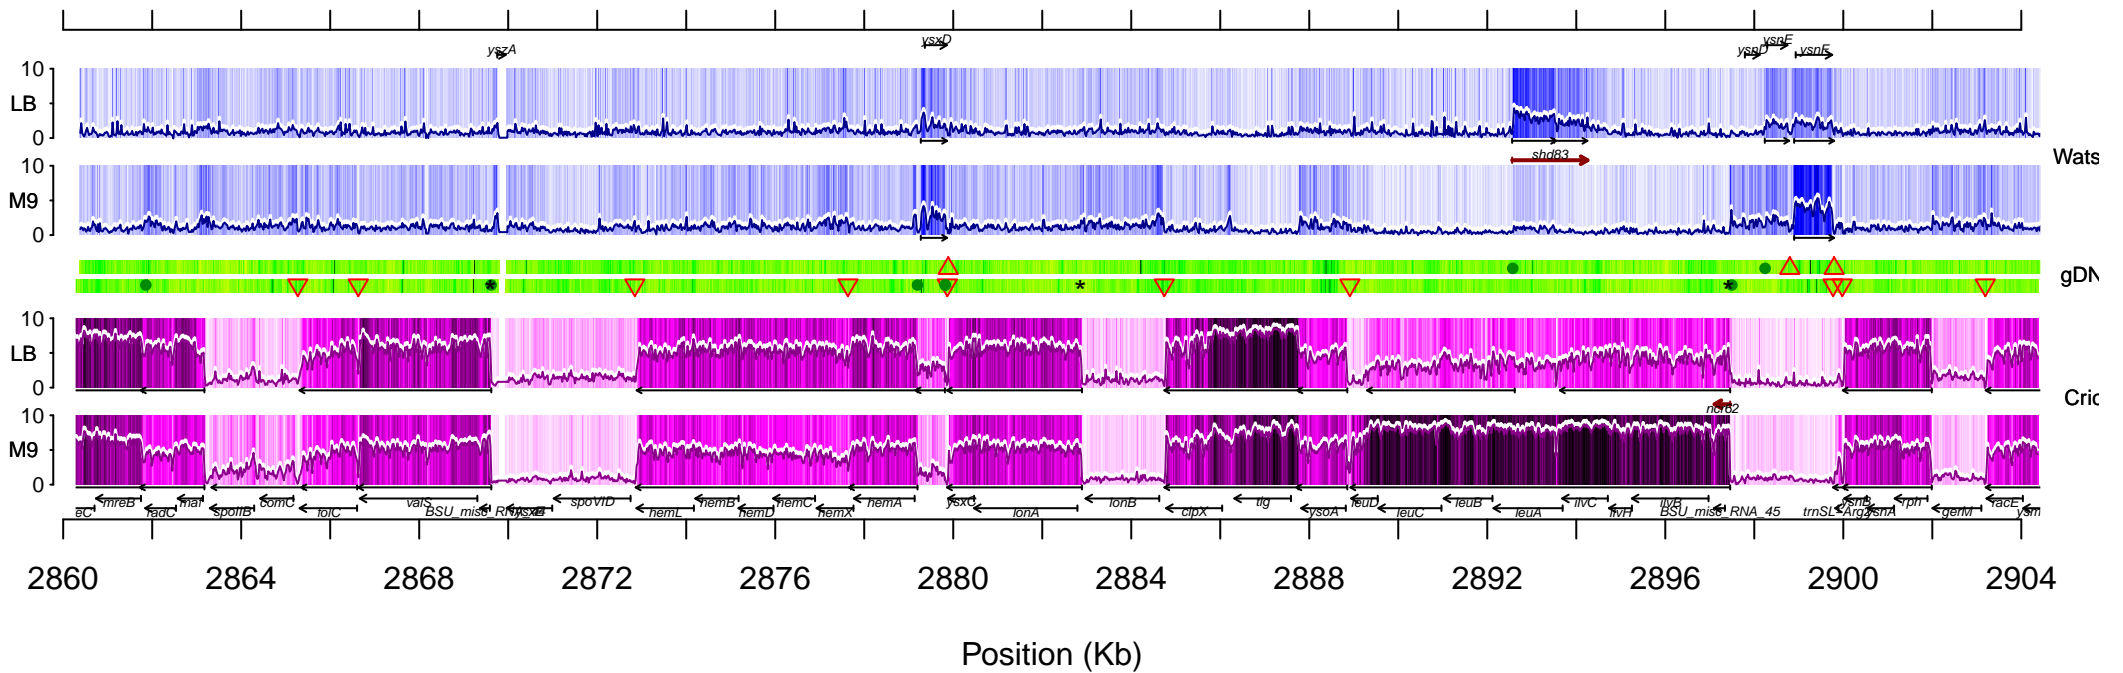

## 2904 – 2948 Kb

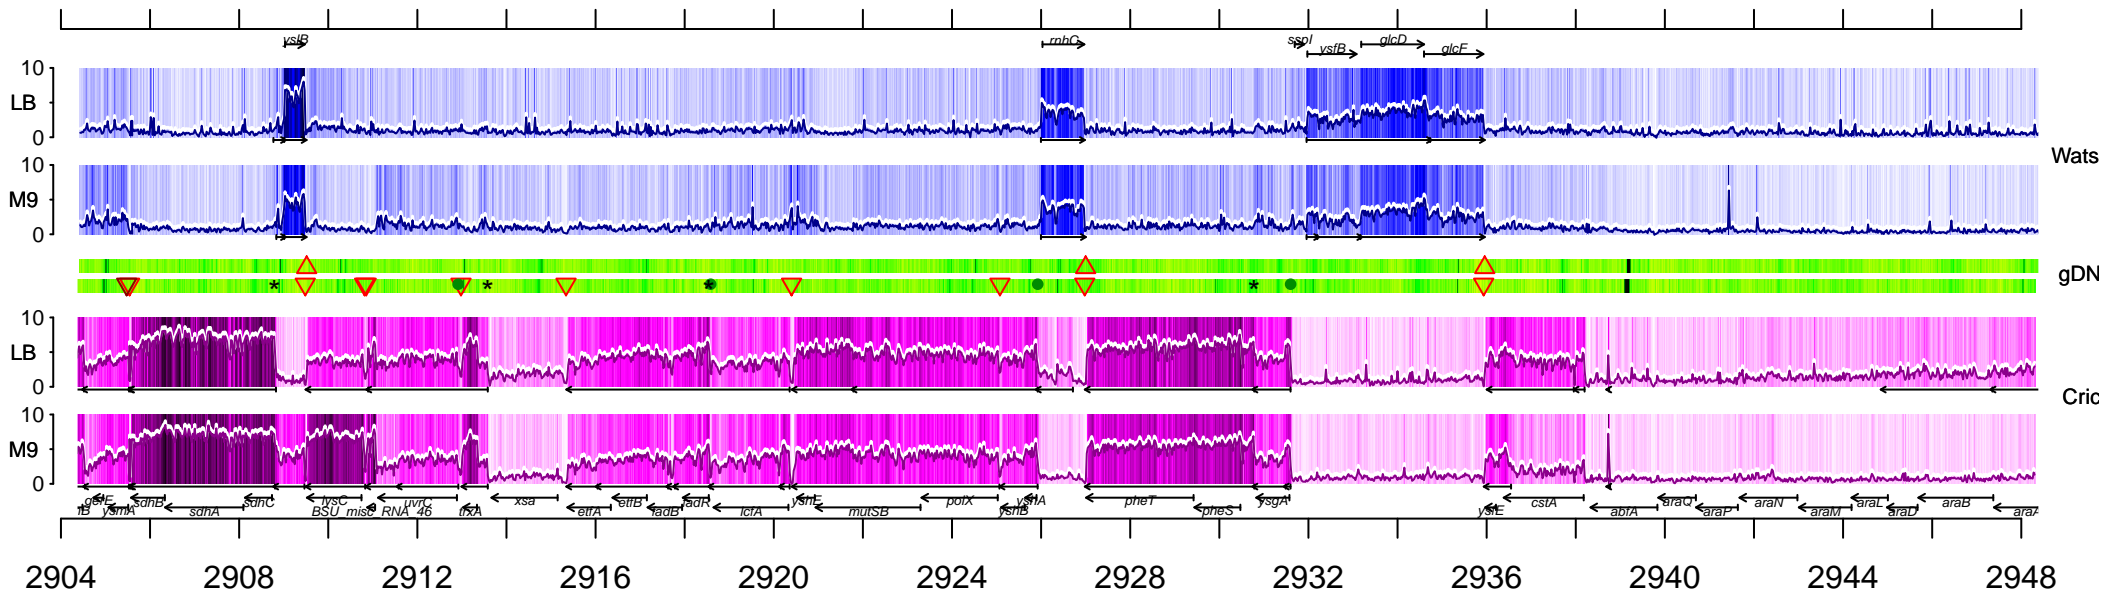

## 2948 – 2992 Kb

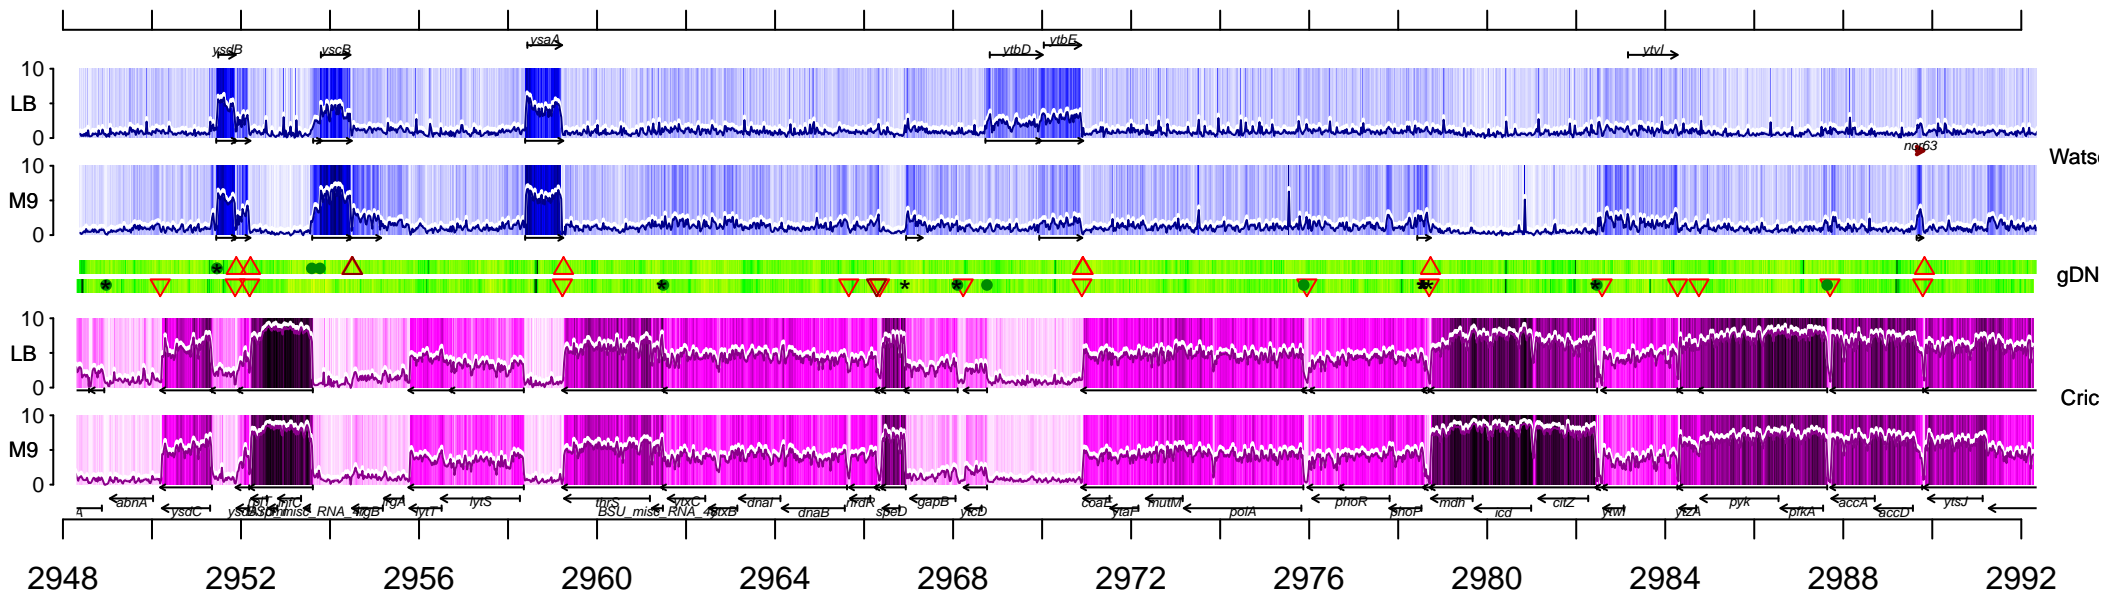

### 2992 – 3036 Kb

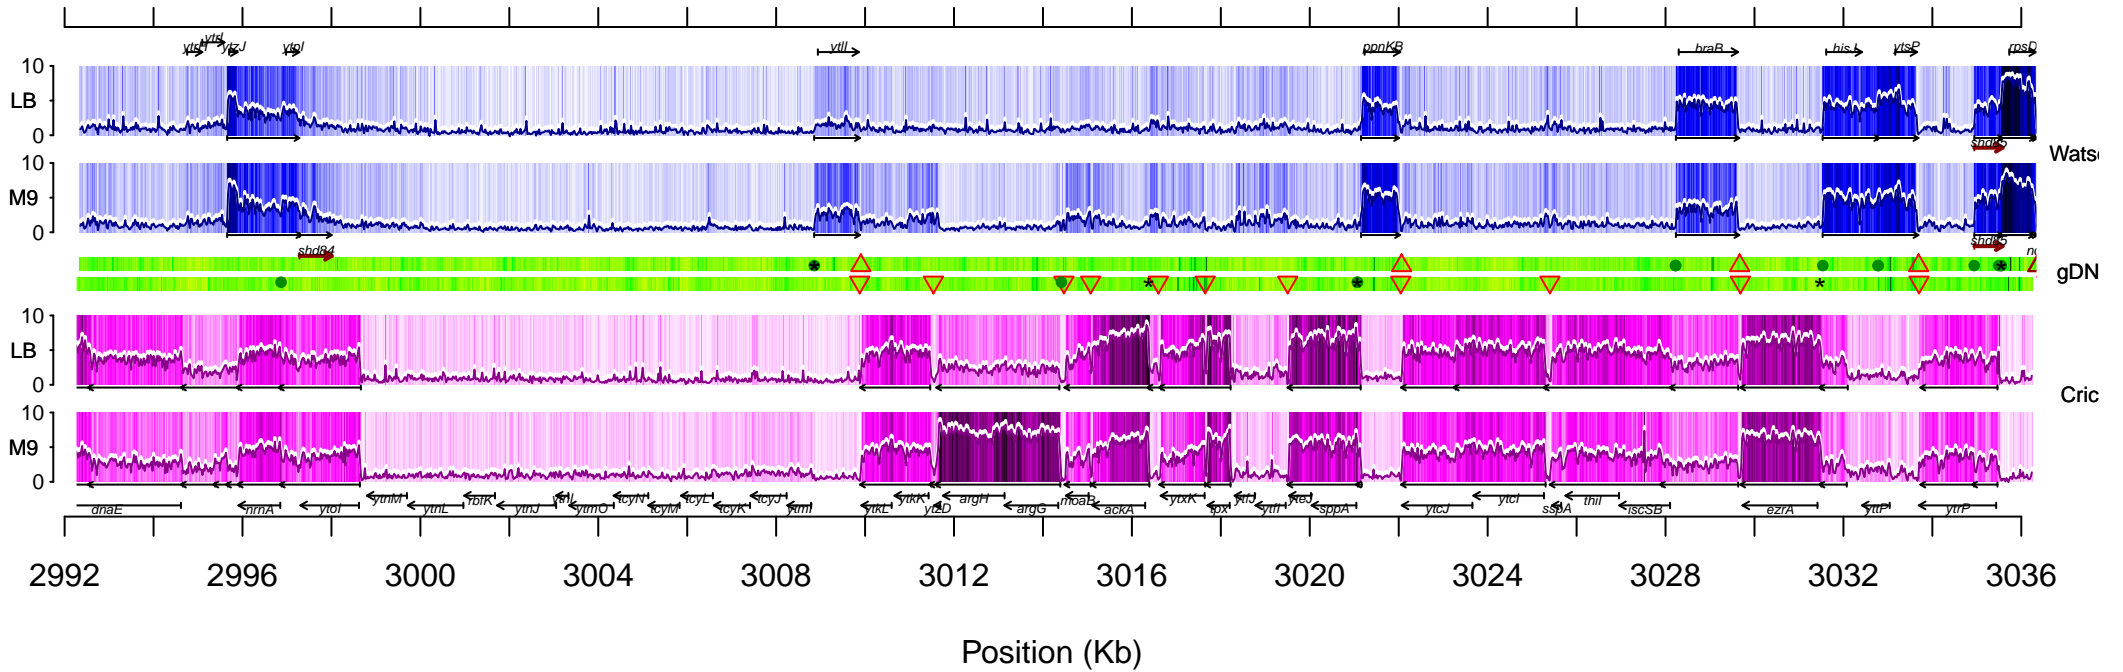

### 3036 – 3080 Kb

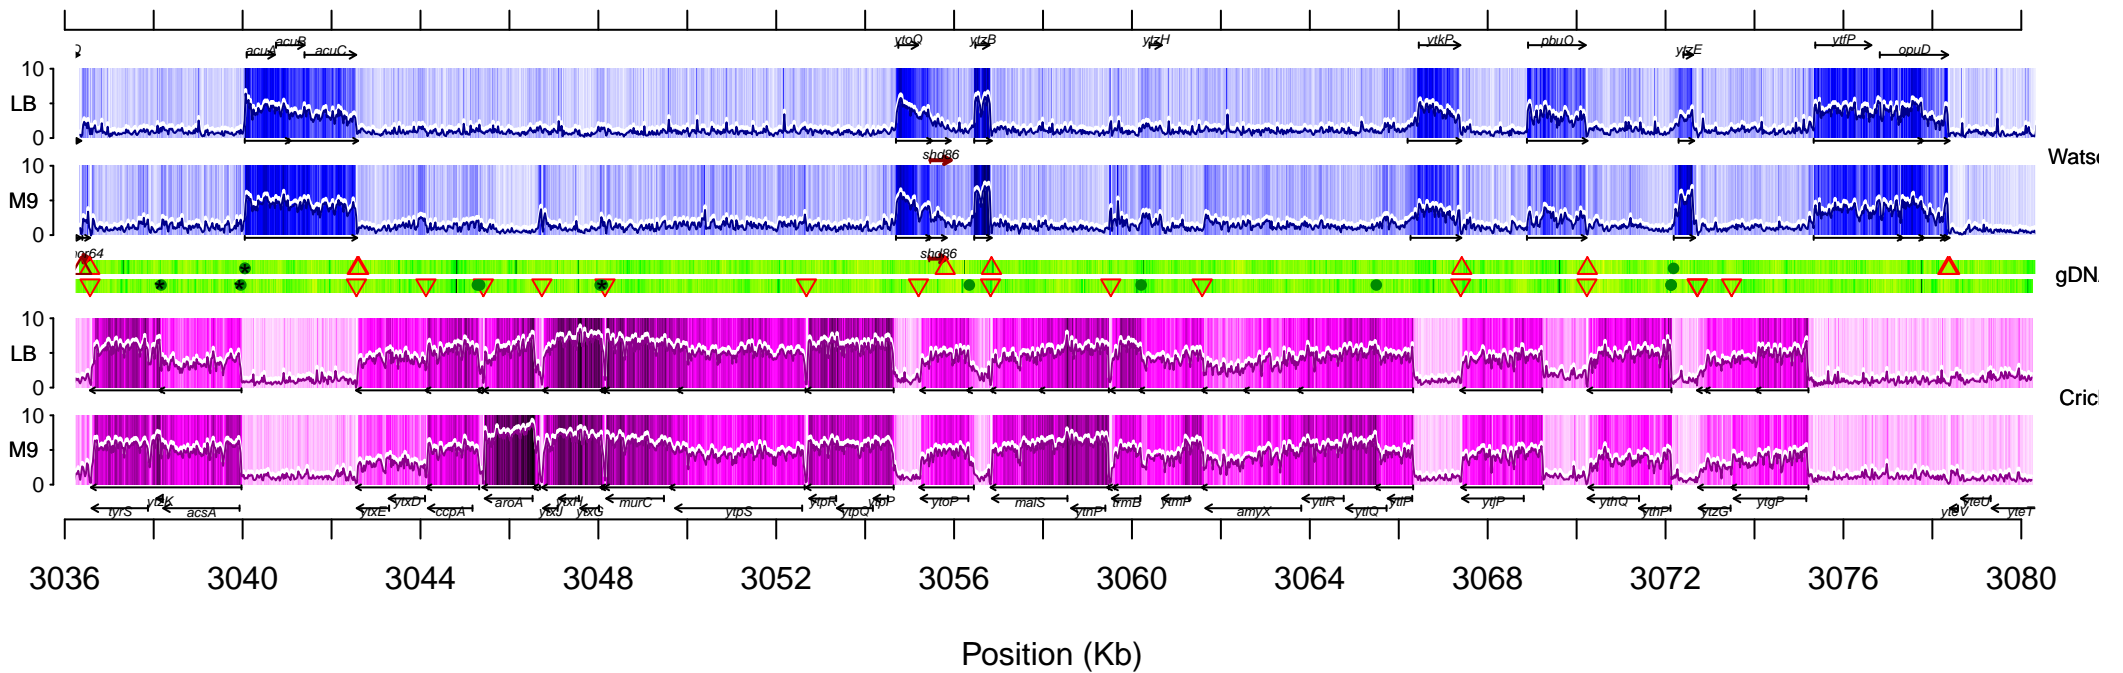

### 3080 – 3124 Kb

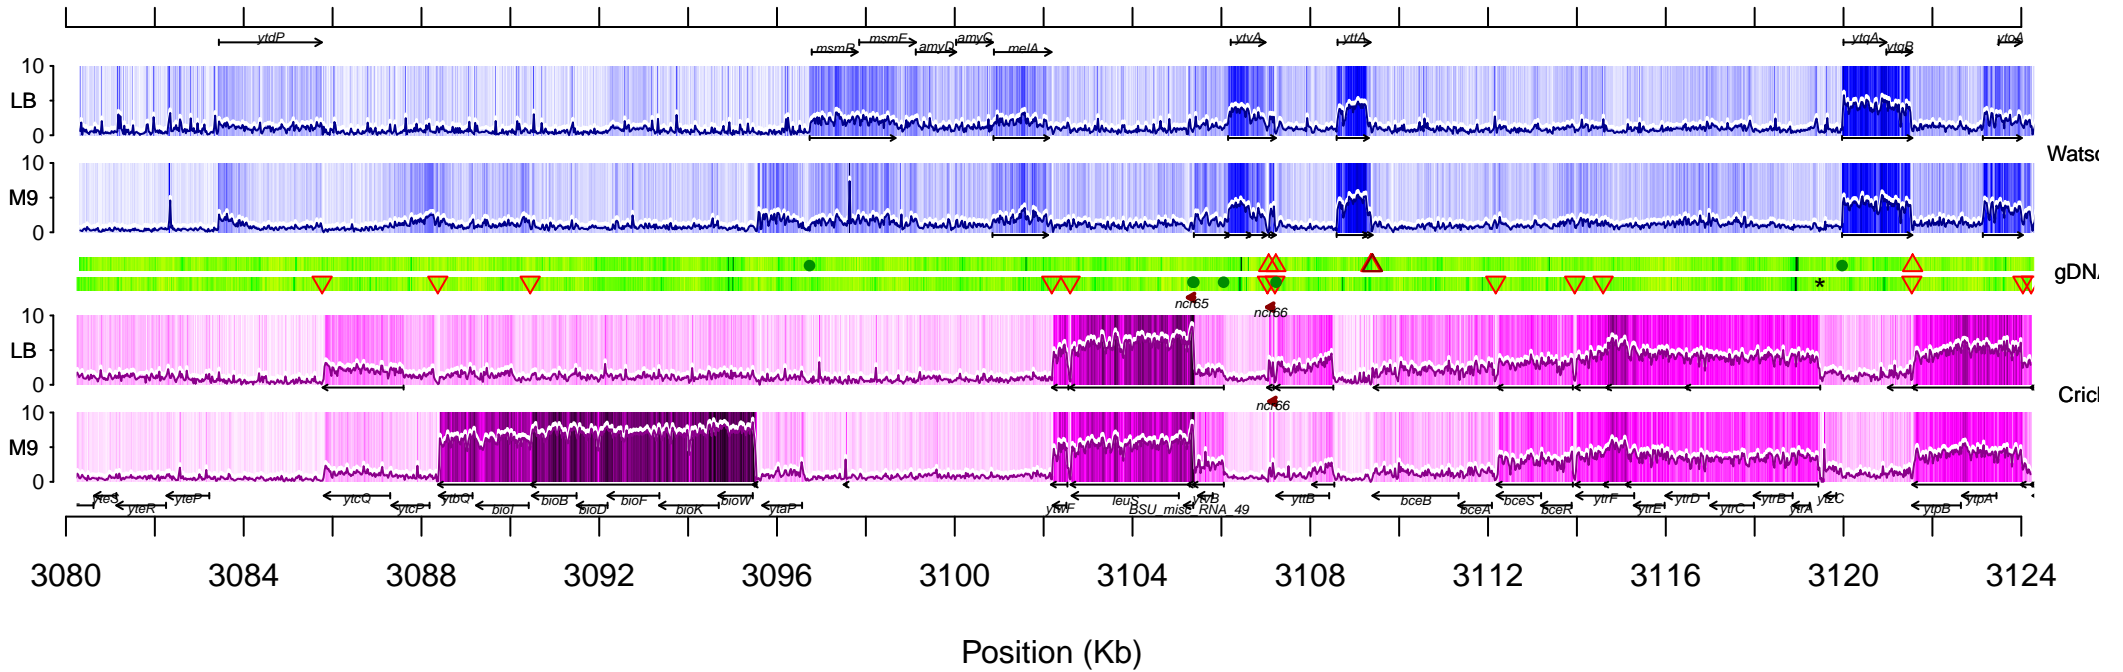

### 3124 – 3168 Kb

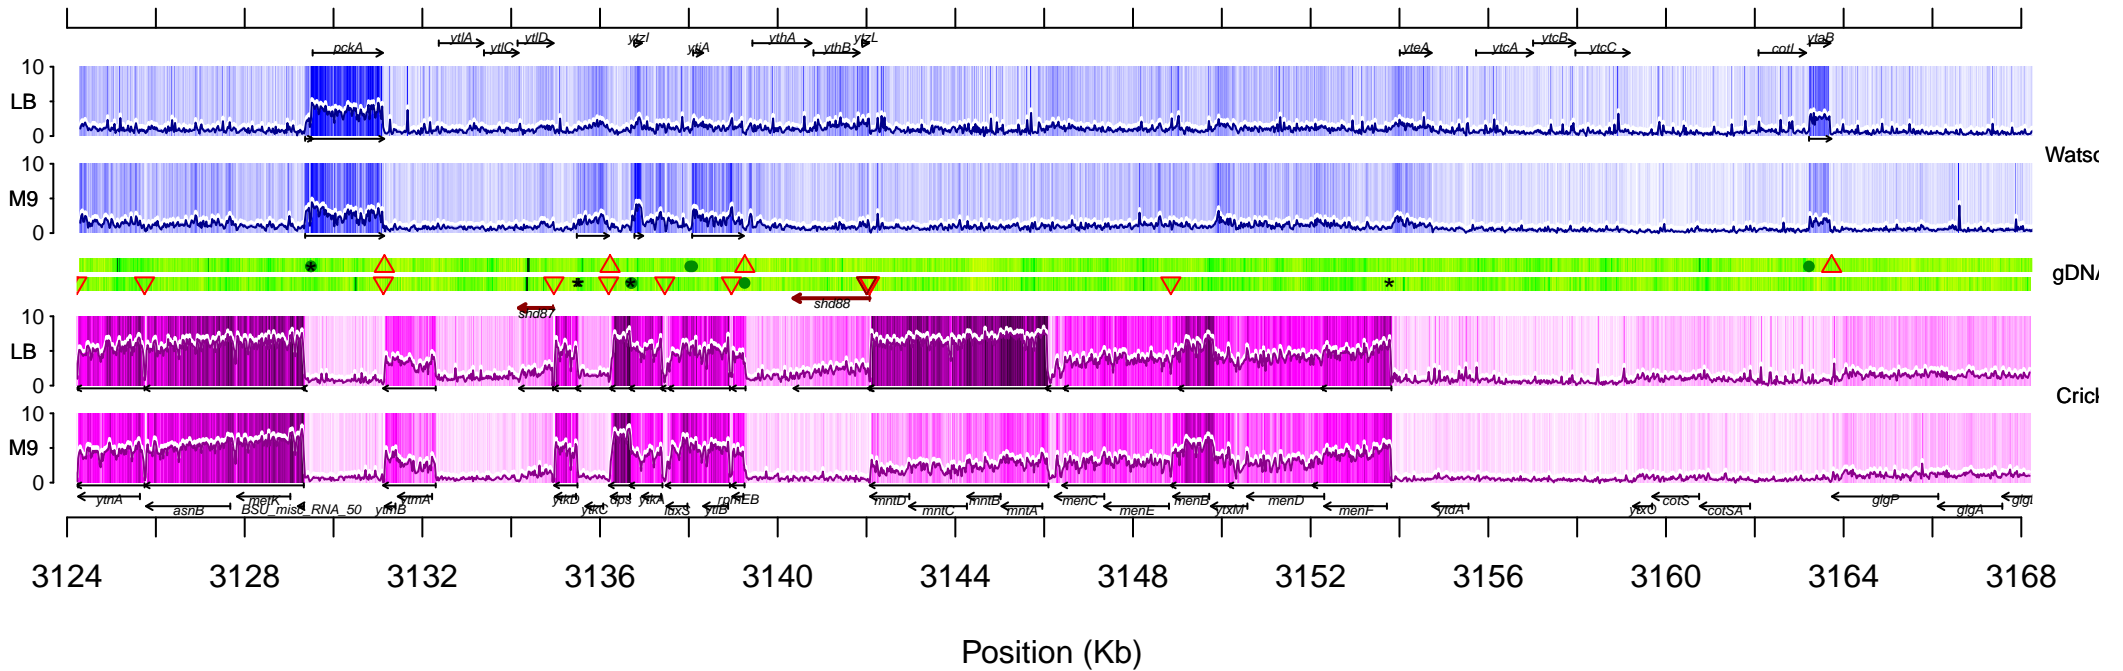

### 3168 – 3212 Kb

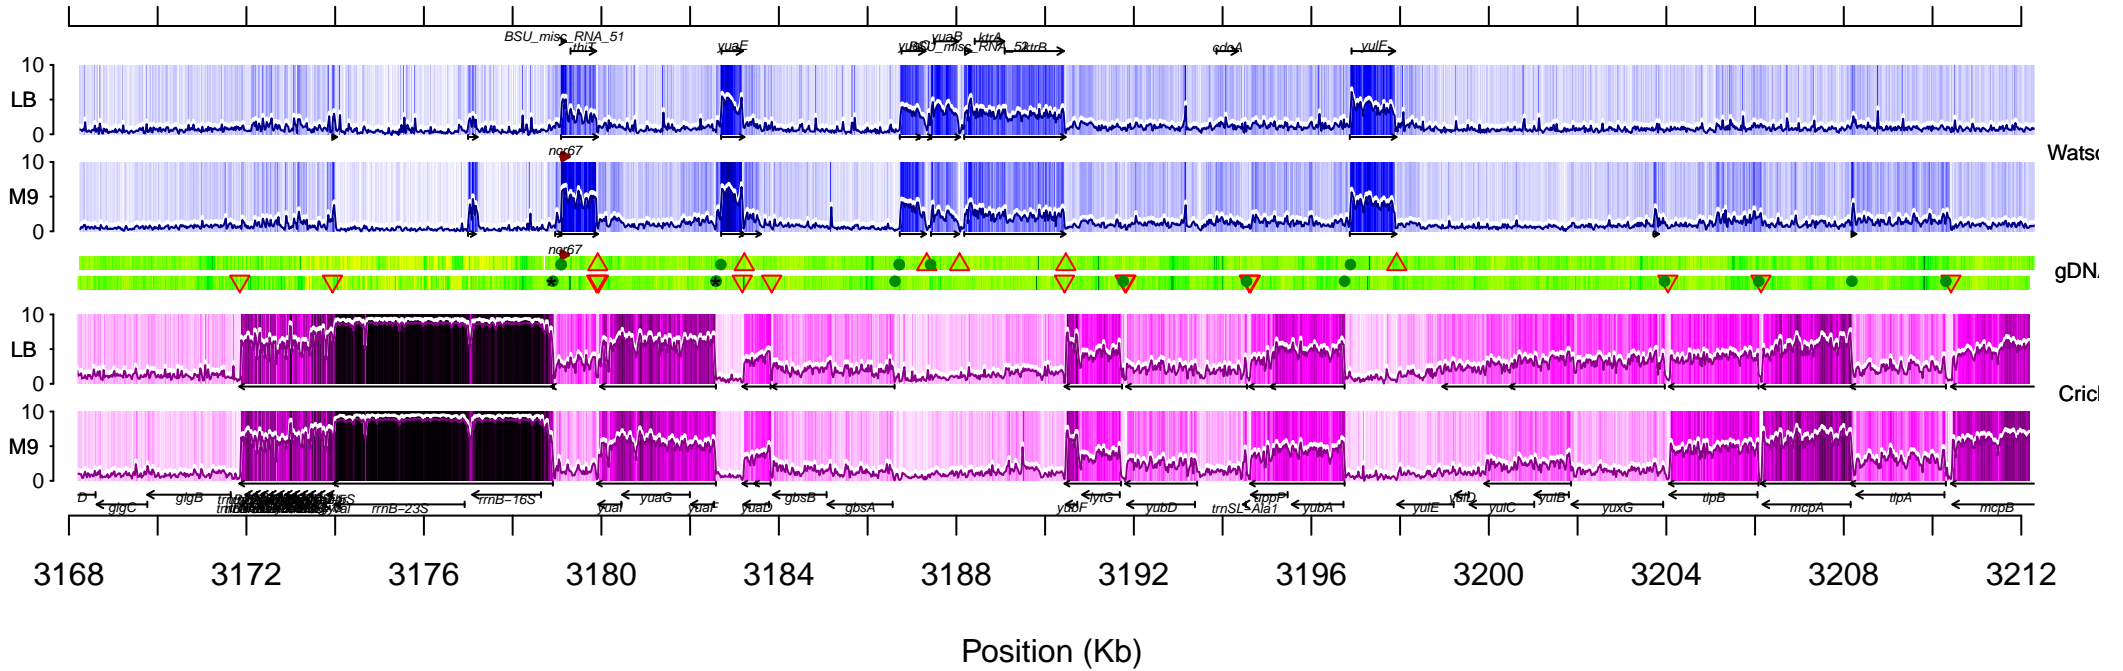

### 3212 – 3256 Kb

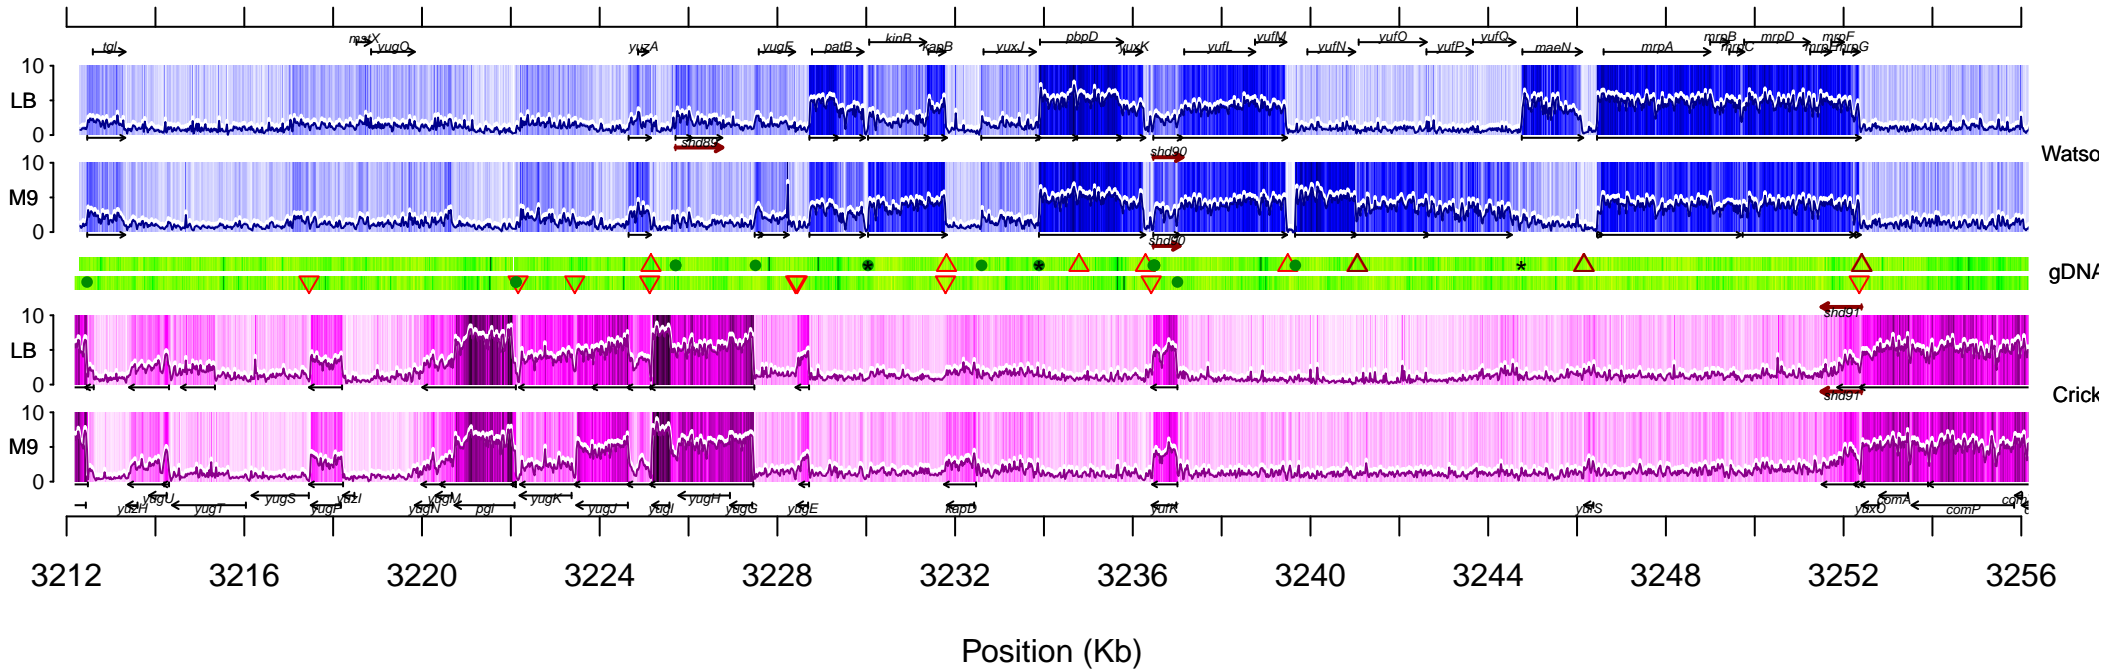

### 3256 – 3300 Kb

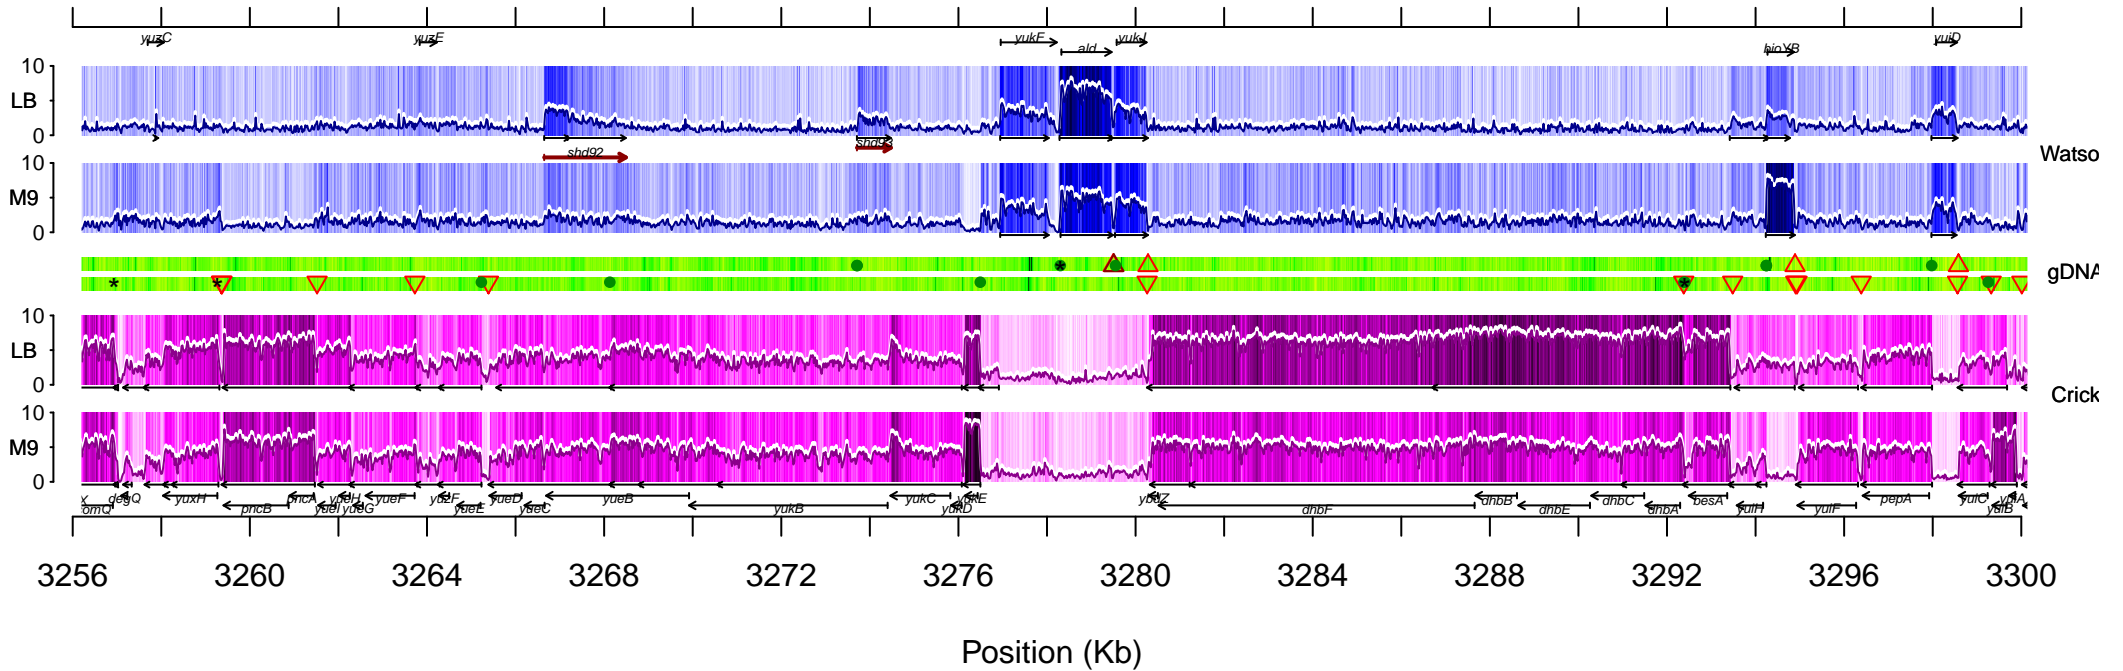

### 3300 – 3344 Kb

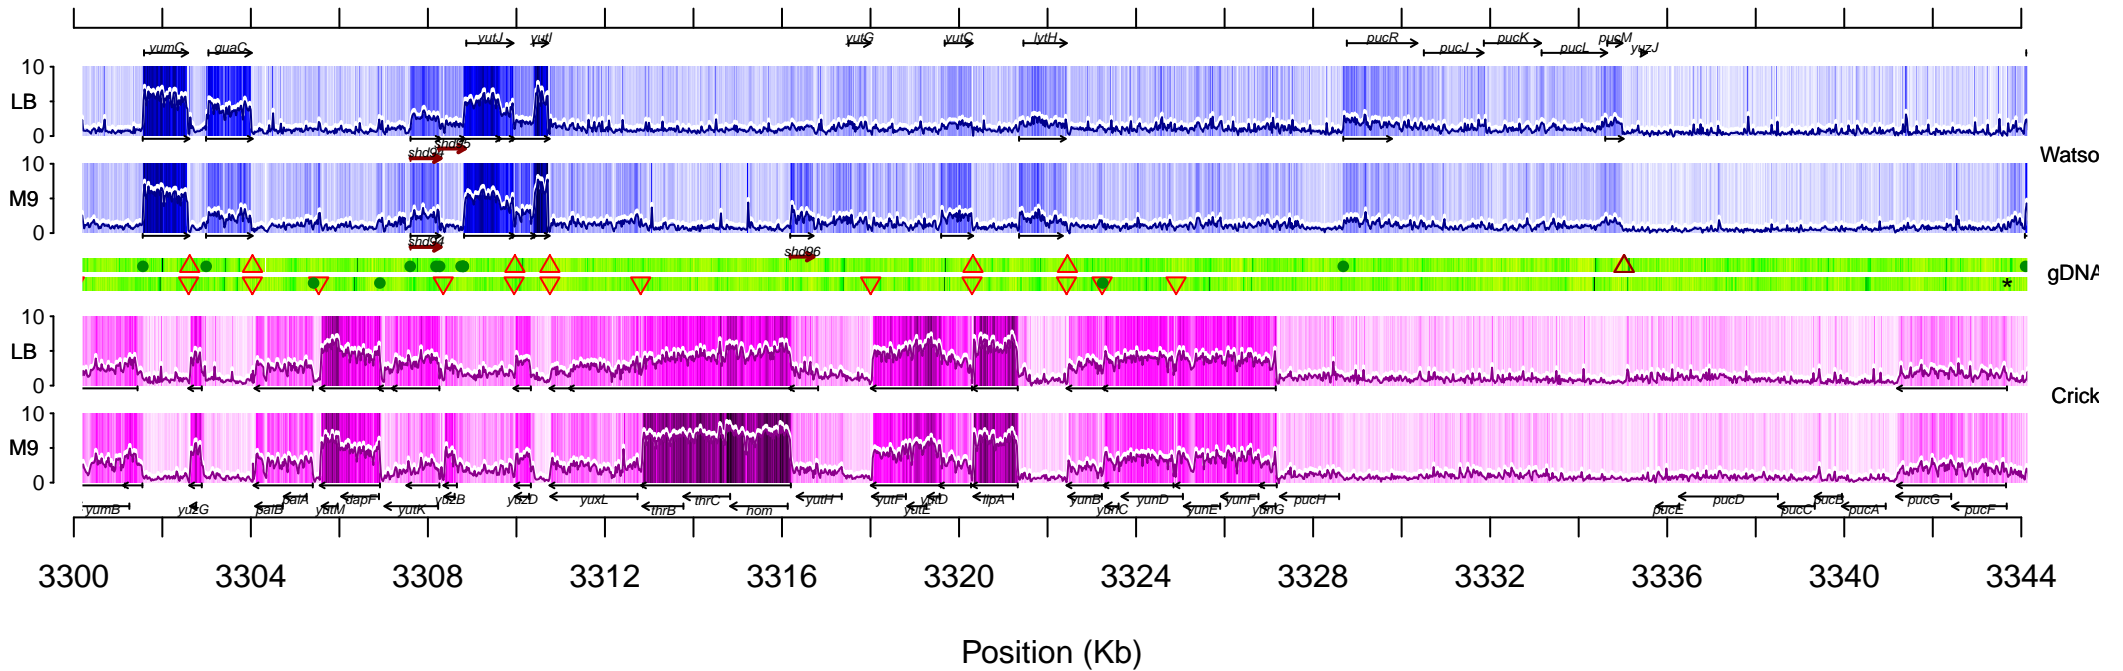

### 3344 – 3388 Kb

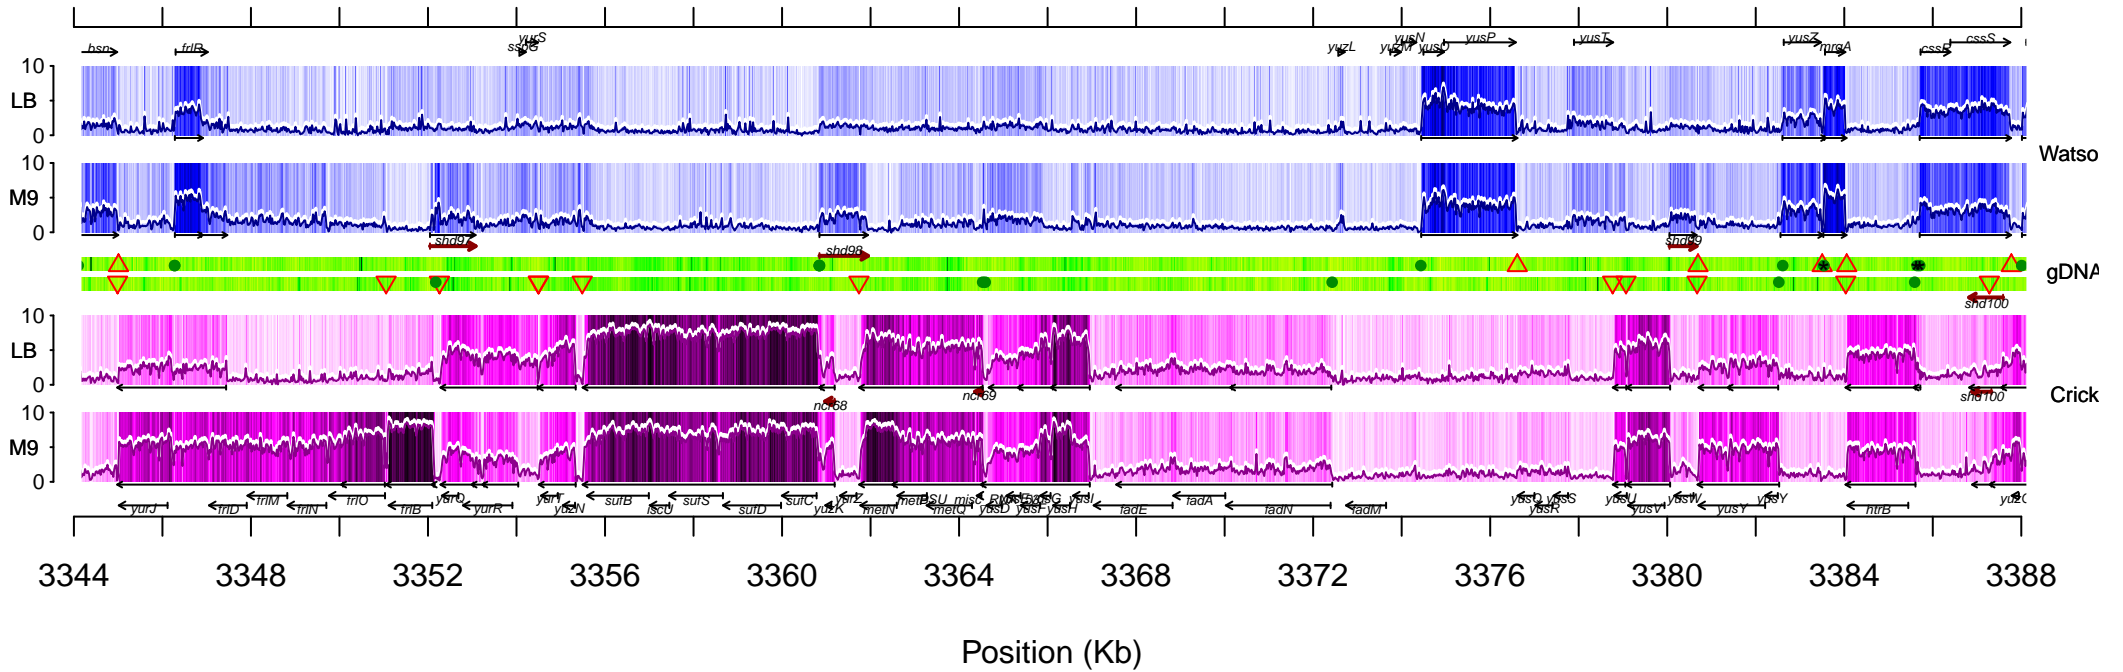

### 3388 – 3432 Kb

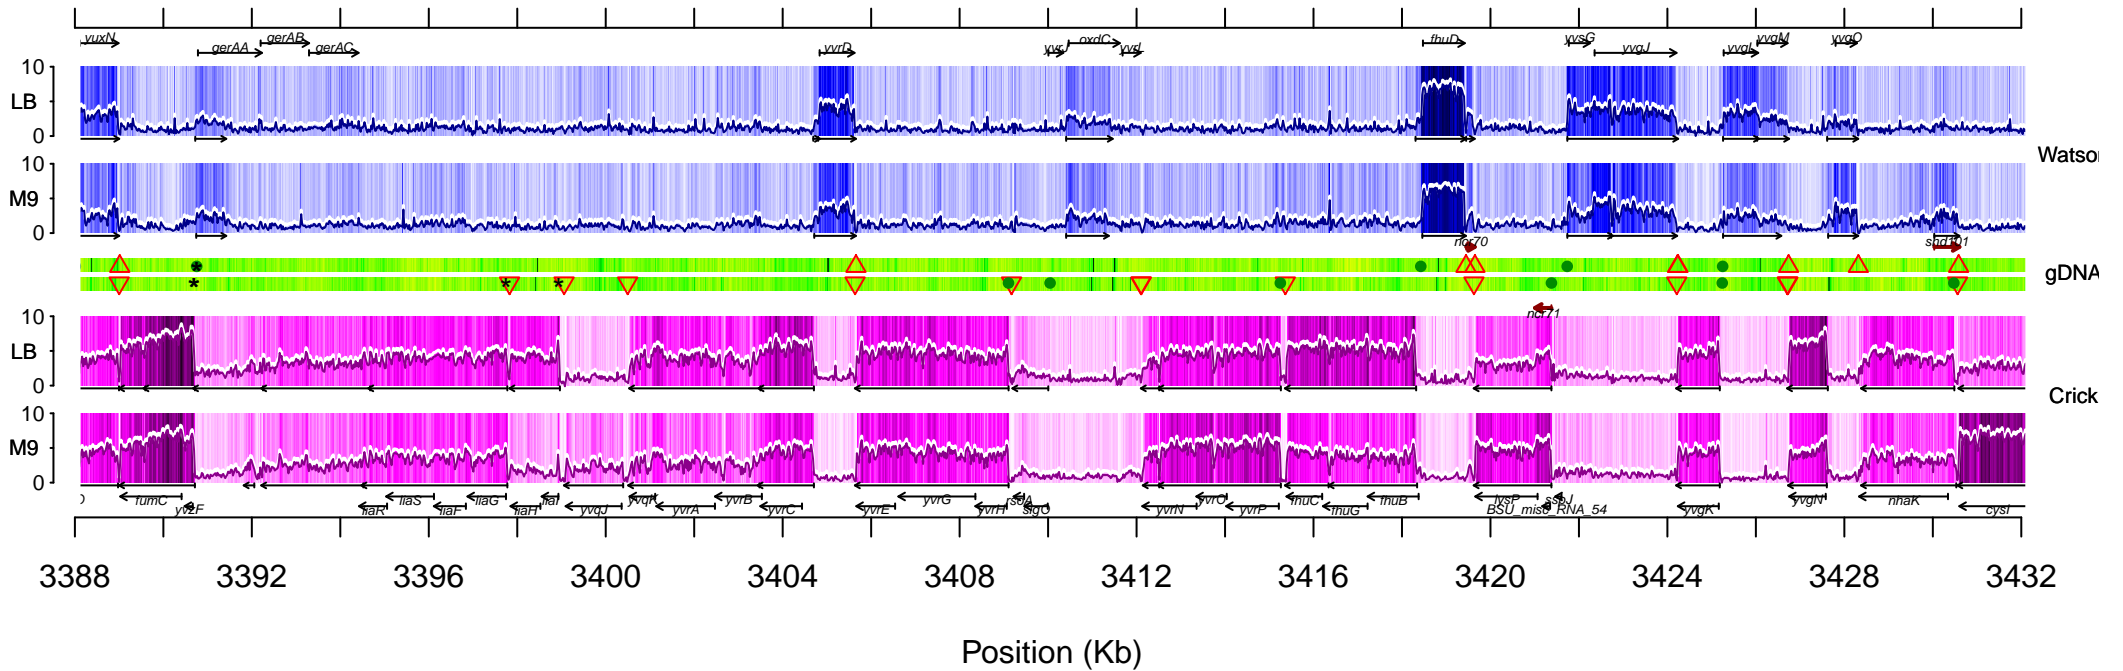



### 3432 – 3476 Kb

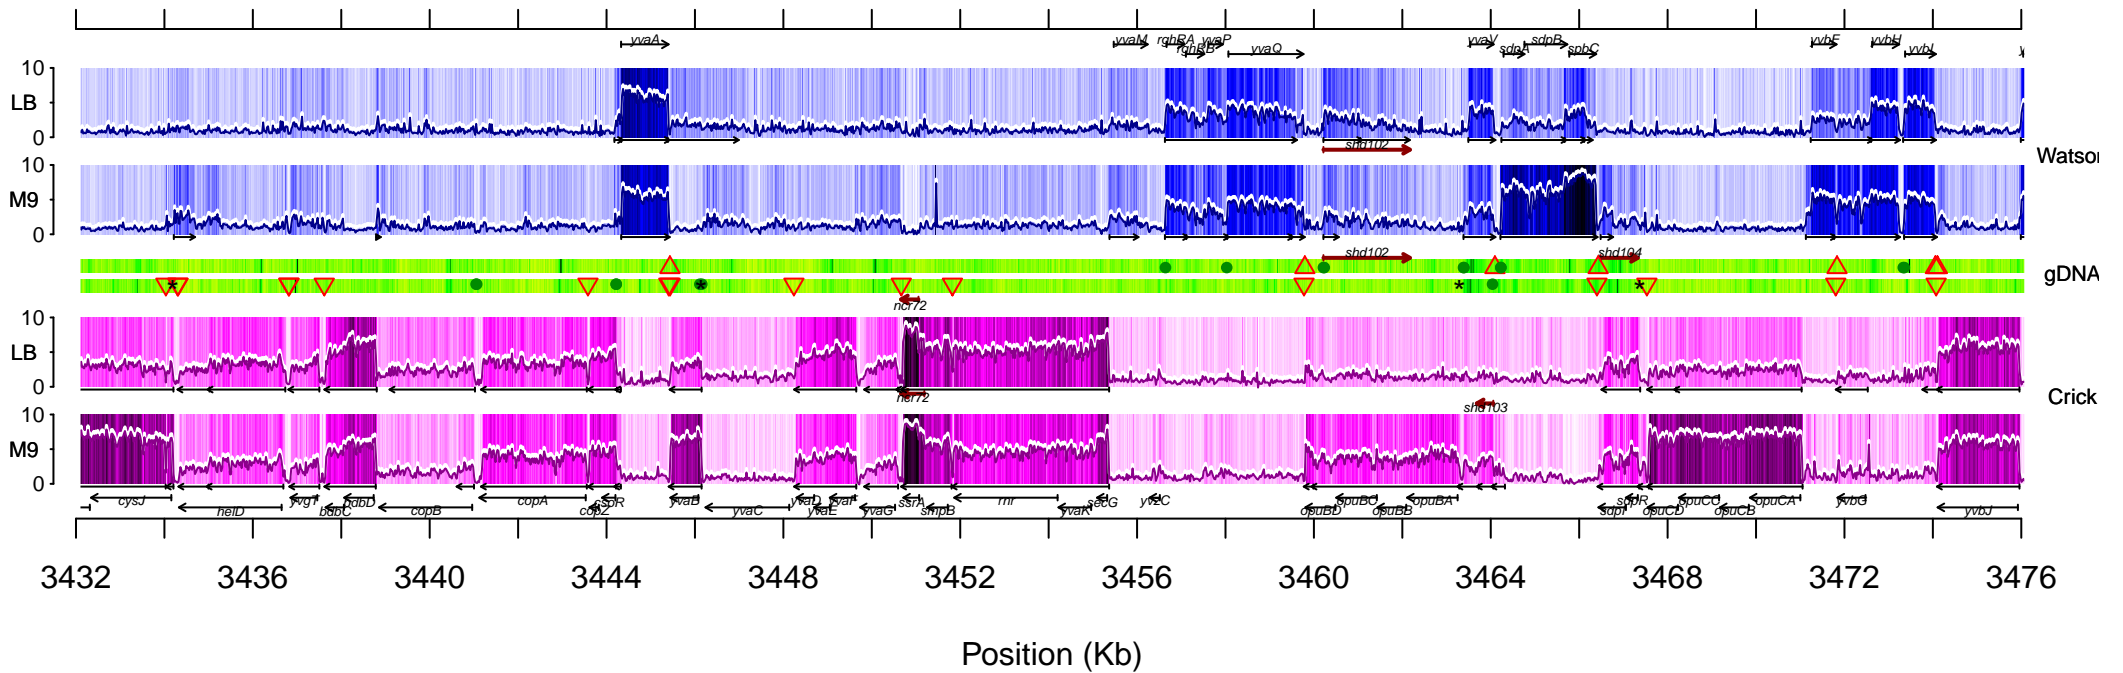

### 3476 – 3520 Kb

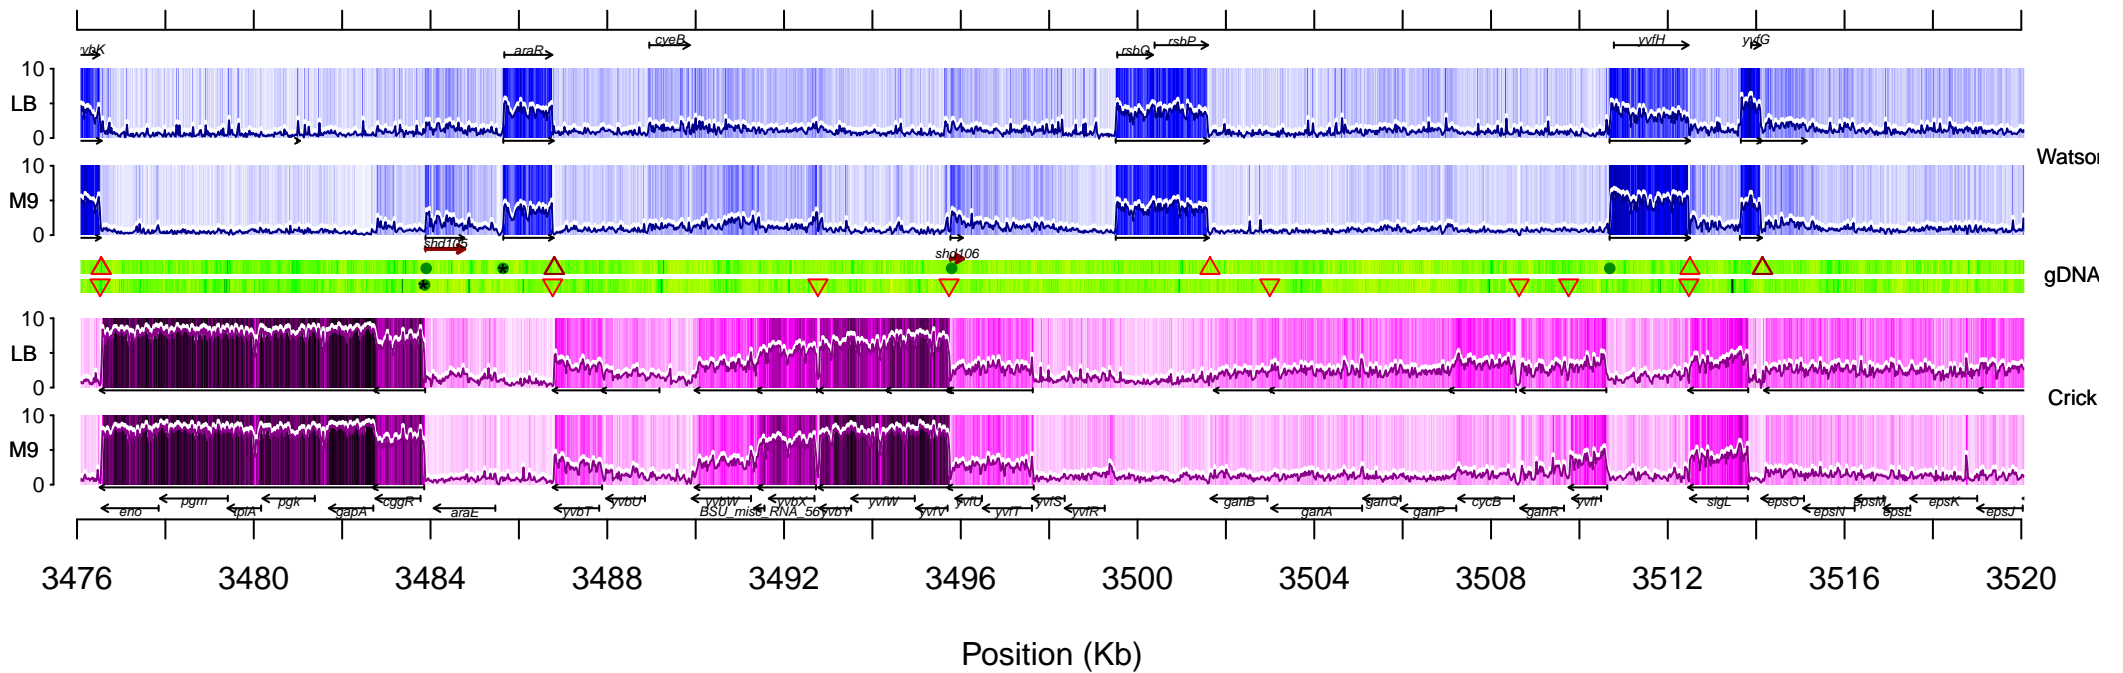

### 3520 – 3564 Kb

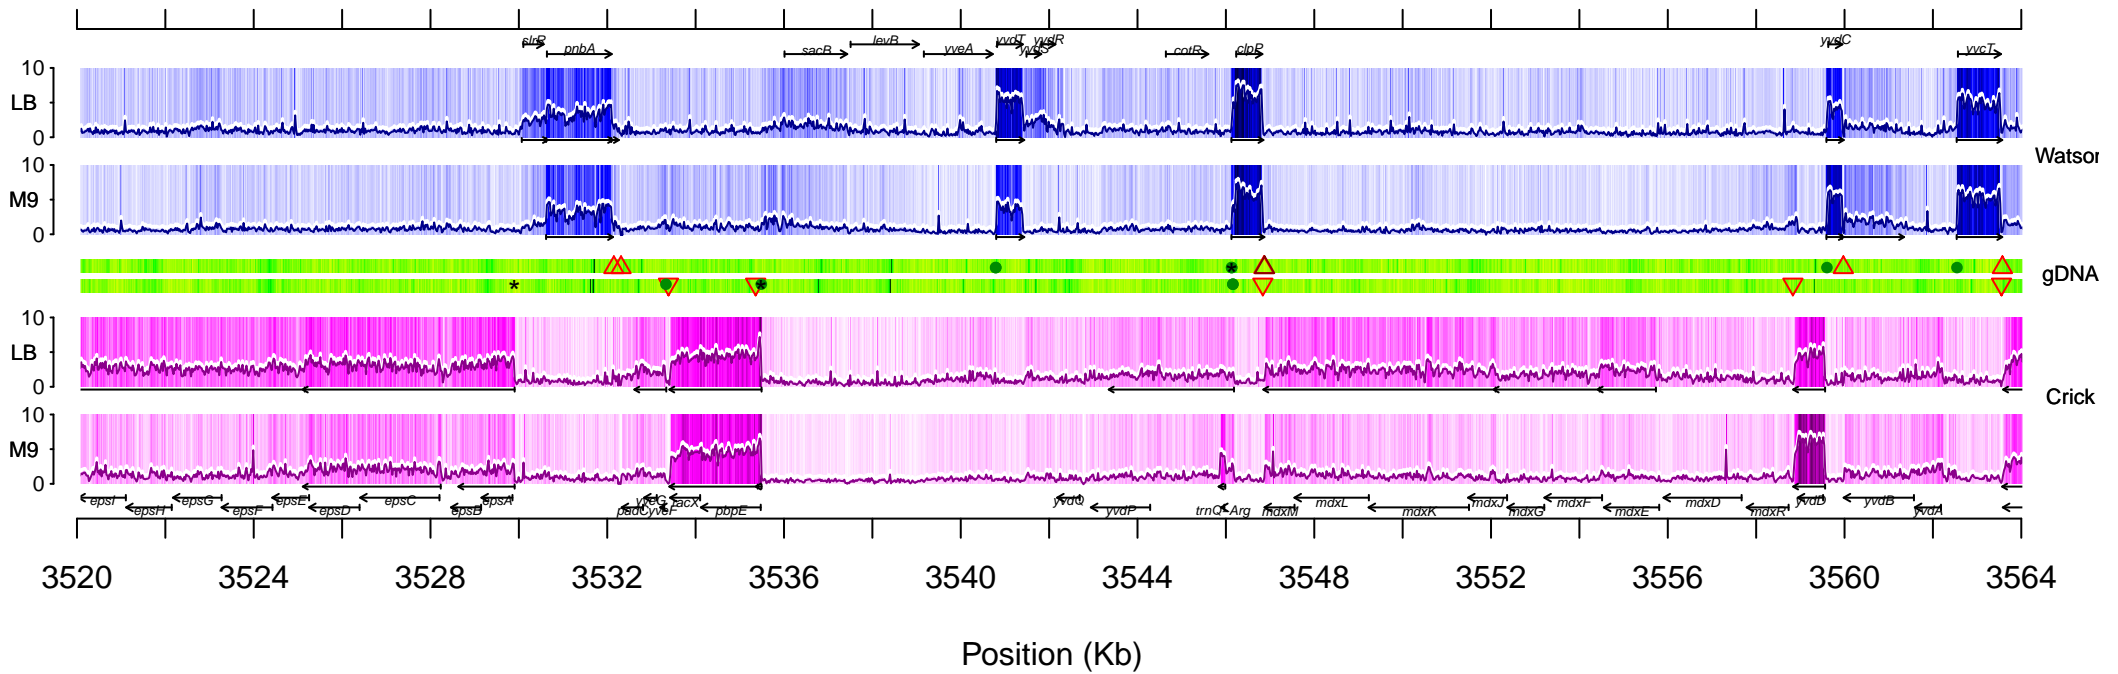

### 3564 – 3608 Kb

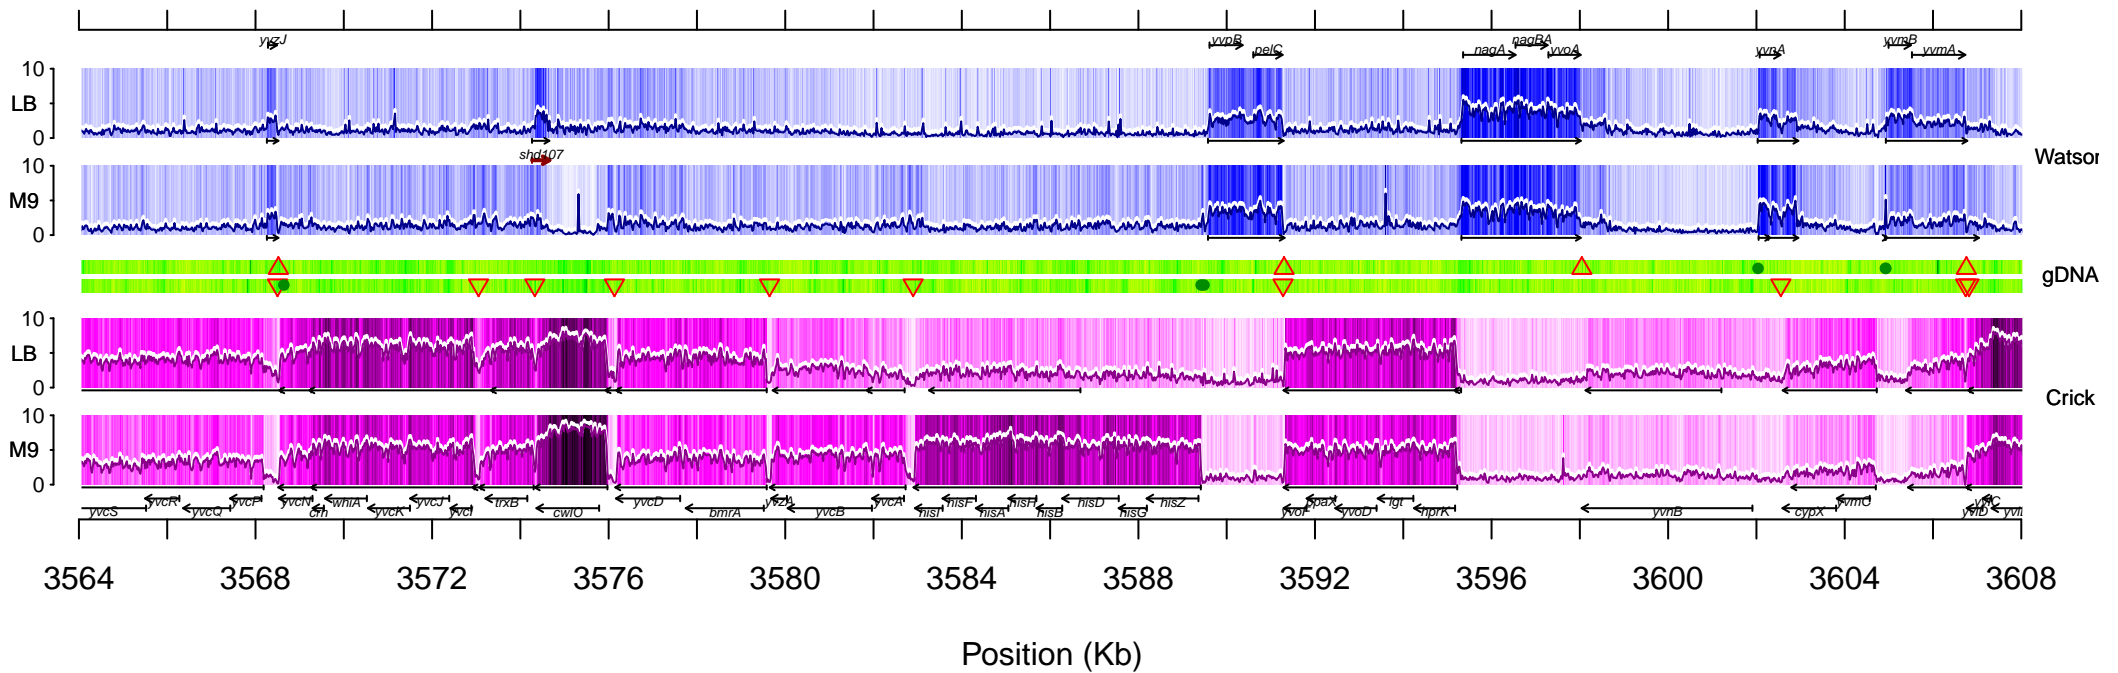

### 3608 – 3652 Kb

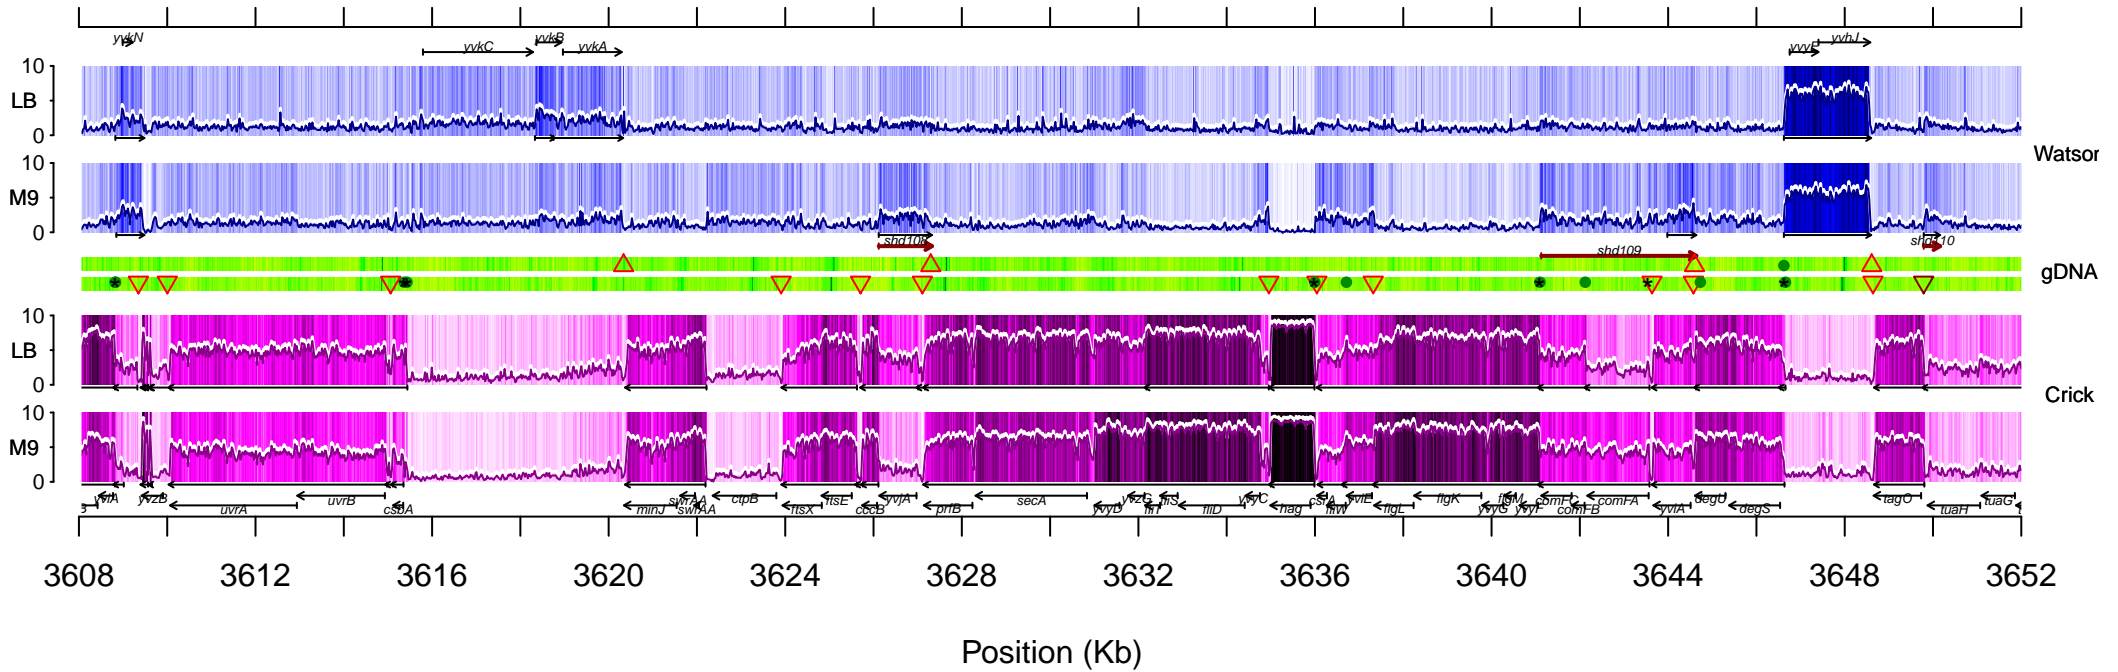

### 3652 – 3696 Kb

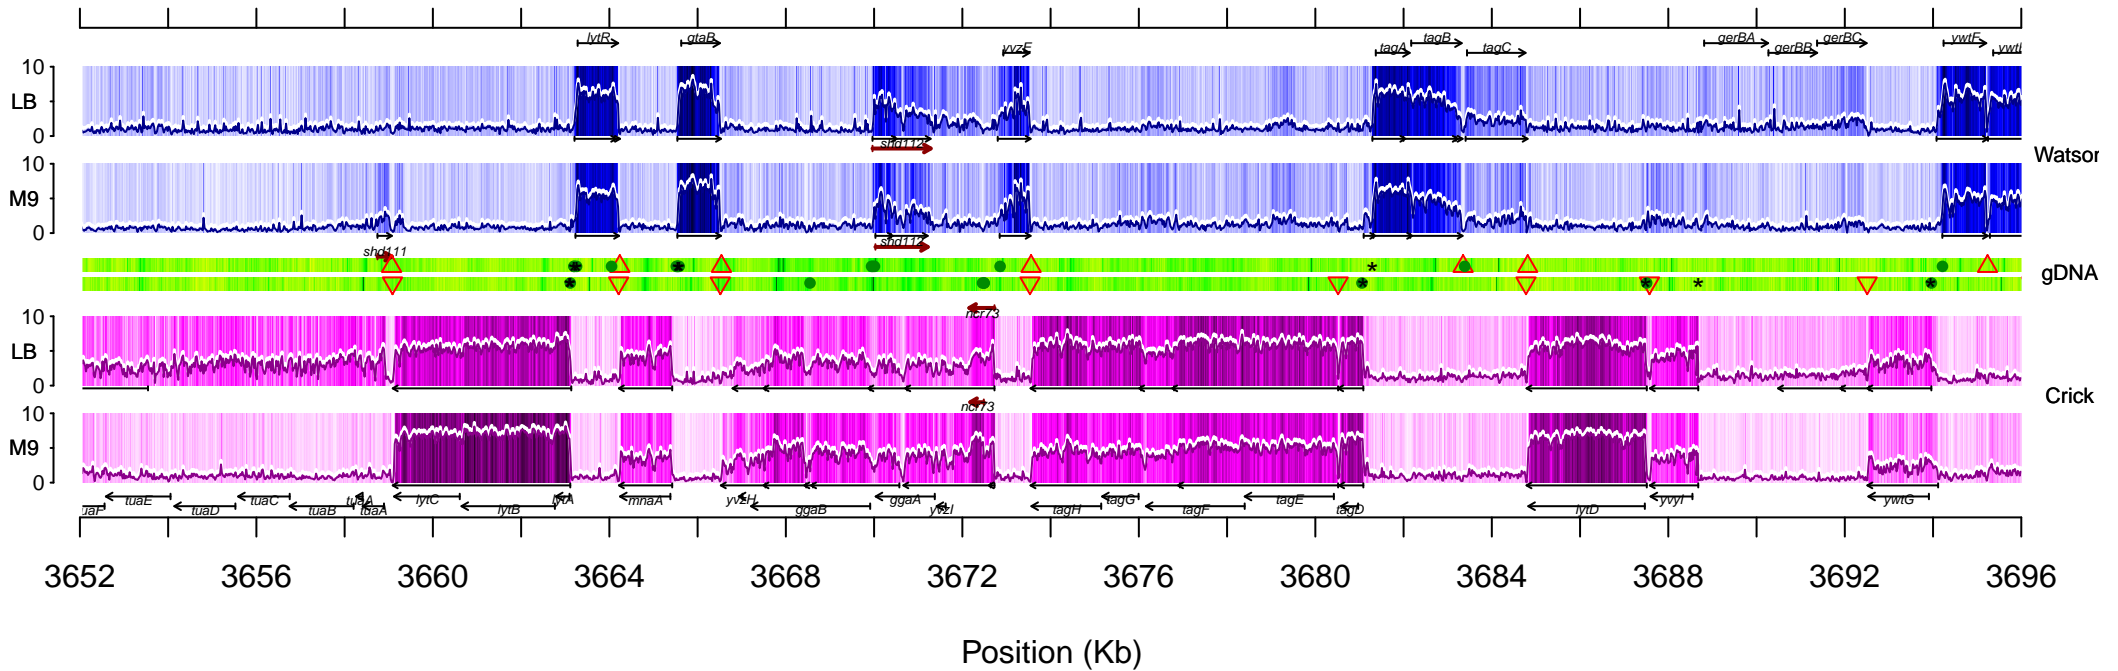



### 3784 – 3828 Kb

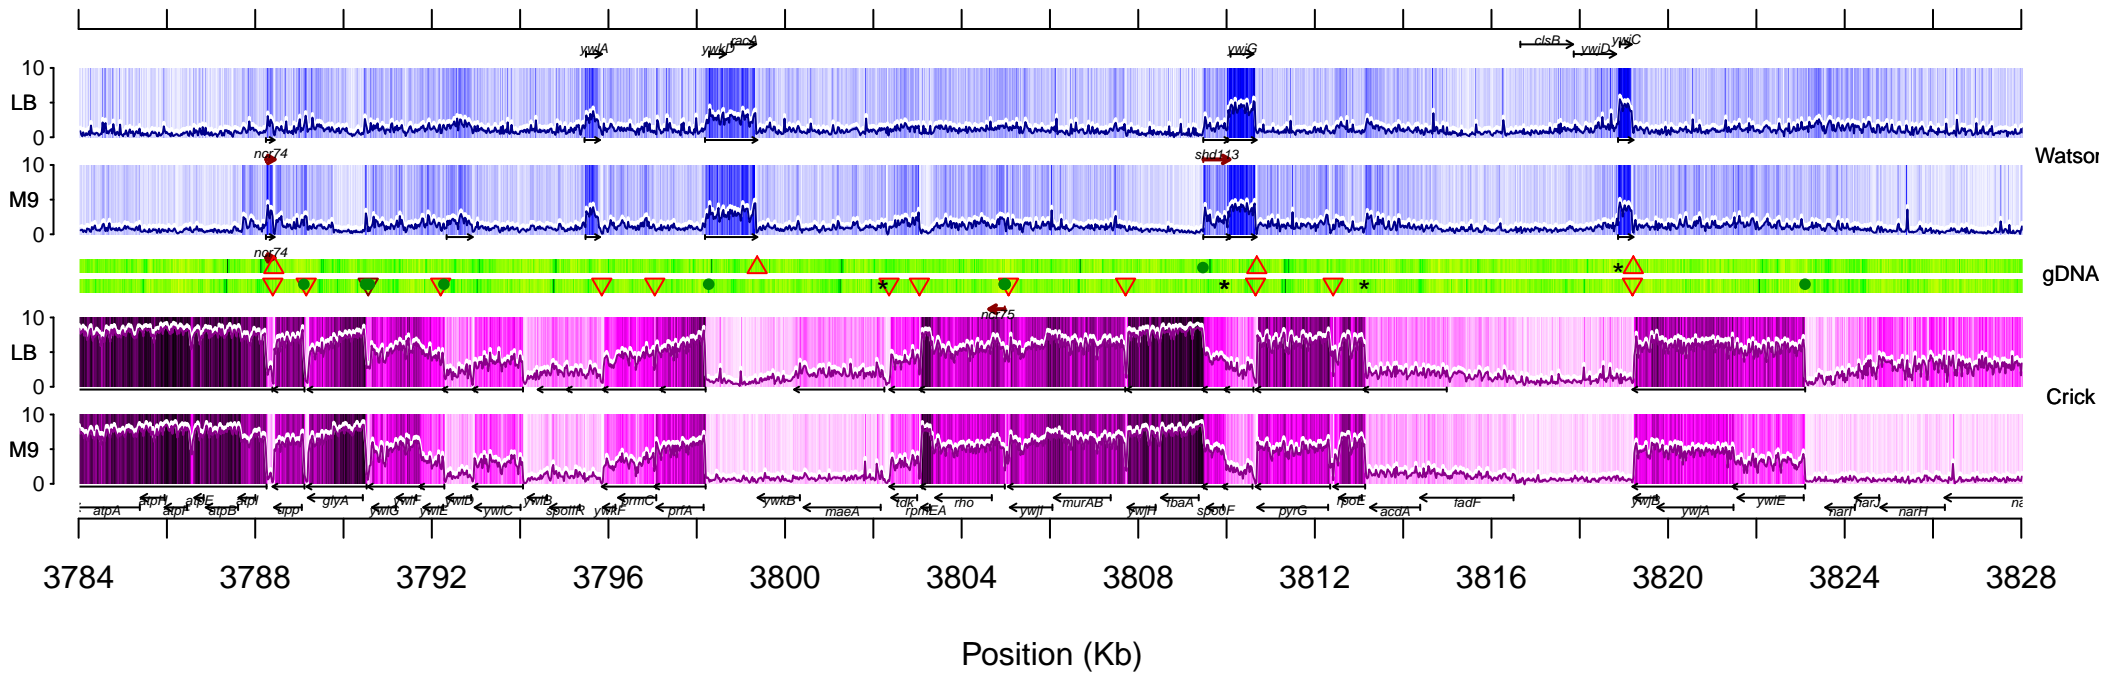

### 3828 – 3871 Kb

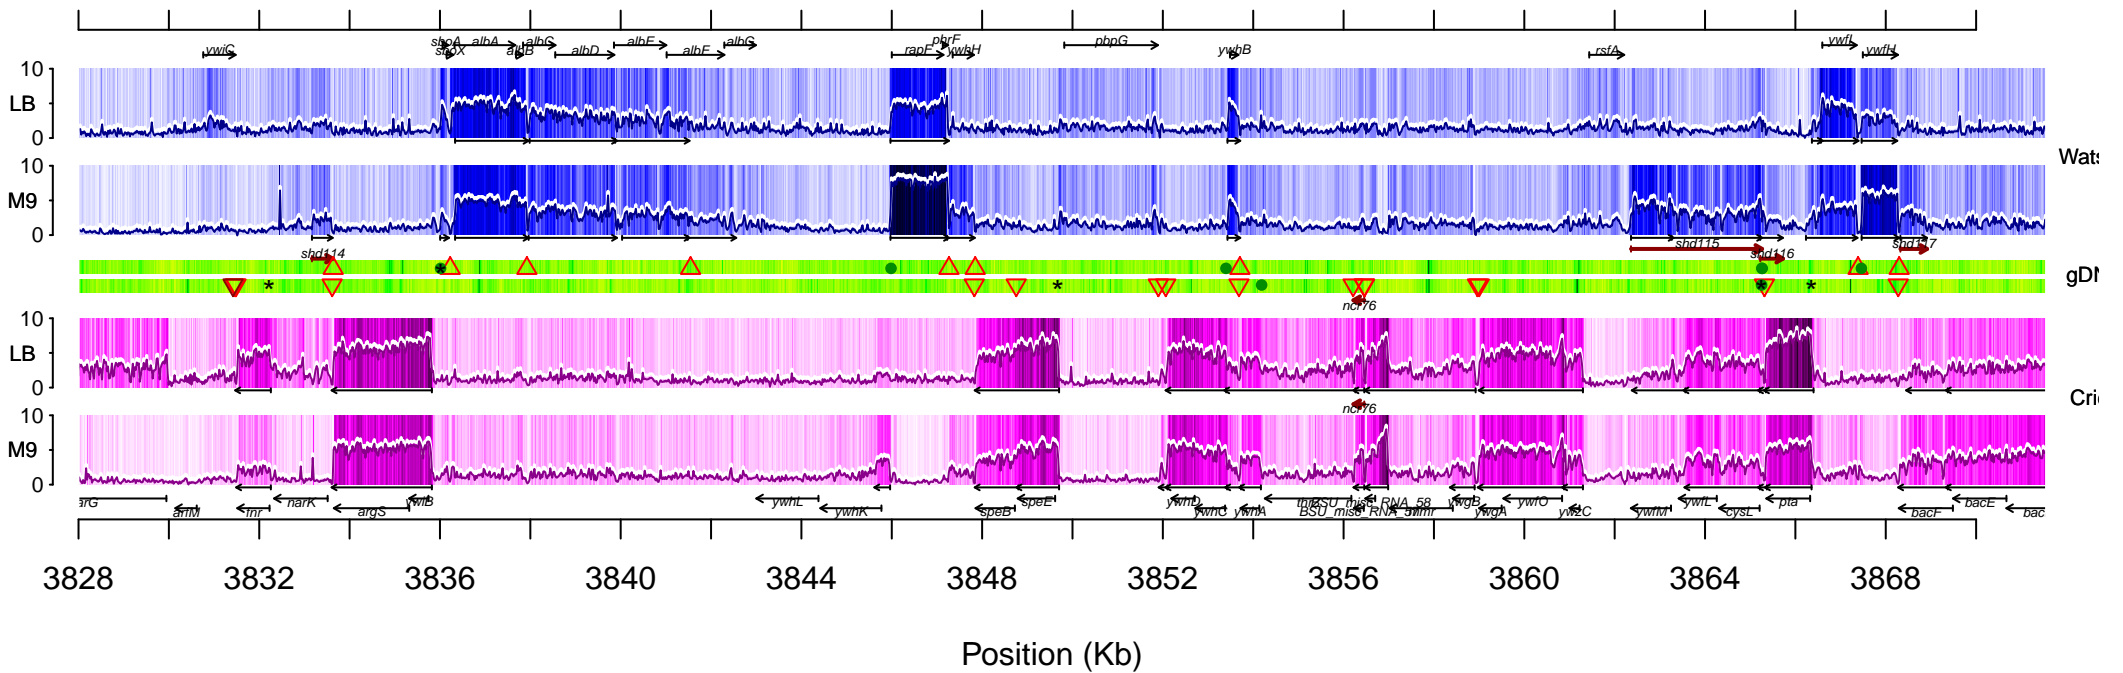

### 3872 – 3916 Kb

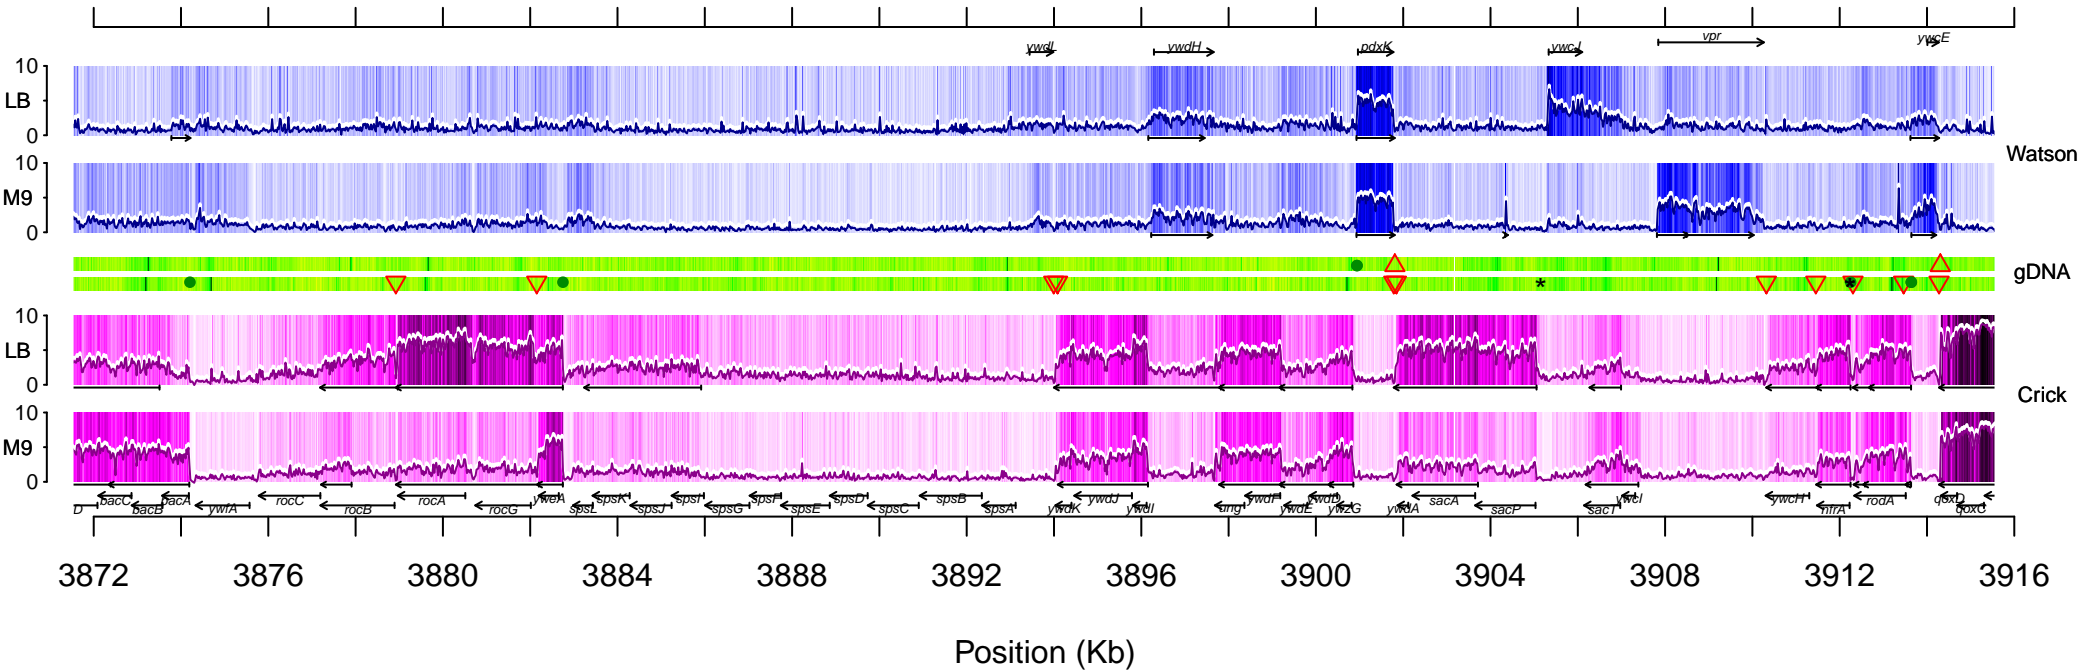

### 3916 – 3960 Kb

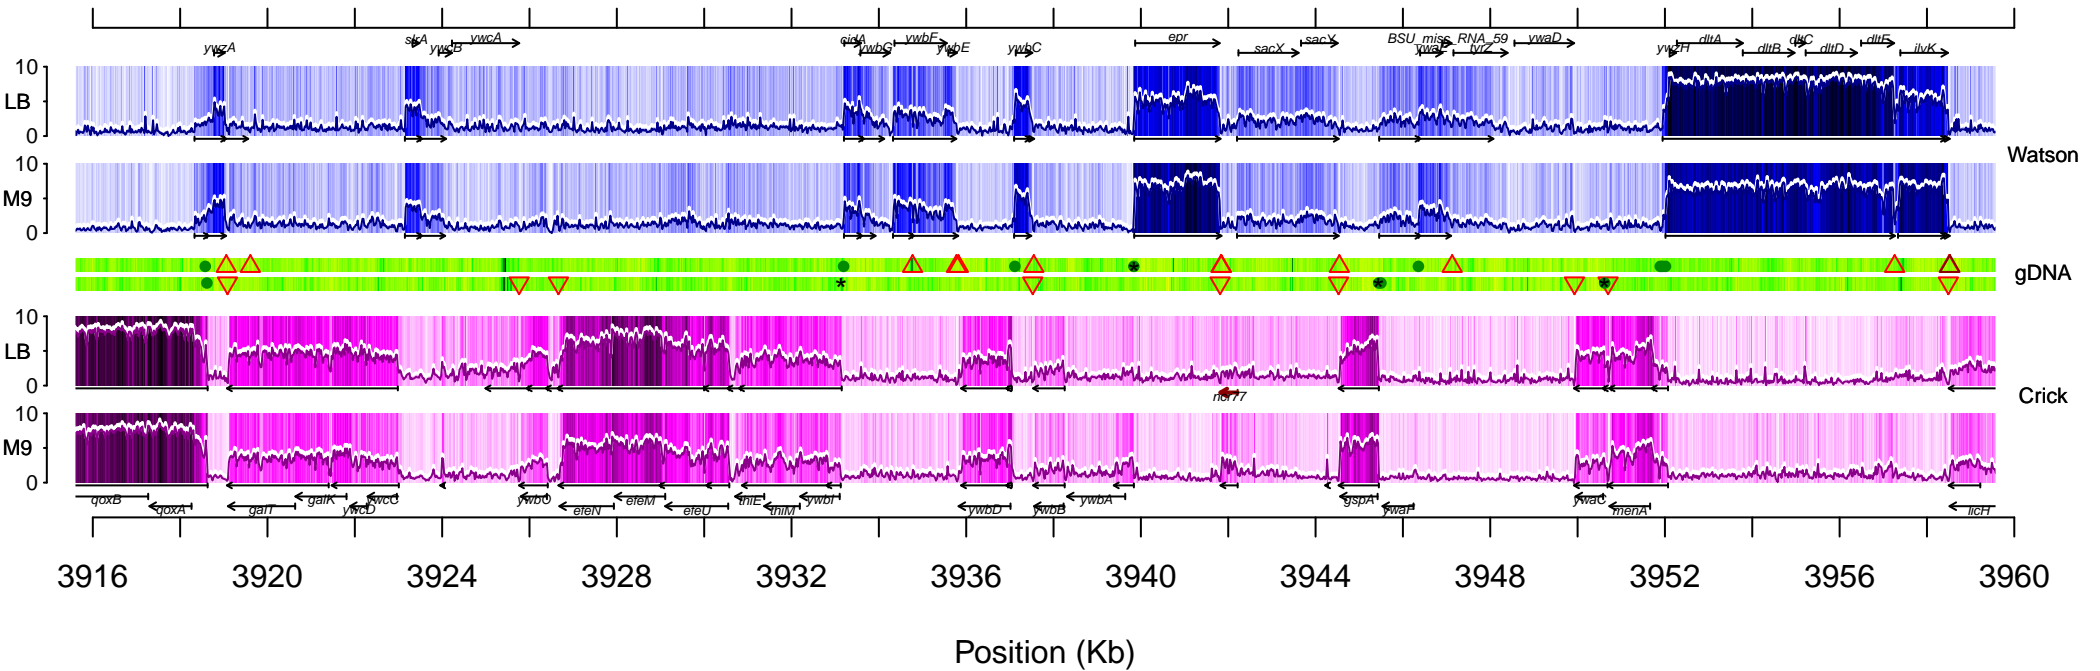



### 4048 – 4092 Kb

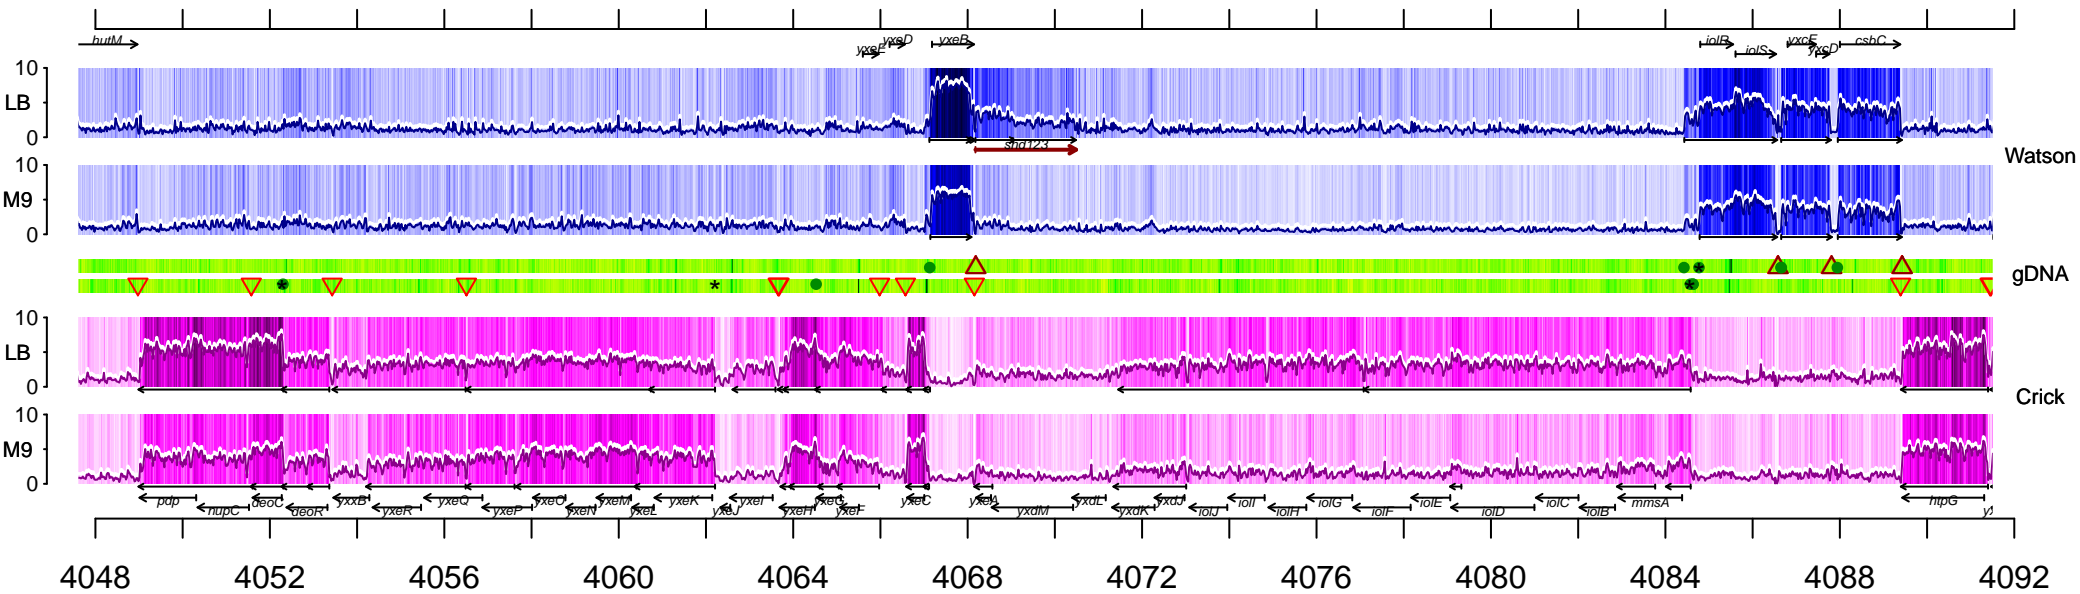

Position (Kb)

### 4092 – 4136 Kb

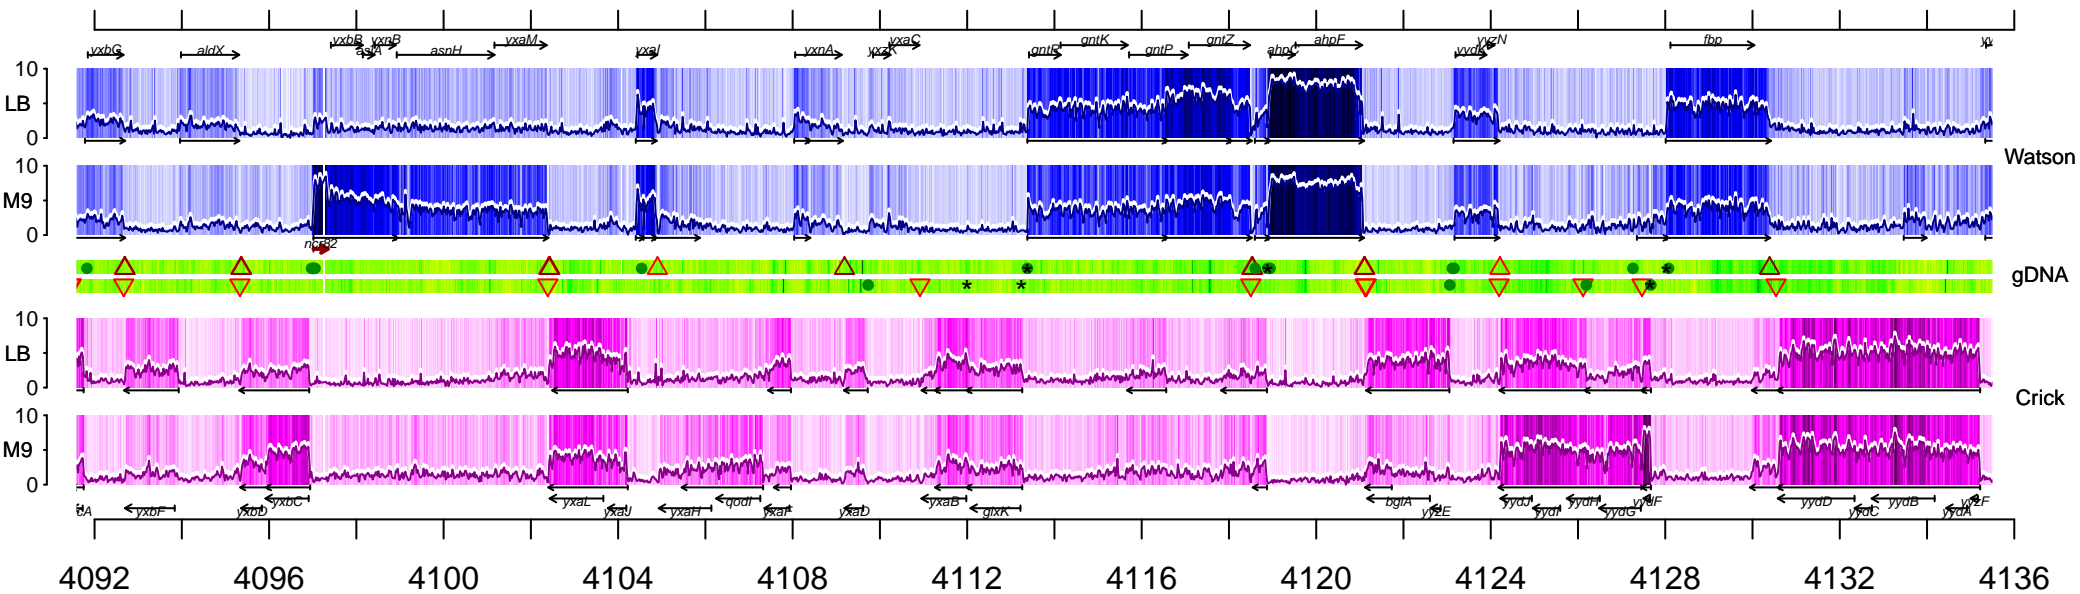

Position (Kb)



### 4136 – 4179 Kb

log<sub>2</sub> foldchange

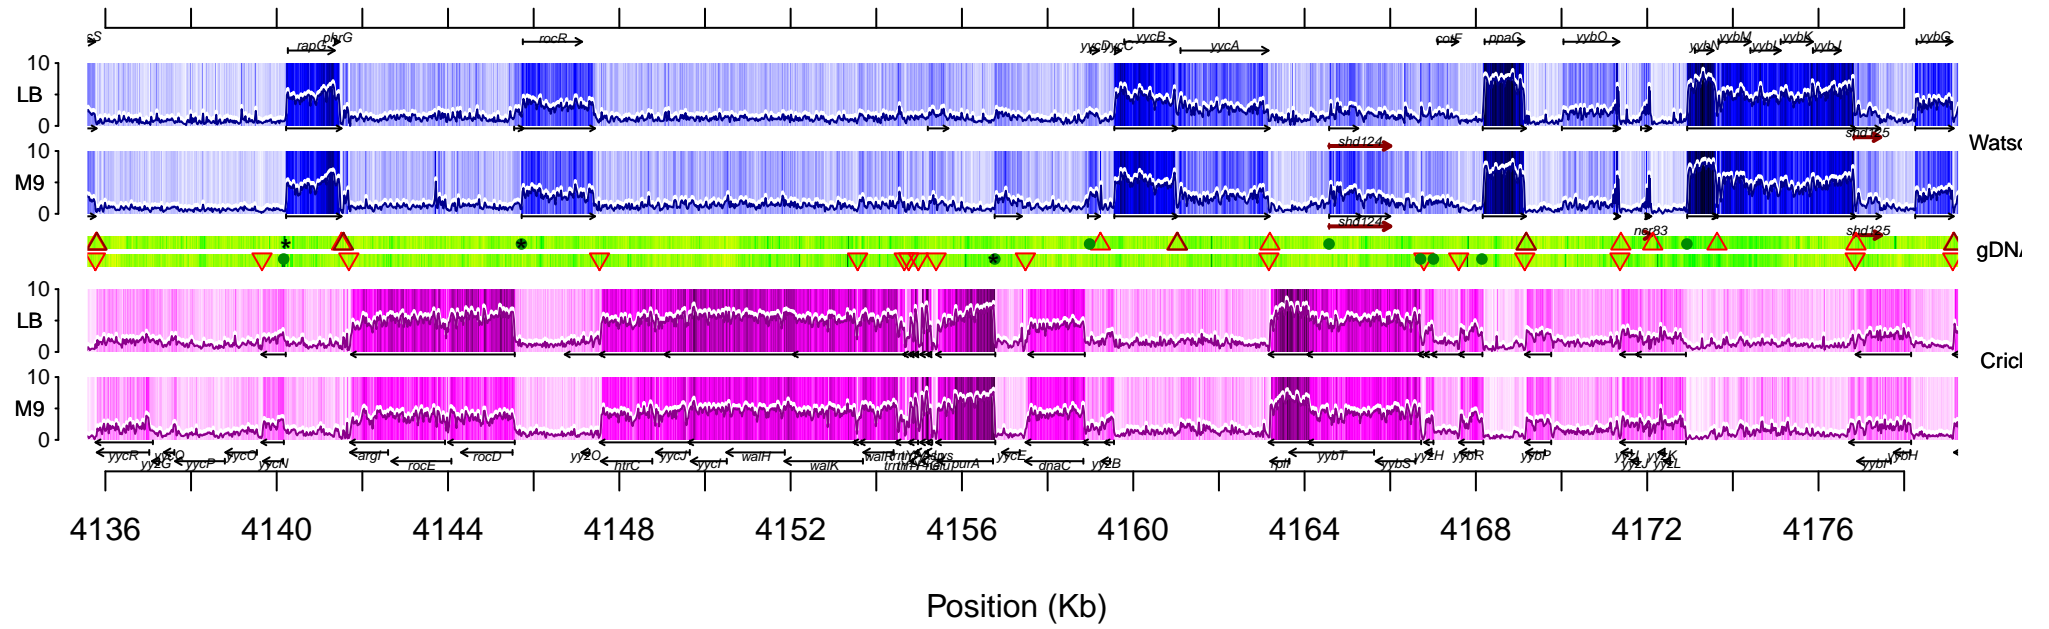

### 4179 – 4216 Kb

log<sub>2</sub> foldchange

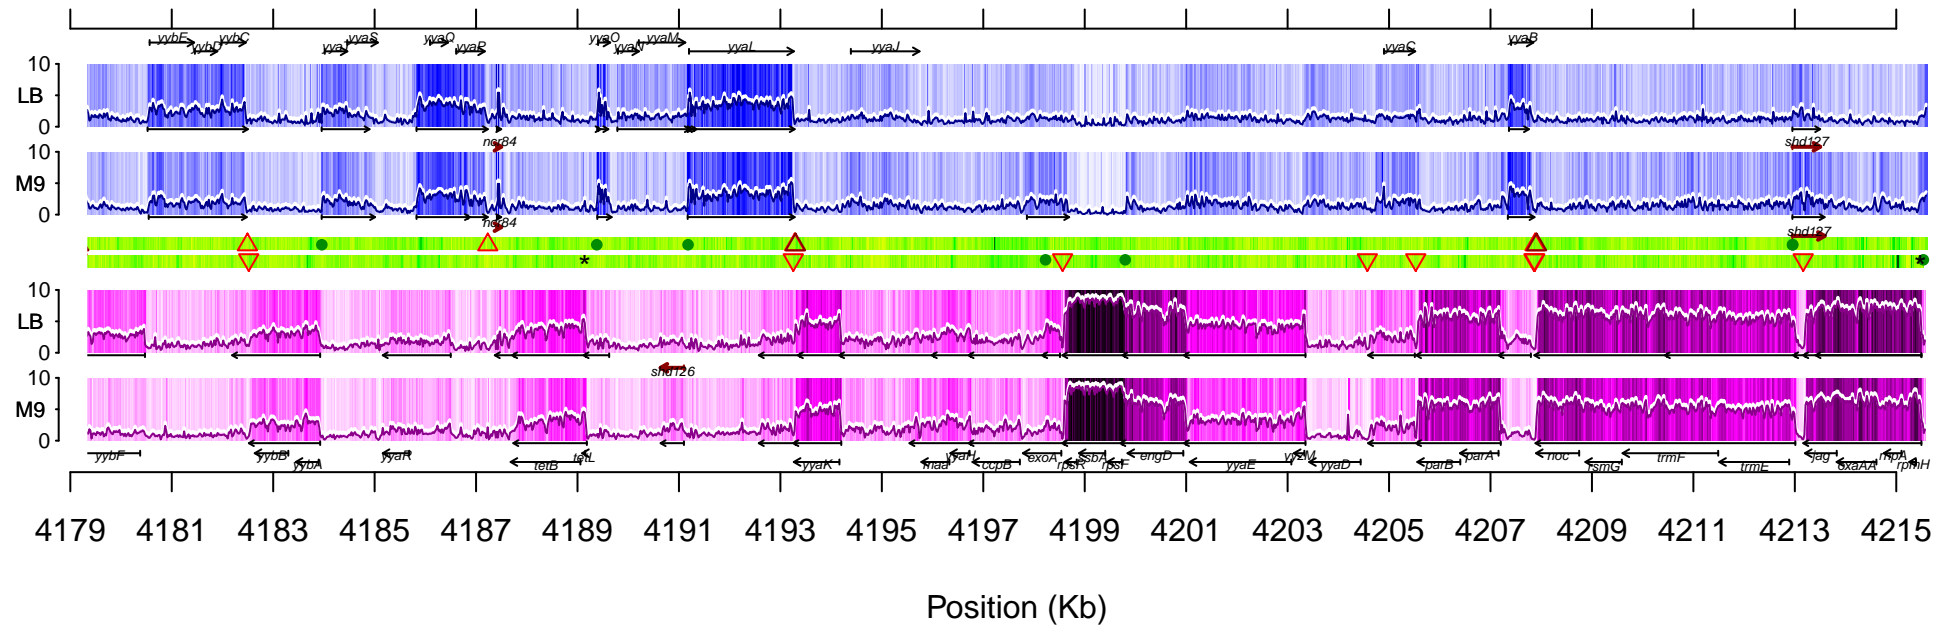

Supplement: mmi0073-1043-SD8.pdf [file mmi0073-1043-SD8.pdf]
